# Supplementary material for: Design and synthesis of ferrocenyl 1,4-dihydropyridines and their evaluation as kinesin-5 inhibitors
Source: Royal Society of Chemistry journal article supplement (doi:10.1039/d4dt01853b), 2024-01-01
Supplement: d4dt01853b1.pdf [file d4dt01853b1.pdf]

## Supporting Information

### Design and Synthesis of Ferrocenyl 1,4-Dihydropyridines and Their Evaluation as Kinesin-5 Inhibitors

Karolina Kowalczyk<sup>1</sup>, Andrzej Błaż<sup>2</sup>, Krzysztof Krawczyk<sup>2</sup>, Błażej Rychlik<sup>2</sup>, Damian Plażuk<sup>1</sup>

<sup>1</sup> *Laboratory of Molecular Spectroscopy, Department of Organic Chemistry, Faculty of Chemistry, University of Lodz, ul. Tamka 12, 91-403 Łódź, Poland*

<sup>2</sup> *Cytometry Lab, Department of Oncobiology and Epigenetics, Faculty of Biology and Environmental Protection, University of Lodz, ul. Pomorska 141/143, 90-236 Łódź, Poland*

### Table of Contents

Additional figures S1 and S2

<sup>1</sup>H and <sup>13</sup>C{<sup>1</sup>H} NMR spectra for compounds **5**, **9a**, **10a-c**, **13e**, **14b-j**, **15a-j**, **16a-c**

HPLC-MS analysis for compounds **5**, **13e**, **14b-j**, **15a-j**, **16a-c**

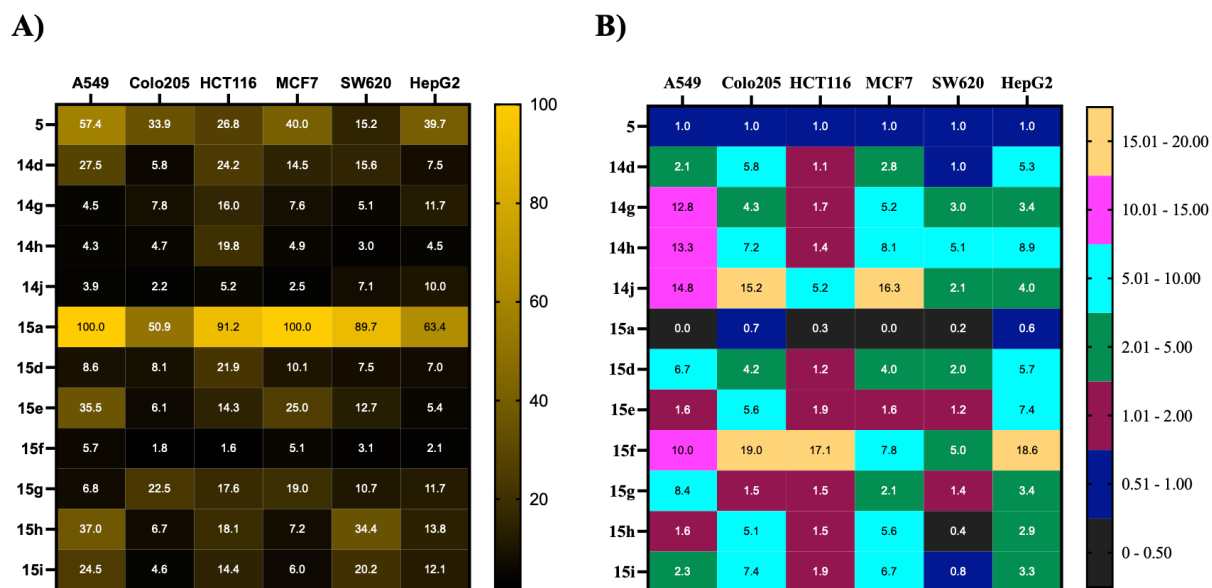

**Figure S1.** Antiproliferative activity **A)** Cytotoxic activity ( $IC_{50}$  values), **B)** The Activity Quotients (AQ) of studied compounds in comparison to cytotoxic activity of **5** were calculated as  $AQ = IC_{50}(5)/IC_{50}(\text{compound})$

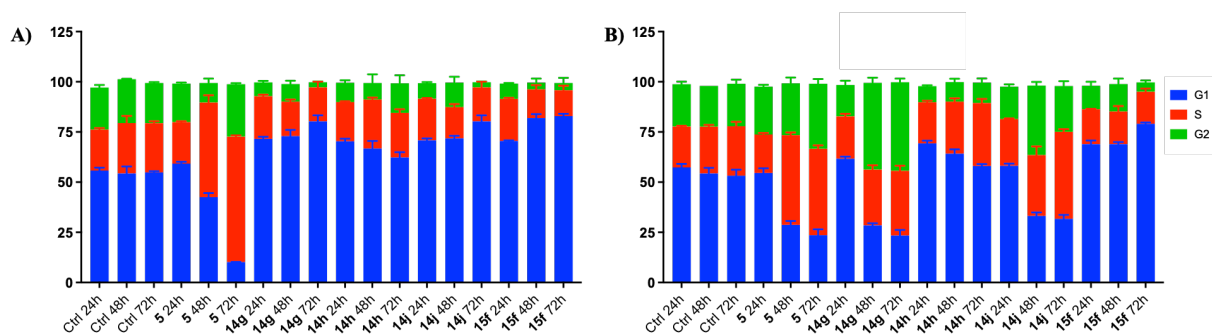

**Figure S2.** Cell cycle phase distribution for A549 (**A**) and SW620 (**B**) cells exposed for 24, 48 and 72h to **5** and its ferrocenyl analogues at concentration equal to the  $IC_{75}$  values for **5**. Data are presented as mean  $\pm$  SD,  $n = 3$

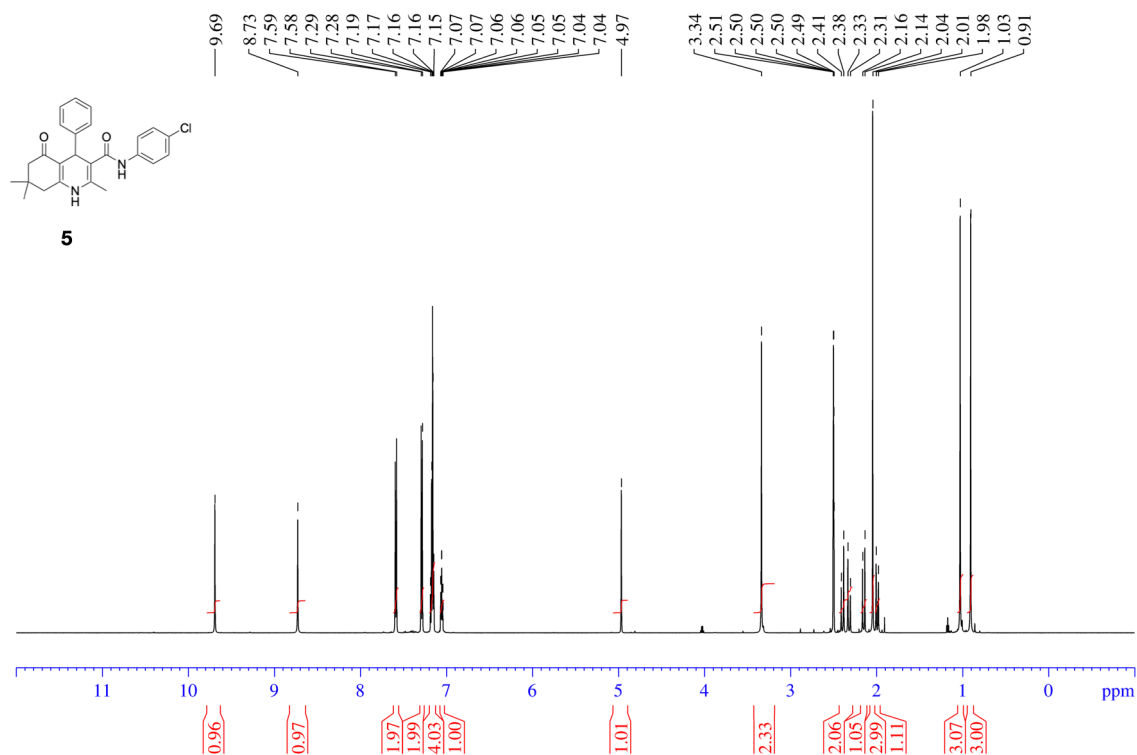

**Figure S3.** <sup>1</sup>H NMR spectrum of **5** in DMSO-d<sub>6</sub>

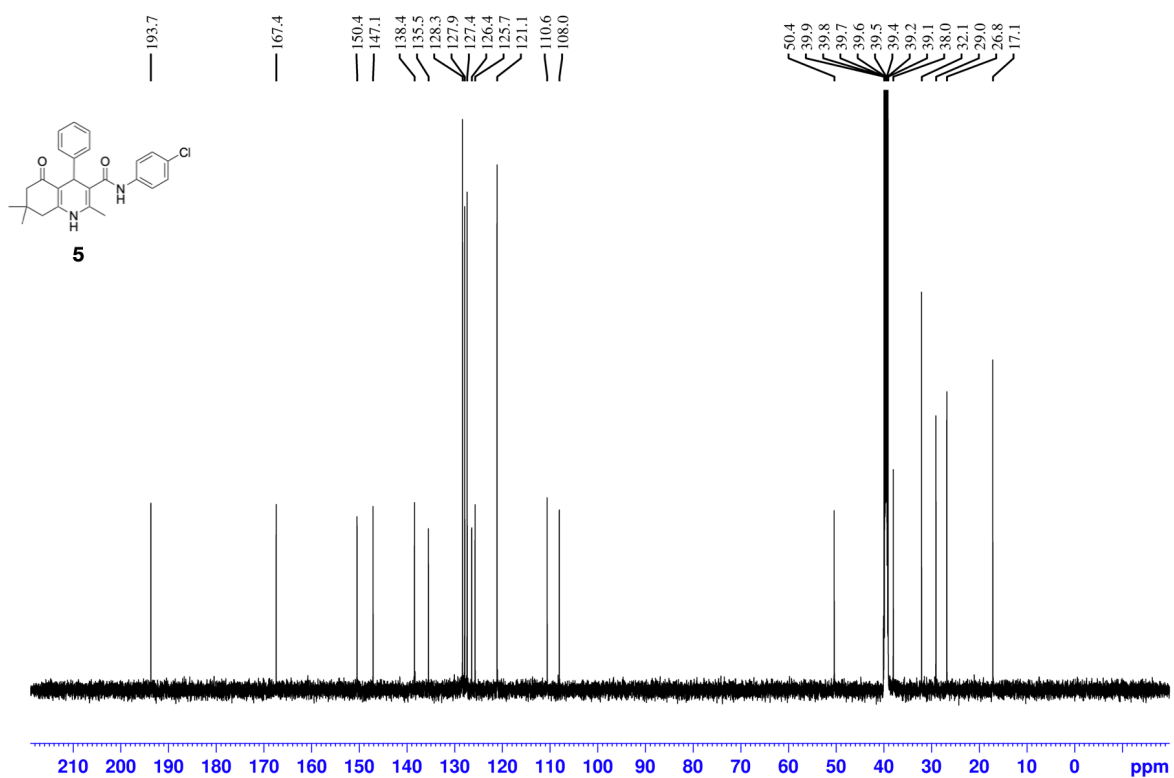

**Figure S4.** <sup>13</sup>C{<sup>1</sup>H} NMR spectrum of **5** in DMSO-d<sub>6</sub>

Sample Type : Unknown  
 Sample Name : KKG-90012  
 Sample ID : KKG-90012  
 Vial# : 84  
 Injection Volume : 1

Method

<<LC Time Program>>

| Time  | Module     | Command | Valu |
|-------|------------|---------|------|
| 4.00  | Pumps      | B.Conc  | 90   |
| 7.00  | Pumps      | B.Conc  | 90   |
| 7.00  | Pumps      | B.Conc  | 90   |
| 13.00 | Controller | Stop    | 50   |

<<Mobile Phase Name>>

Mobile Phase A : water+0.01%HCOOH  
 Mobile Phase B : Methanol+0.01%HCOOH

<<Data Acquisition>>

LC Stop Time : 13.00 min

<<Pump>>

Total Flow : 0.3000 mL/min

Peak Table

| Peak# | Ret. Time | Area%   |
|-------|-----------|---------|
| 1     | 7.208     | 0.925   |
| 2     | 7.513     | 98.160  |
| 3     | 8.138     | 0.915   |
| Total |           | 100.000 |

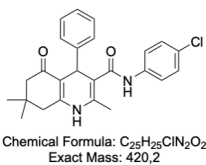

5

Figure S5. HPLC-MS analysis of 5

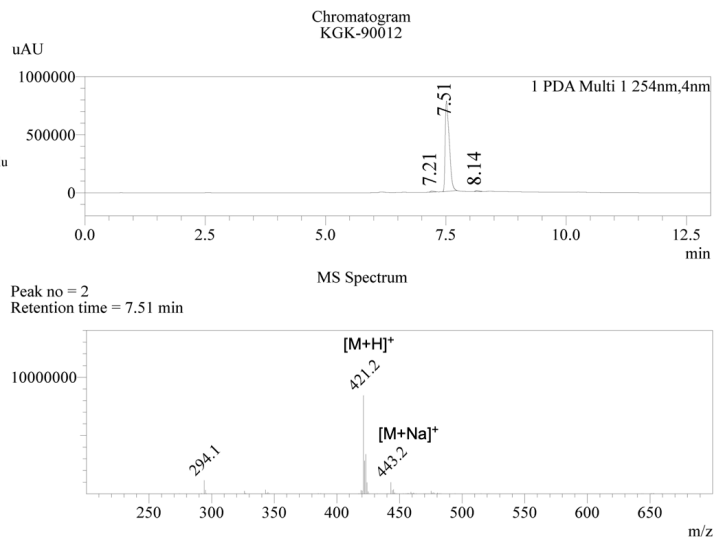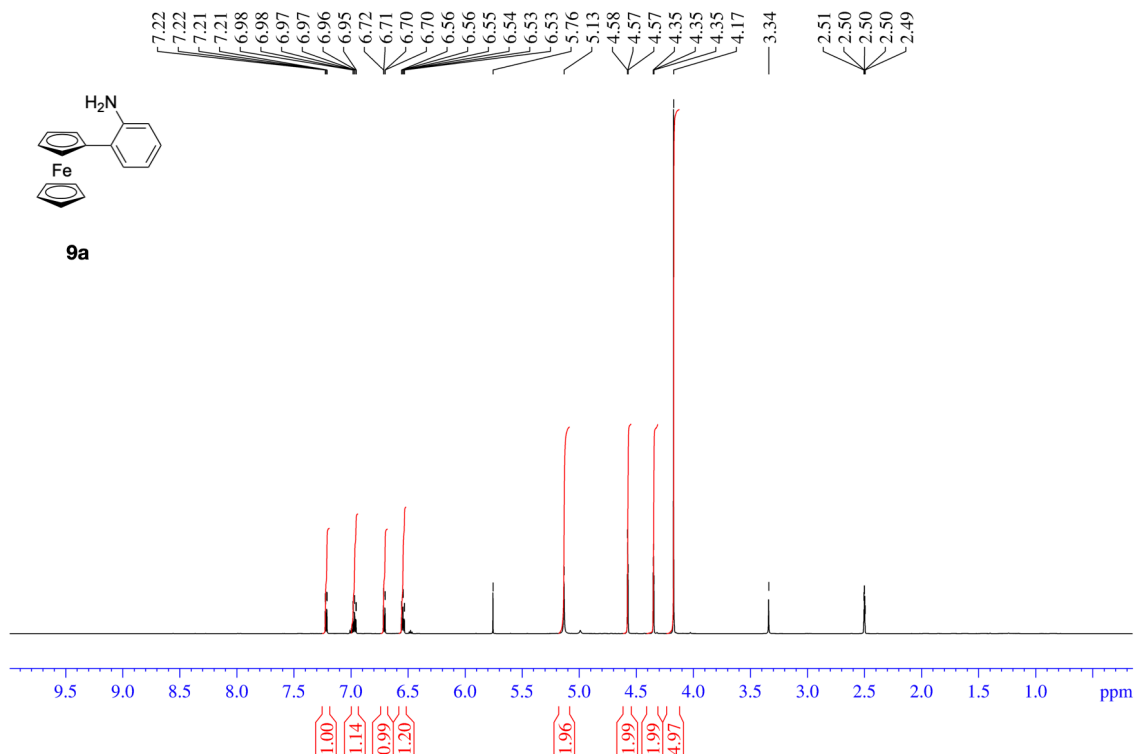

Figure S6. <sup>1</sup>H NMR spectrum of 9a in DMSO-d<sub>6</sub>

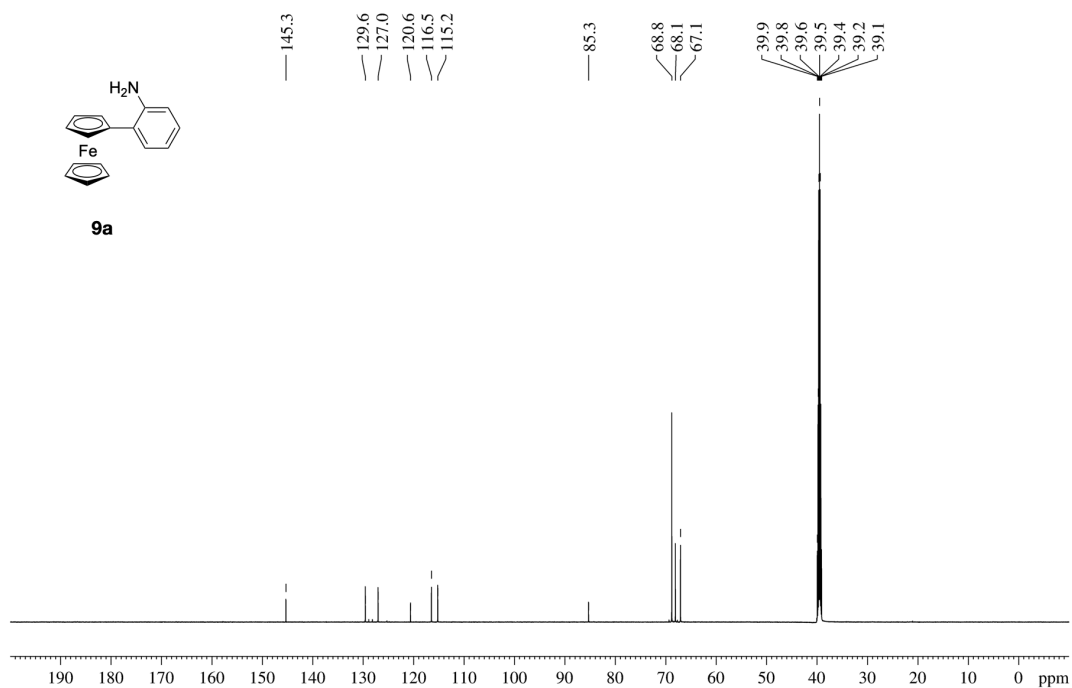

**Figure S7.**  $^{13}\text{C}\{^1\text{H}\}$  NMR spectrum of **9a** in  $\text{DMSO-d}_6$

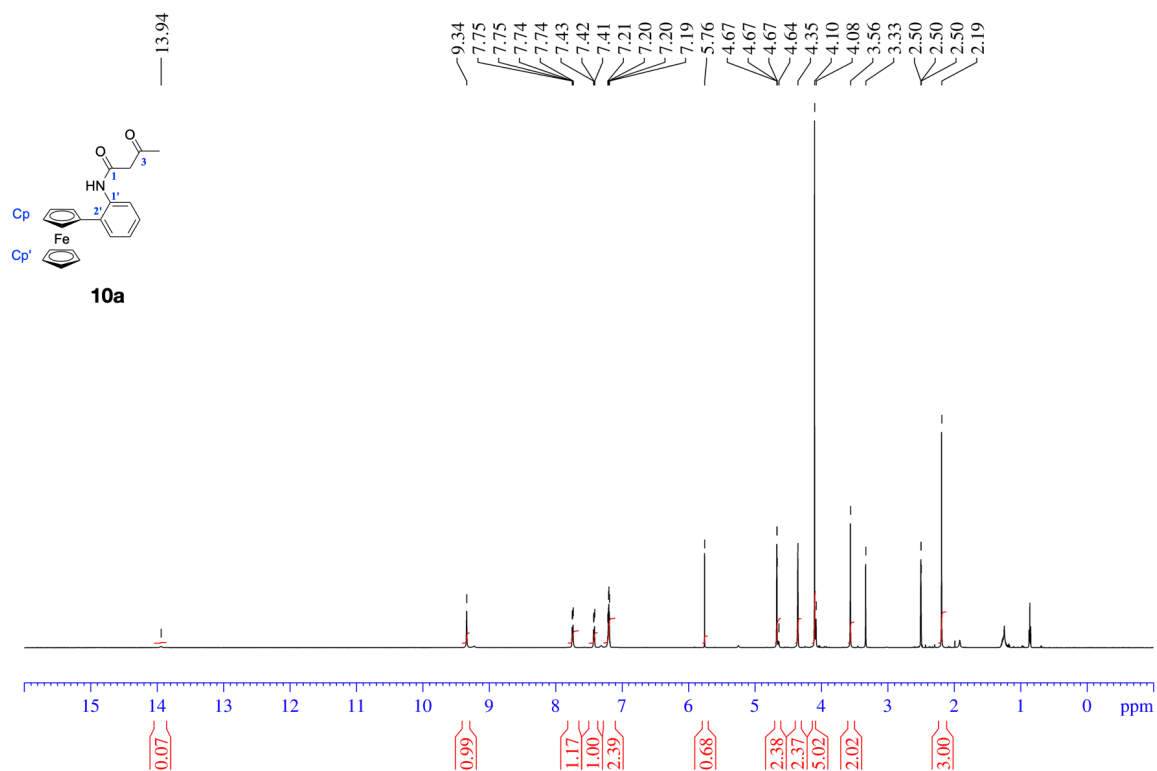

**Figure S8.**  $^1\text{H}$  NMR spectrum of **10a** in  $\text{DMSO-d}_6$

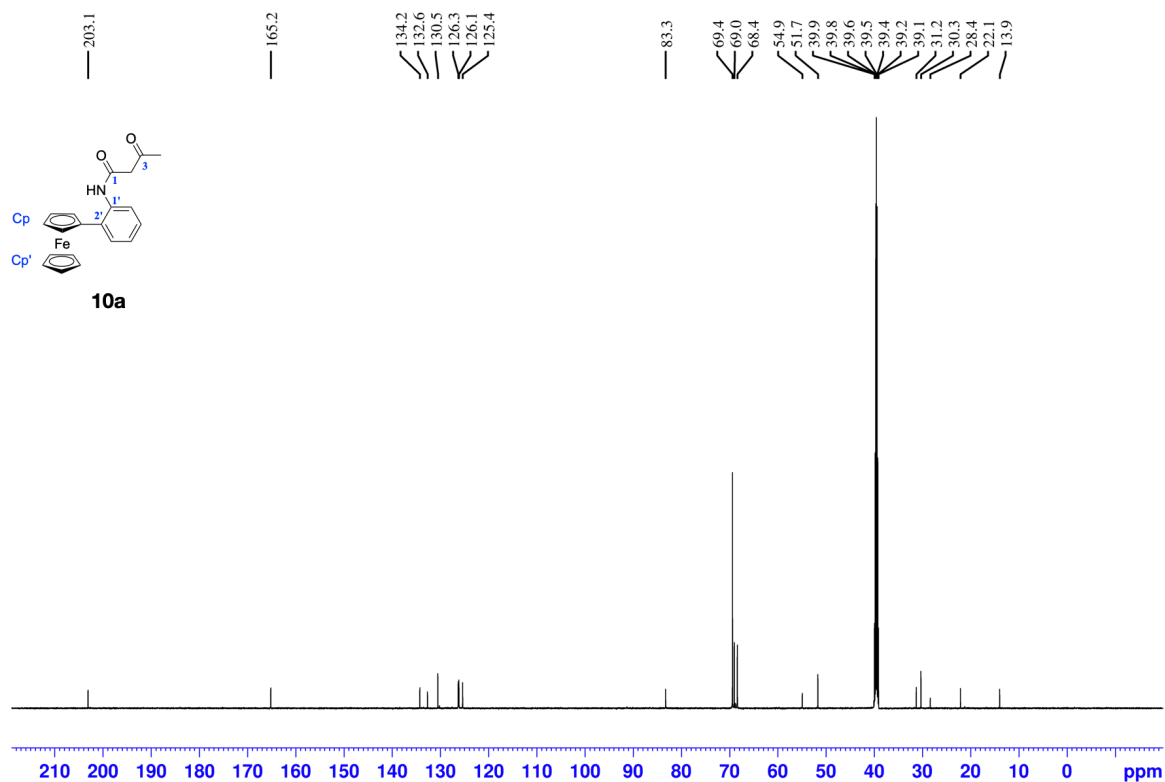

**Figure S9.**  $^{13}\text{C}\{^1\text{H}\}$  NMR spectrum of **10a** in  $\text{DMSO-d}_6$

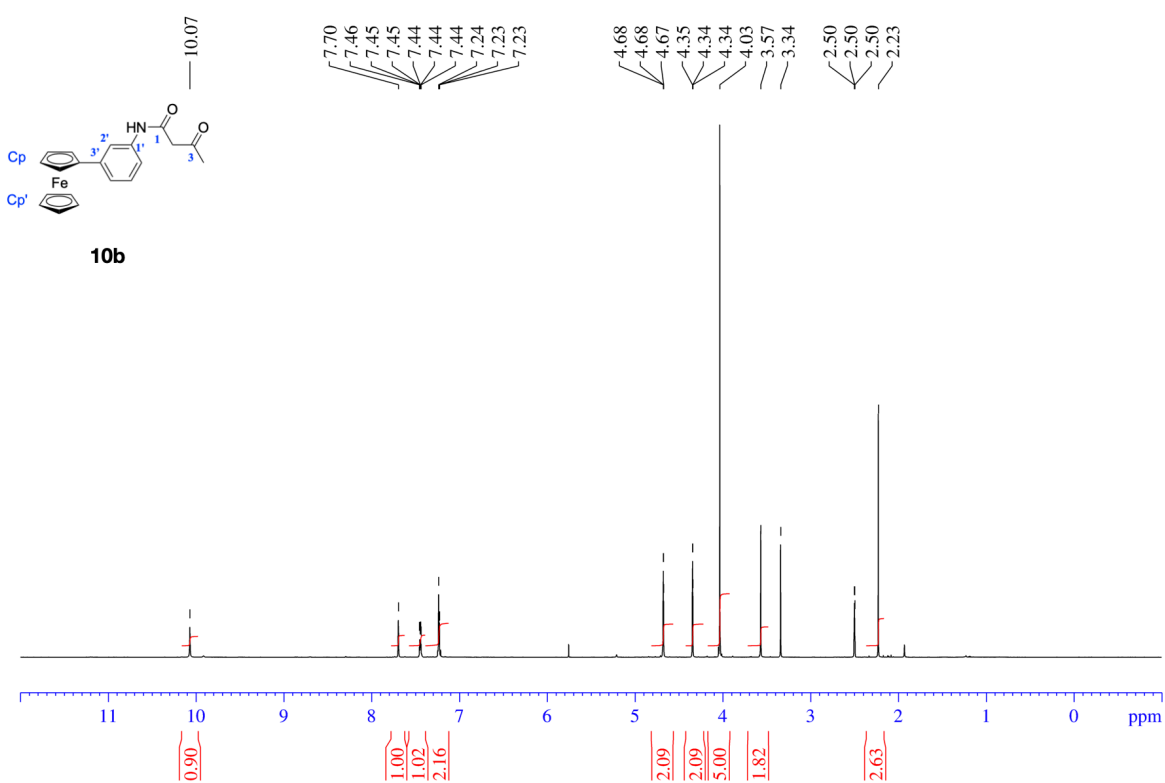

**Figure S10.**  $^1\text{H}$  NMR spectrum of **10b** in  $\text{DMSO-d}_6$

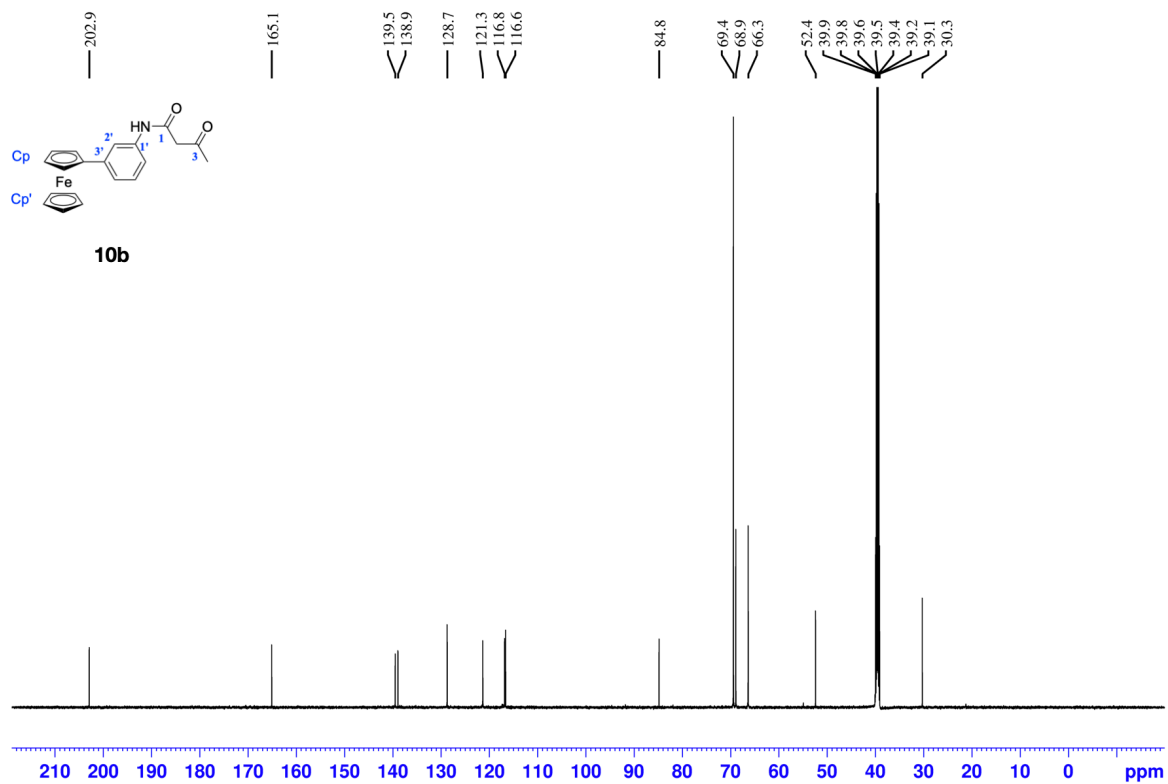

**Figure S11.**  $^{13}\text{C}\{^1\text{H}\}$  NMR spectrum of **10b** in  $\text{DMSO-d}_6$

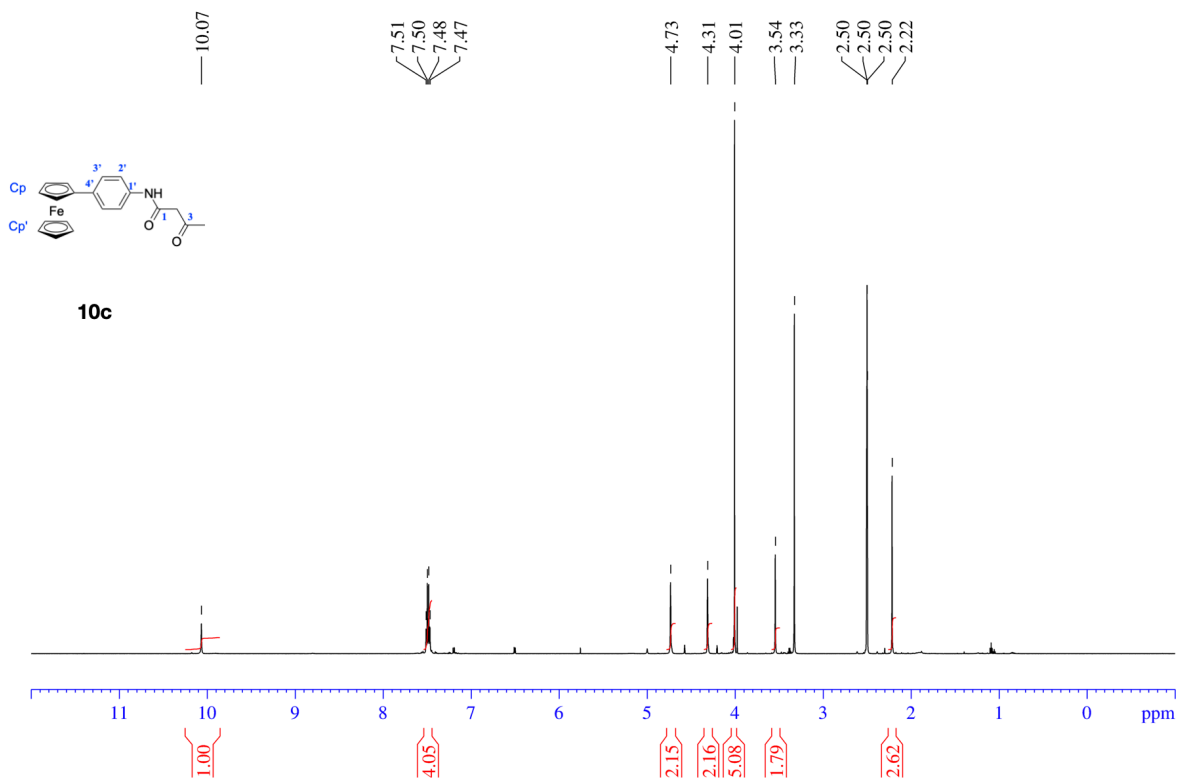

**Figure S12.**  $^1\text{H}$  NMR spectrum of **10c** in  $\text{DMSO-d}_6$

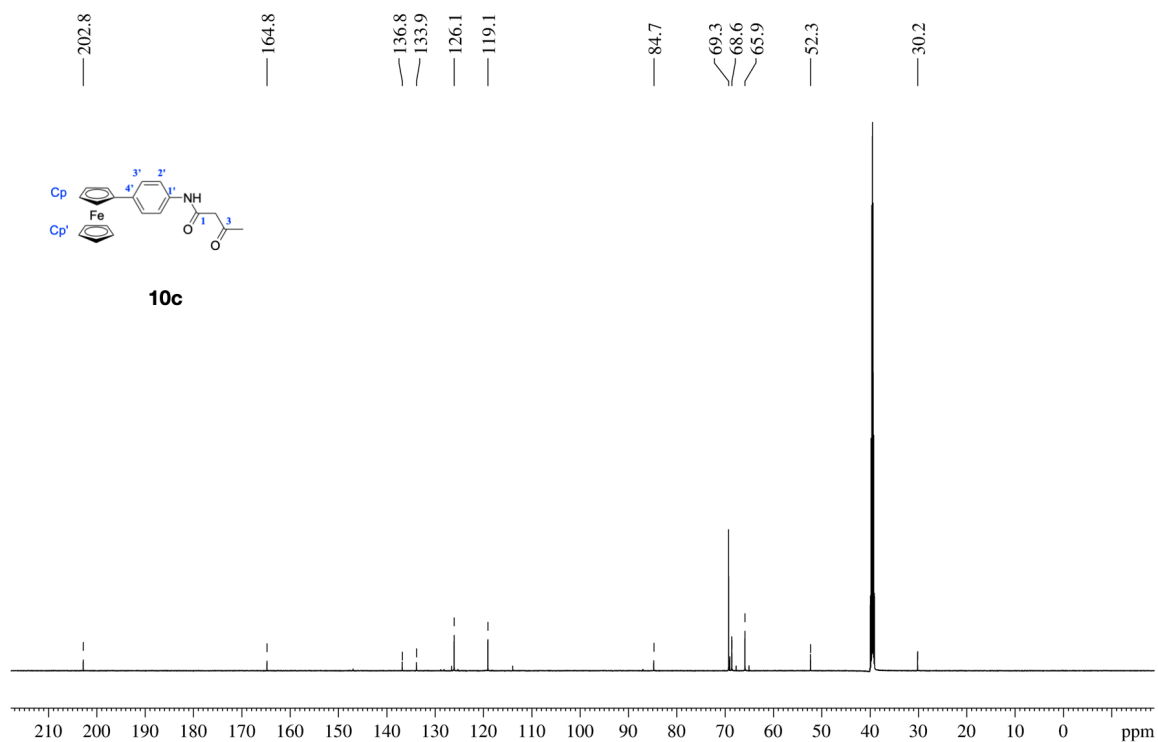

**Figure S13.**  $^{13}\text{C}\{^1\text{H}\}$  NMR spectrum of **10c** in  $\text{DMSO-d}_6$

DMSO - 300K

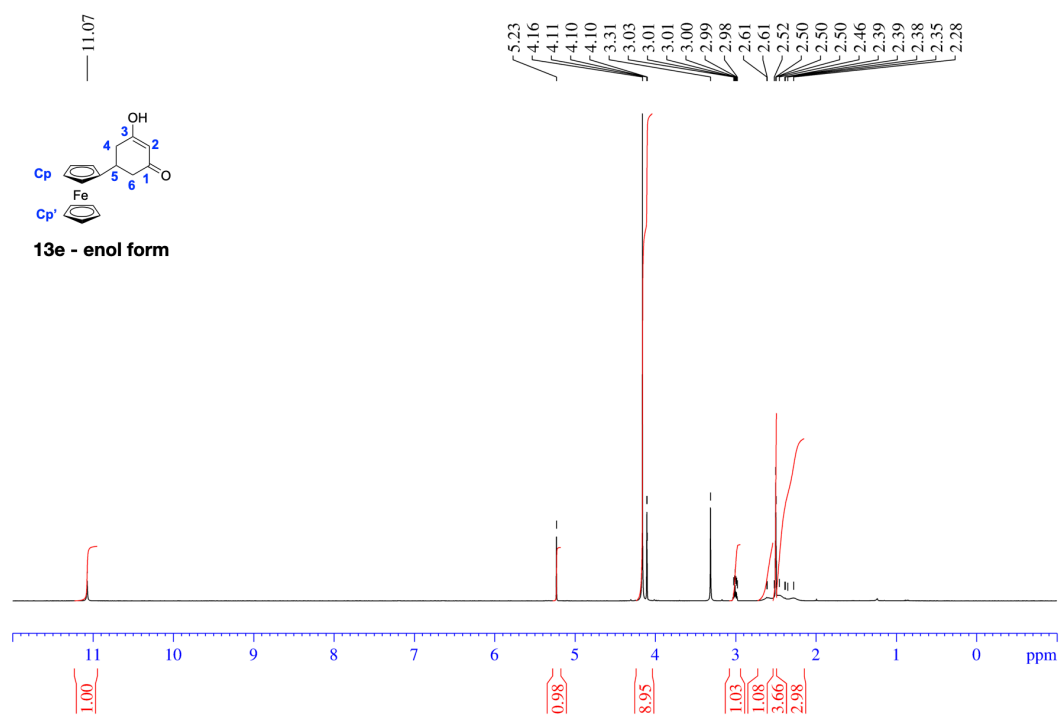

**Figure S14.**  $^1\text{H}$  NMR spectrum of **13e** in  $\text{DMSO-d}_6$



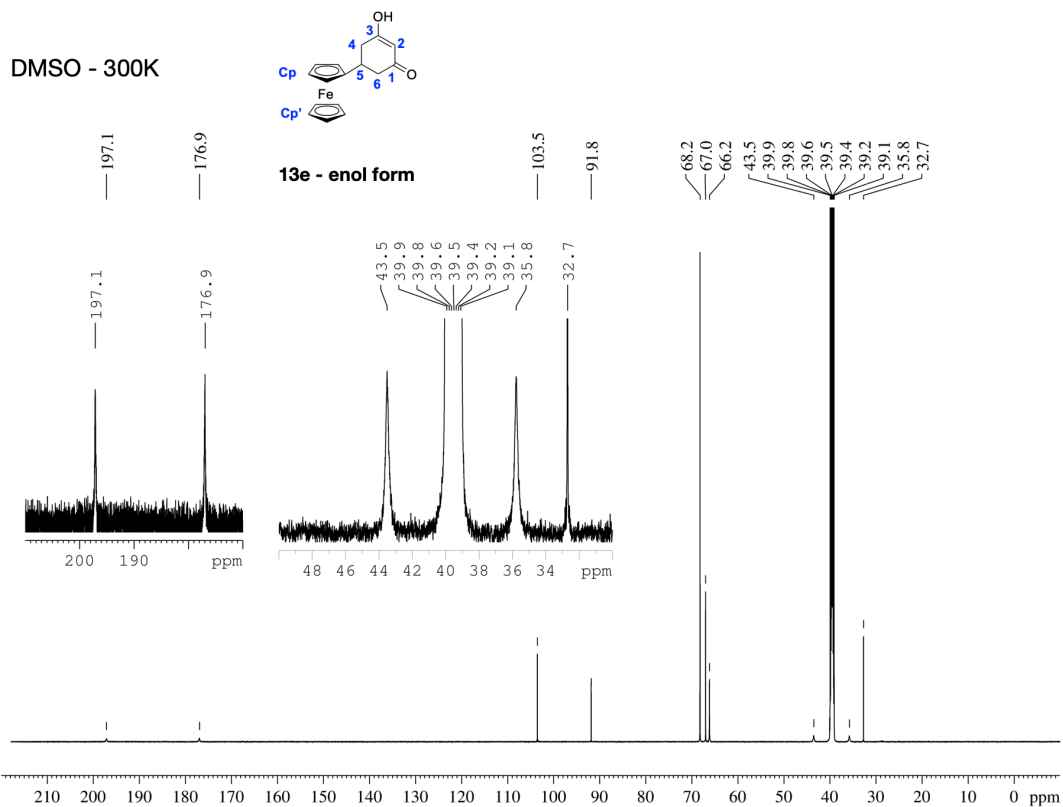

**Figure S15.**  $^{13}\text{C}\{^1\text{H}\}$  NMR spectrum of **13e** in  $\text{DMSO-d}_6$

$\text{CD}_2\text{Cl}_2$  - 300K

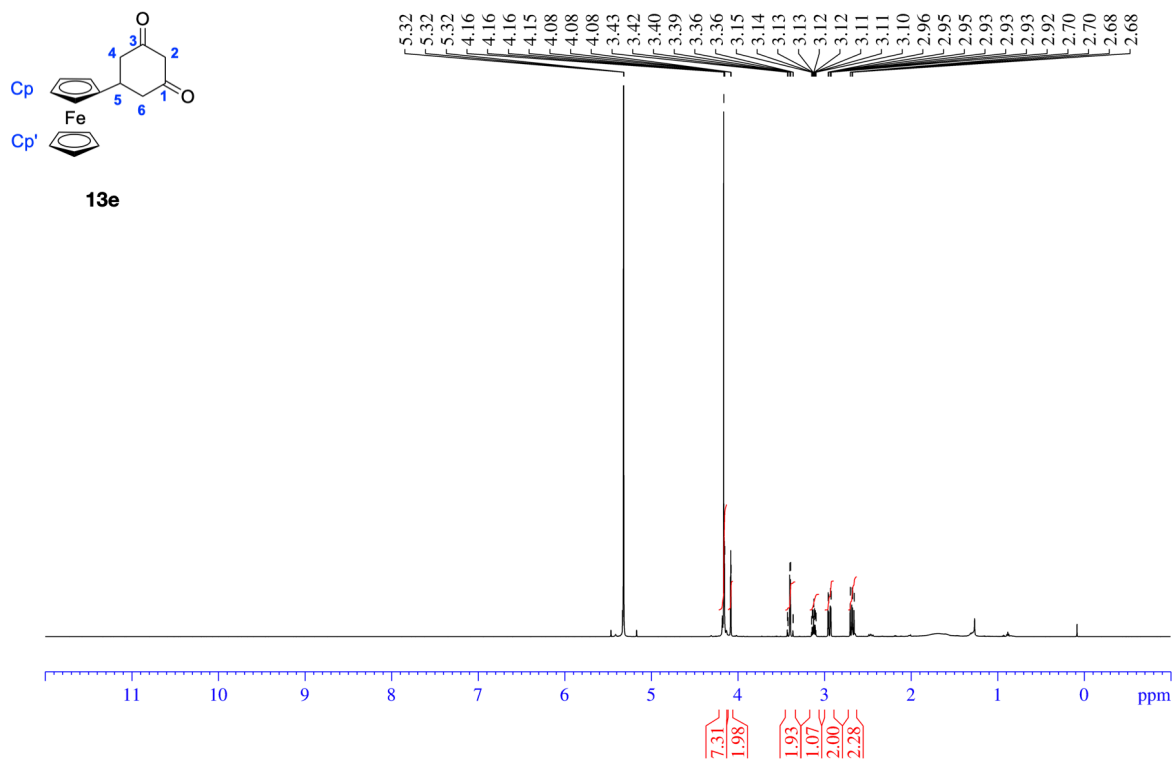

**Figure S16.**  $^1\text{H}$  NMR spectrum of **13e** in  $\text{DMSO-d}_6$

CD<sub>2</sub>Cl<sub>2</sub> - 300K

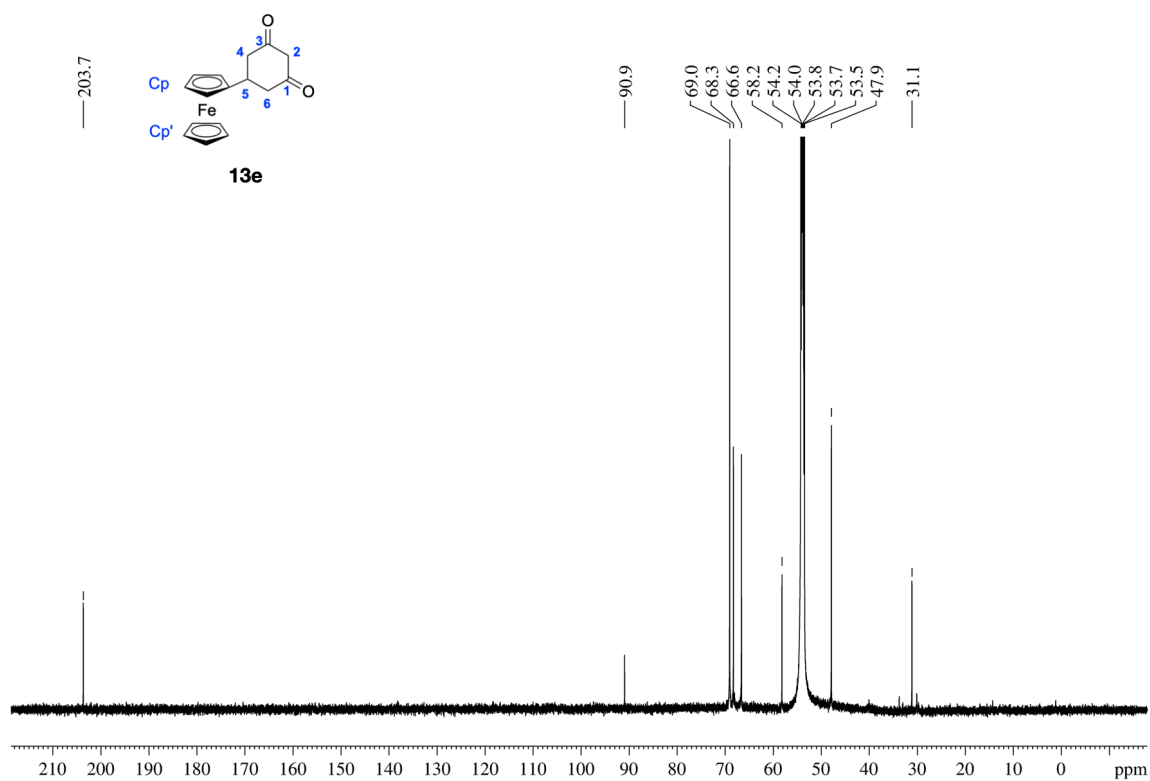

**Figure S17.** <sup>13</sup>C{<sup>1</sup>H} NMR spectrum of **13e** in DMSO-d<sub>6</sub>  
CD<sub>2</sub>Cl<sub>2</sub> - 243K

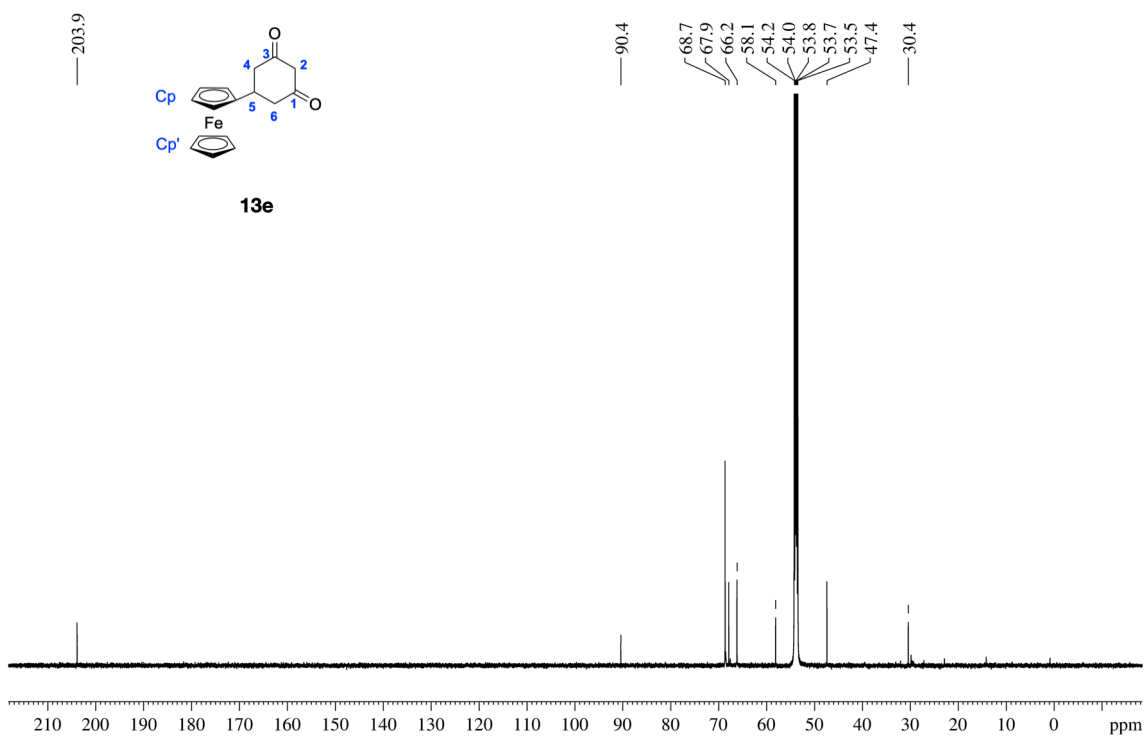

**Figure S18.** <sup>13</sup>C{<sup>1</sup>H} NMR spectrum of **13e** in DMSO-d<sub>6</sub>

Sample Information  
 Sample Type : Unknown  
 Sample Name : DPX-90010  
 Sample ID : DPX-90010  
 Vial# : 1  
 Injection Volume : 0.3

Method  
 Time : 4.00  
 7.00  
 7.05  
 13.00

Module  
 Pumps  
 Pumps  
 Pumps  
 Controller

Command  
 B.Conc  
 B.Conc  
 B.Conc  
 Stop

<<Column Information>>  
 Column Name : XB-C18  
 Column Length : 50 mm  
 Inner Diameter : 2.1 mm

<<Mobile Phase Name>>  
 Mobile Phase A : water+0.01%HCOOH  
 Mobile Phase B : Methanol+0.01%HCOOH

<<Data Acquisition>>  
 LC Stop Time : 13.00 min

<<Pump>>  
 Total Flow : 0.3000 mL/min

Peak Table

| Peak# | Ret. Time | Area%   |
|-------|-----------|---------|
| 1     | 8.774     | 98.505  |
| 2     | 9.294     | 0.903   |
| 3     | 9.716     | 0.592   |
| Total |           | 100.000 |

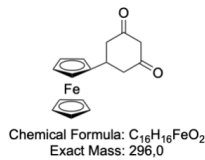

13e

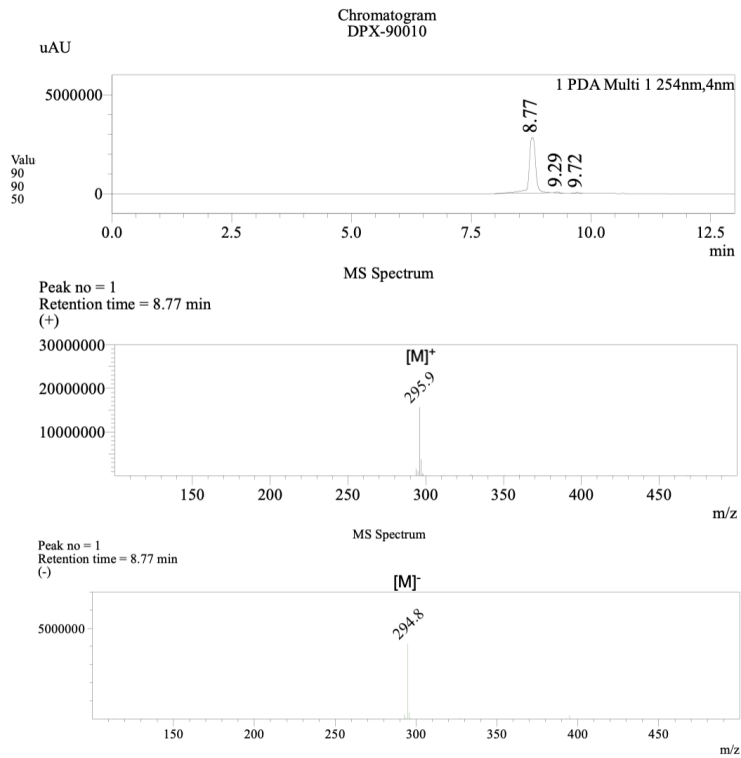

Figure S19. HPLC-MS analysis of 13e

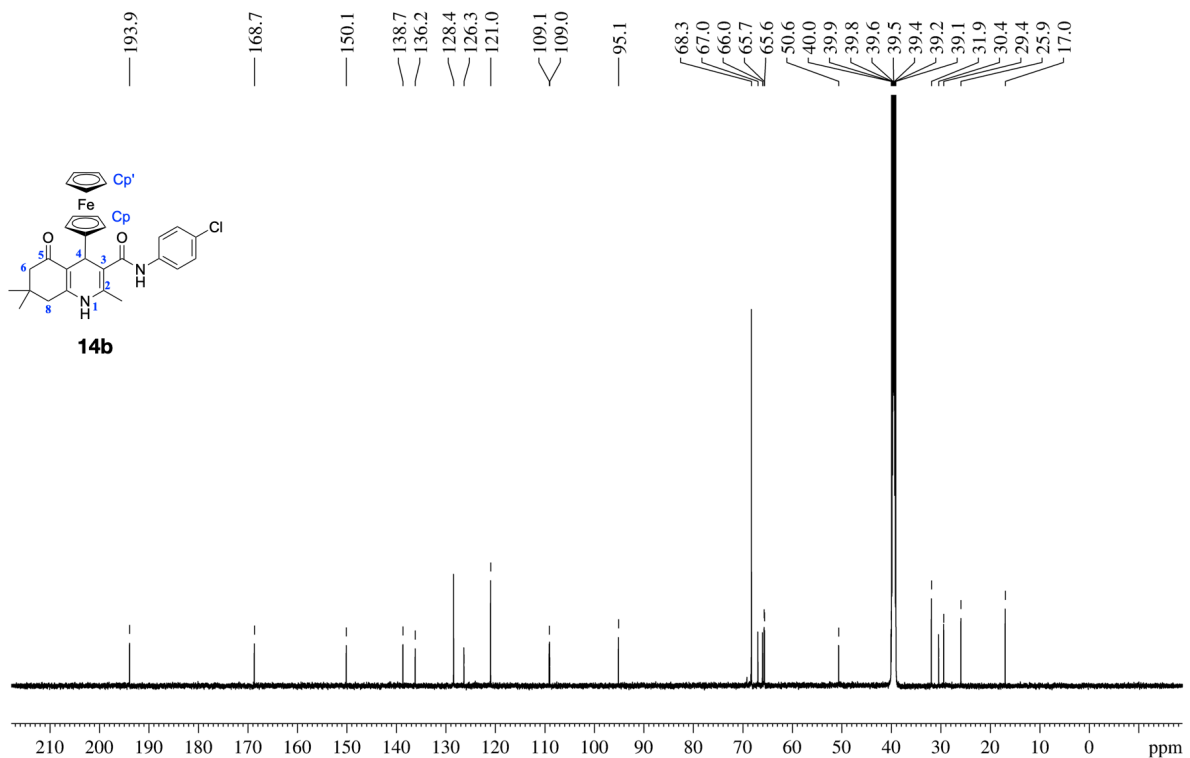

Figure S20. <sup>13</sup>C{<sup>1</sup>H} NMR spectrum of 14b in DMSO-d<sub>6</sub>

Sample Information  
 Sample Type : Unknown  
 Sample Name : K GK-00530b  
 Sample ID : K GK-00530b  
 Vial# : 42  
 Injection Volume : 0.3

Method  
 <<LC Time Program>>  
 Time : 4.00  
 7.00  
 7.05  
 13.00  
 Module : Pumps  
 Pumps  
 Pumps  
 Controller  
 Command : B.Conc  
 B.Conc  
 B.Conc  
 Stop  
 Valu : 90  
 90  
 50

<<Column Information>>  
 Column Name : XB-C18  
 Column Length : 50 mm  
 Inner Diameter : 2.1 mm  
 <<Mobile Phase Name>>  
 Mobile Phase A : water+0.01%HCOOH  
 Mobile Phase B : Methanol+0.01%HCOOH  
 <<Data Acquisition>>  
 LC Stop Time : 13.00 min  
 <<Pump>>  
 Total Flow : 0.3000 mL/min

Peak Table

| Peak# | Ret. Time | Area%   |
|-------|-----------|---------|
| 1     | 6.975     | 97.965  |
| 2     | 7.827     | 0.755   |
| 3     | 8.178     | 0.931   |
| 4     | 8.321     | 0.349   |
| Total |           | 100.000 |

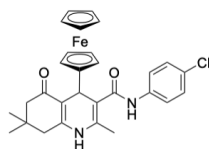

Chemical Formula: C<sub>29</sub>H<sub>29</sub>ClFeN<sub>4</sub>O<sub>2</sub>  
 Exact Mass: 528.1

**14b**

**Figure S21.** <sup>13</sup>C{<sup>1</sup>H} NMR spectrum of **14b** in DMSO-d<sub>6</sub>

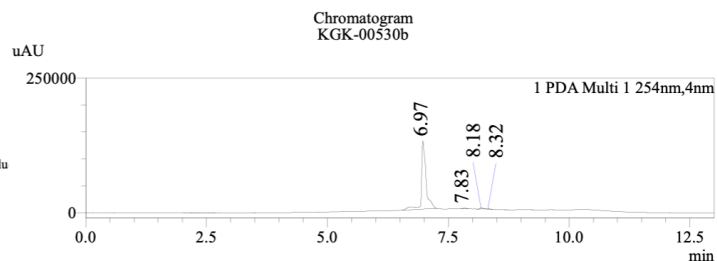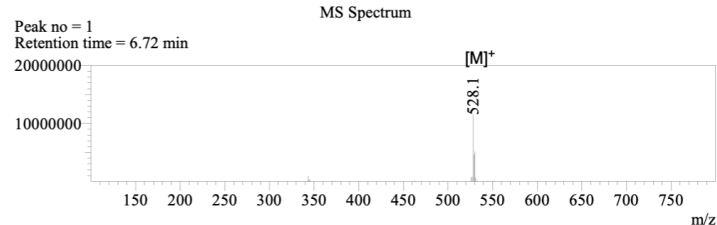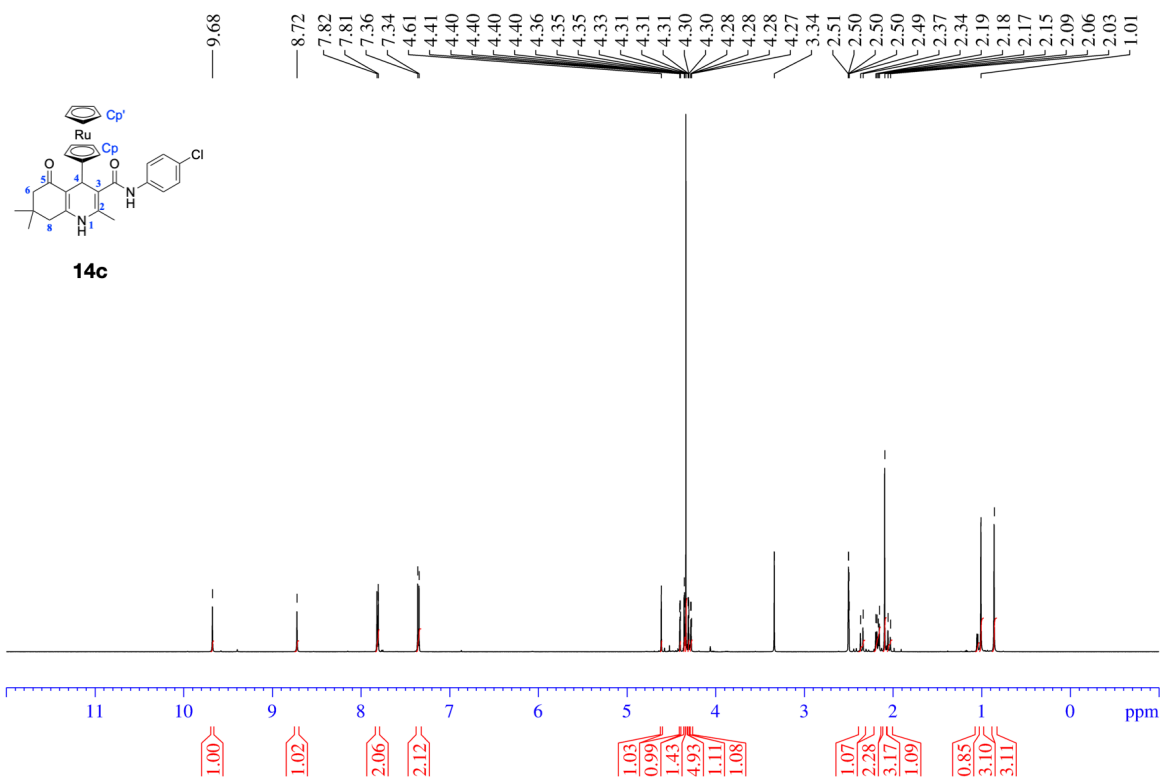

**Figure S22.** <sup>13</sup>C{<sup>1</sup>H} NMR spectrum of **14c** in DMSO-d<sub>6</sub>

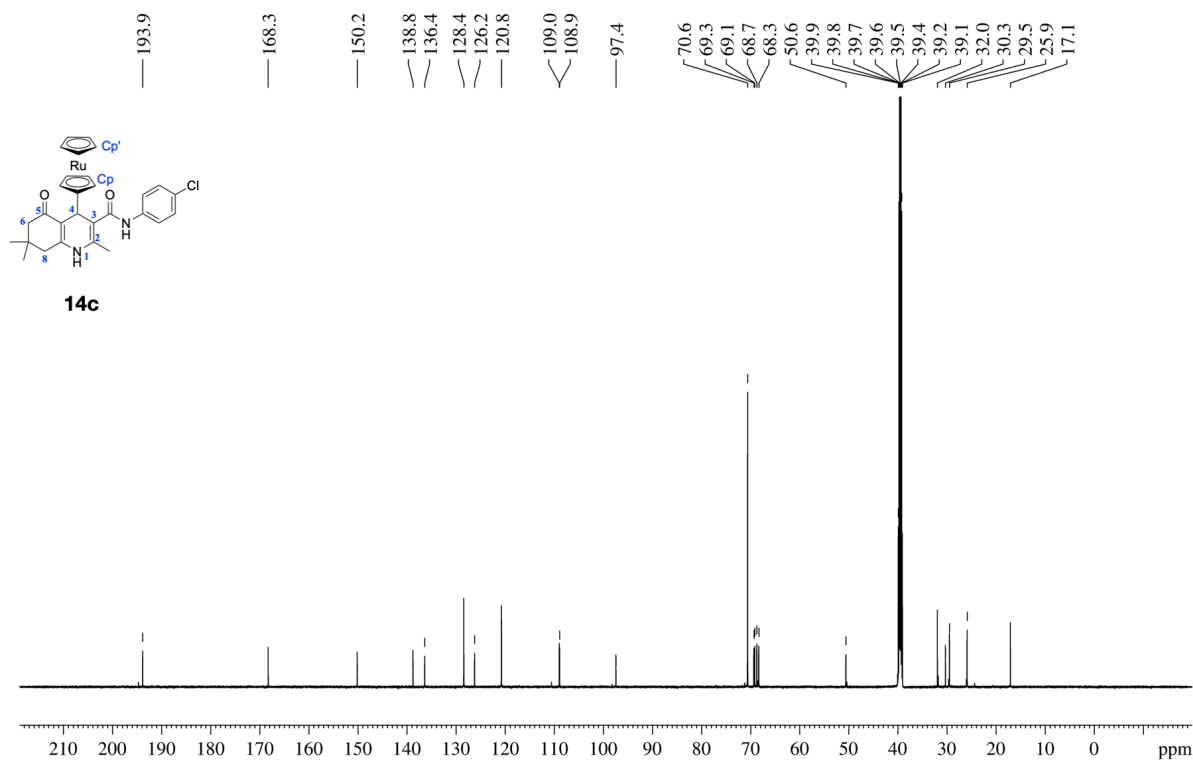

**Figure S23.**  $^{13}\text{C}\{^1\text{H}\}$  NMR spectrum of **14c** in  $\text{DMSO-}d_6$

Sample Information  
 Sample Type : Unknown  
 Sample Name : DPX-90033  
 Sample ID : DPX-90033  
 Vial# : 40  
 Injection Volume : 0.3

Method  
 <<LC Time Program>>  
 Time : 4.00 Module : Pumps Command : B.Conc  
 7.00 Pumps B.Conc  
 7.05 Pumps B.Conc  
 13.00 Controller Stop

<<Column Information>>  
 Column Name : XB-C18  
 Column Length : 50 mm  
 Inner Diameter : 2.1 mm

<<Mobile Phase Name>>  
 Mobile Phase A : water+0.01%HCOOH  
 Mobile Phase B : Methanol+0.01%HCOOH

<<Data Acquisition>>  
 LC Stop Time : 13.00 min

<<Pump>>  
 Total Flow : 0.3000 mL/min

Peak Table

| Peak# | Ret. Time | Area%   |
|-------|-----------|---------|
| 1     | 6.215     | 3.913   |
| 2     | 7.016     | 96.087  |
| Total |           | 100.000 |

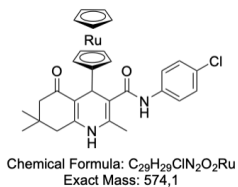

**14c**

**Figure S24.**  $^{13}\text{C}\{^1\text{H}\}$  NMR spectrum of **14c** in  $\text{DMSO-}d_6$

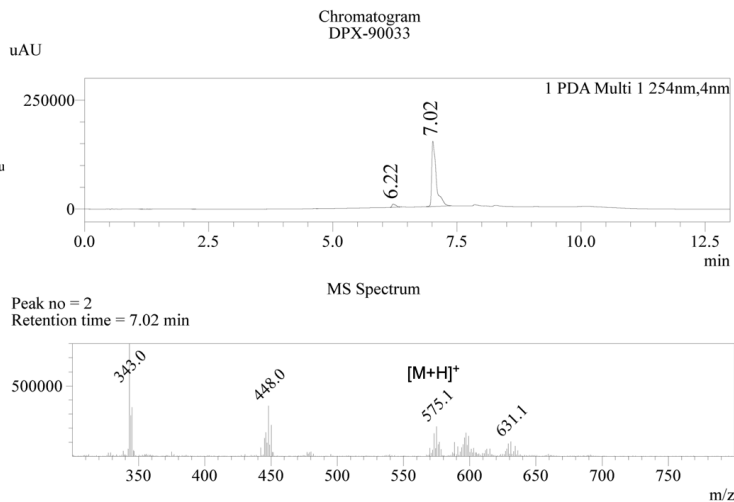

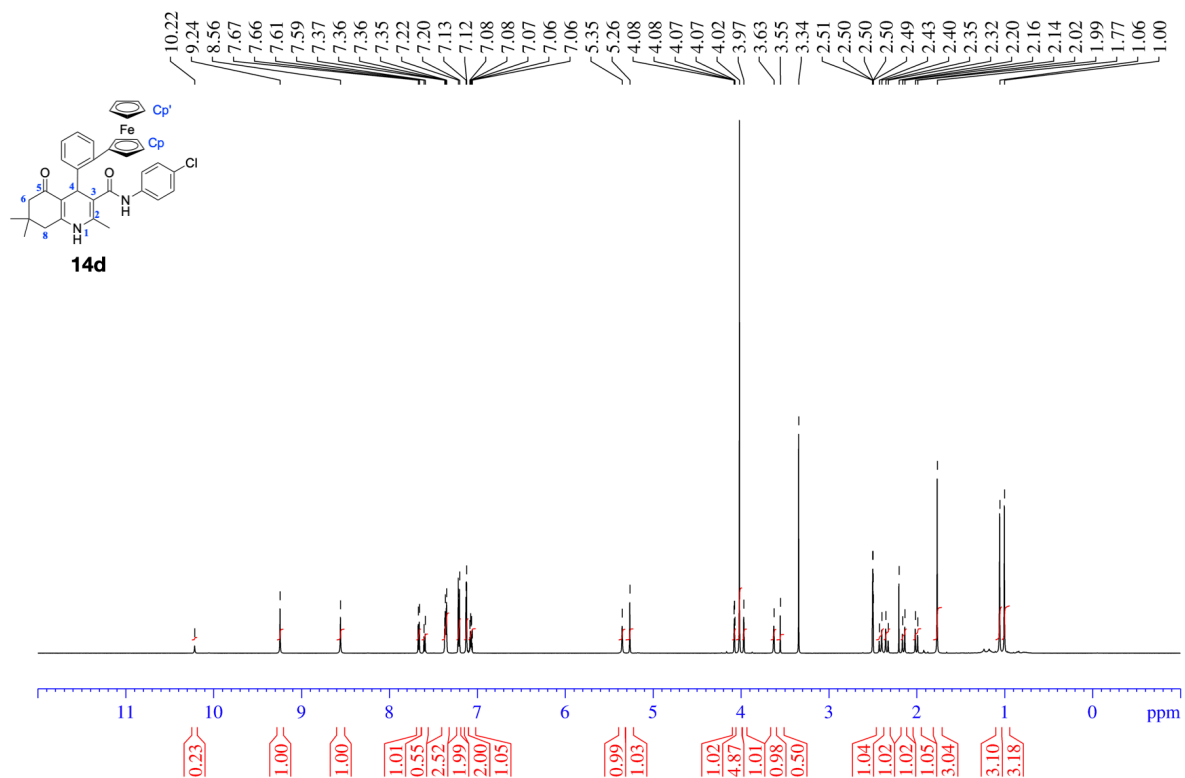

**Figure S25.**  $^{13}\text{C}\{^1\text{H}\}$  NMR spectrum of **14d** in  $\text{DMSO-d}_6$

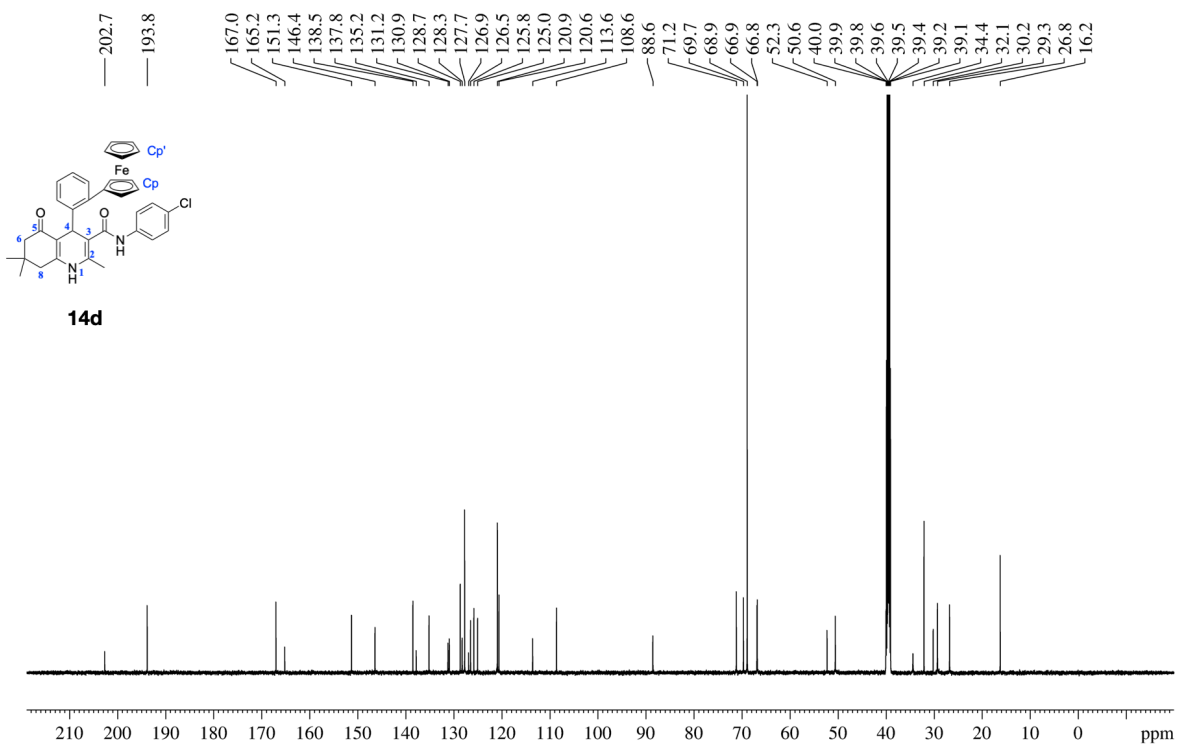

**Figure S26.**  $^{13}\text{C}\{^1\text{H}\}$  NMR spectrum of **14d** in  $\text{DMSO-d}_6$

Sample Information  
 Sample Type : Unknown  
 Sample Name : kgk-00526  
 Sample ID : kgk-00526  
 Vial# : 2  
 Injection Volume : 0.3

Method  
 <<LC Time Program>>  
 Time : 13.00  
 Module : Pumps  
 Pumps : B.Conc  
 Controller : Stop

<<Column Information>>  
 Column Name : XB-C18  
 Column Length : 50 mm  
 Inner Diameter : 2.1 mm

<<Mobile Phase Name>>  
 Mobile Phase A : water+0.01%HCOOH  
 Mobile Phase B : Methanol+0.01%HCOOH

<<Data Acquisition>>  
 LC Stop Time : 13.00 min

<<Pump>>  
 Total Flow : 0.3000 mL/min

Peak Table

| Peak# | Ret. Time | Area%   |
|-------|-----------|---------|
| 1     | 10.206    | 11.888  |
| 2     | 10.442    | 88.112  |
| Total |           | 100.000 |

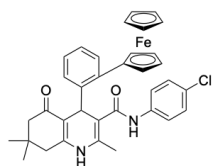

Chemical Formula: C<sub>35</sub>H<sub>33</sub>ClFeN<sub>2</sub>O<sub>2</sub>  
 Exact Mass: 604.2

14d

Figure S27. <sup>13</sup>C{<sup>1</sup>H} NMR spectrum of 14d in DMSO-d<sub>6</sub>

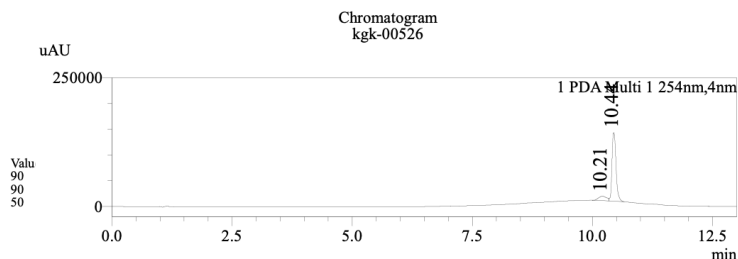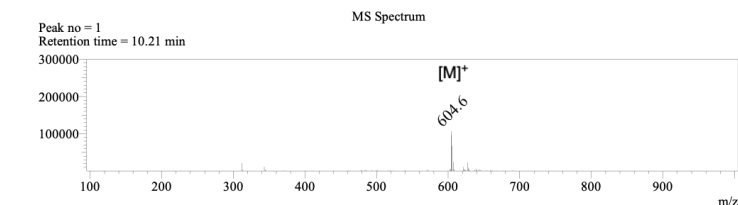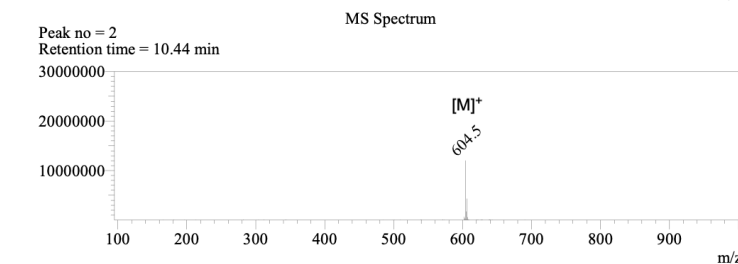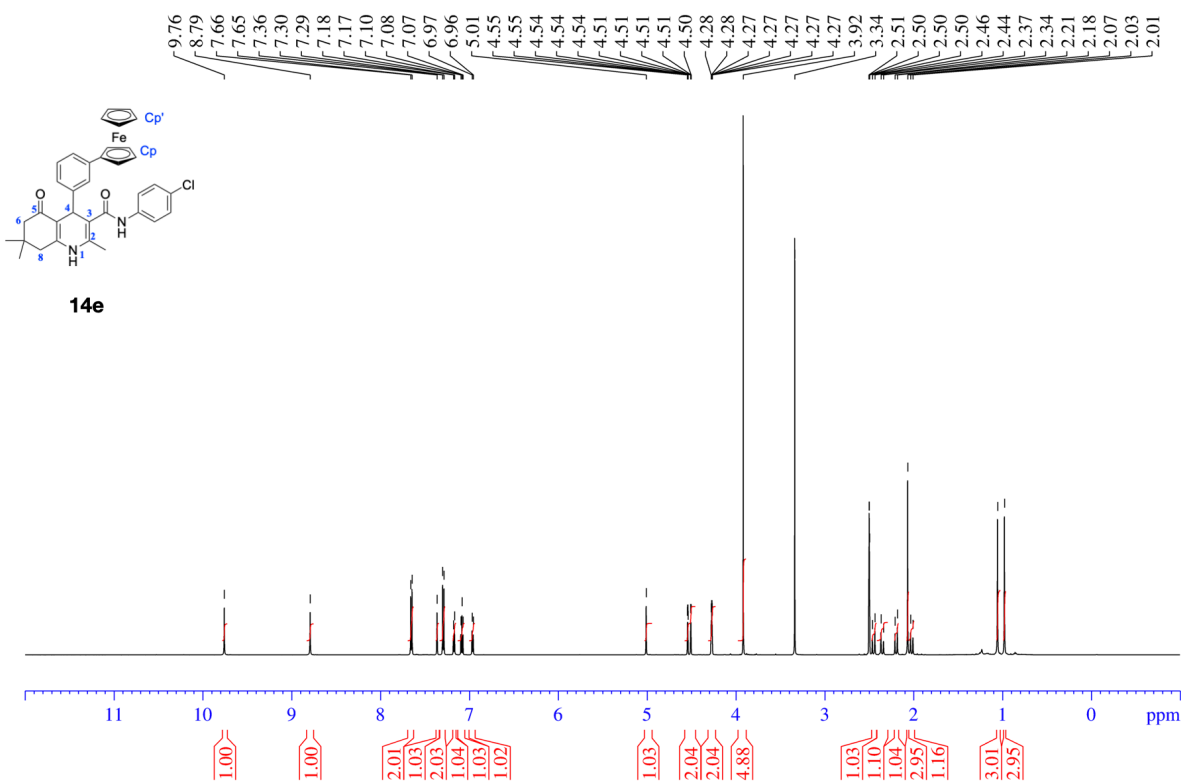

Figure S28. <sup>13</sup>C{<sup>1</sup>H} NMR spectrum of 14e in DMSO-d<sub>6</sub>

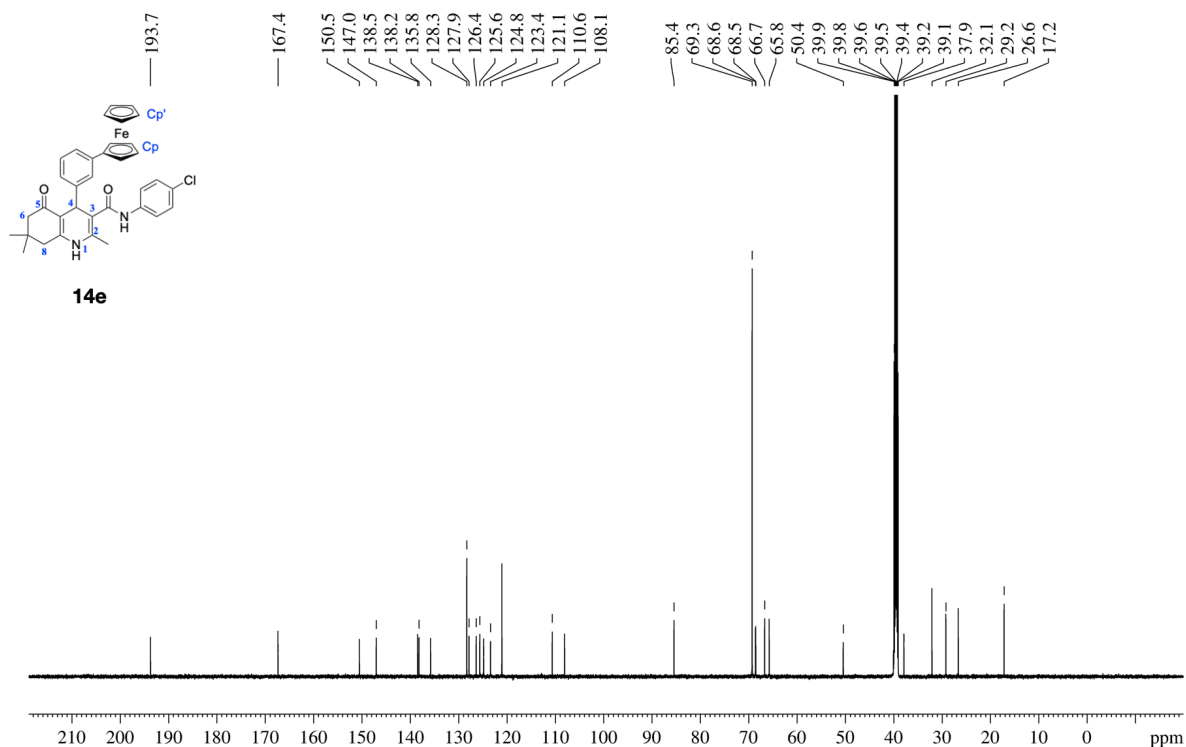

Figure S29.  $^{13}\text{C}\{^1\text{H}\}$  NMR spectrum of **14e** in  $\text{DMSO-d}_6$

Sample Information

Sample Type : Unknown  
 Sample Name : KGK-00525  
 Sample ID : KGK-00525  
 Vial# : 78  
 Injection Volume : 10

Method

| Time  | Module     | Command |
|-------|------------|---------|
| 4.00  | Pumps      | B.Conc  |
| 7.00  | Pumps      | B.Conc  |
| 7.00  | Pumps      | B.Conc  |
| 13.00 | Controller | Stop    |

<<Mobile Phase Name>>  
 Mobile Phase A : water+0.01% $\text{HCOOH}$   
 Mobile Phase B : Methanol+0.01% $\text{HCOOH}$

<<Data Acquisition>>  
 LC Stop Time : 13.00 min

<<Pump>>  
 Total Flow : 0.3000 mL/min

Peak Table

| Peak# | Ret. Time | Area%   |
|-------|-----------|---------|
| 1     | 8.524     | 8.786   |
| 2     | 8.658     | 91.214  |
| Total |           | 100.000 |

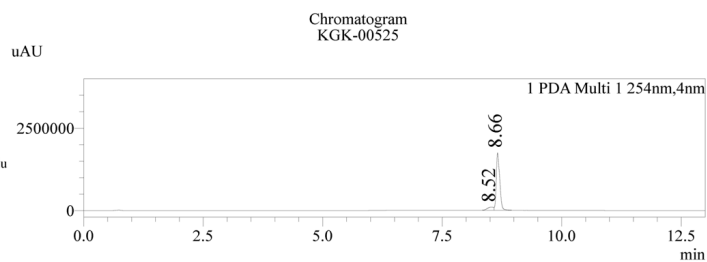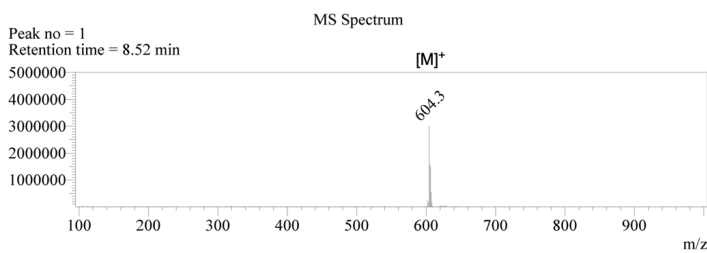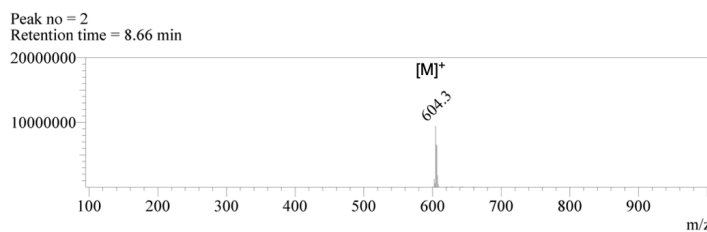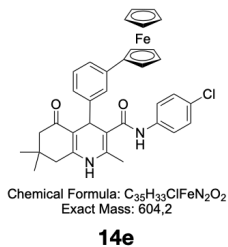

Figure S30.  $^{13}\text{C}\{^1\text{H}\}$  NMR spectrum of **14e** in  $\text{DMSO-d}_6$



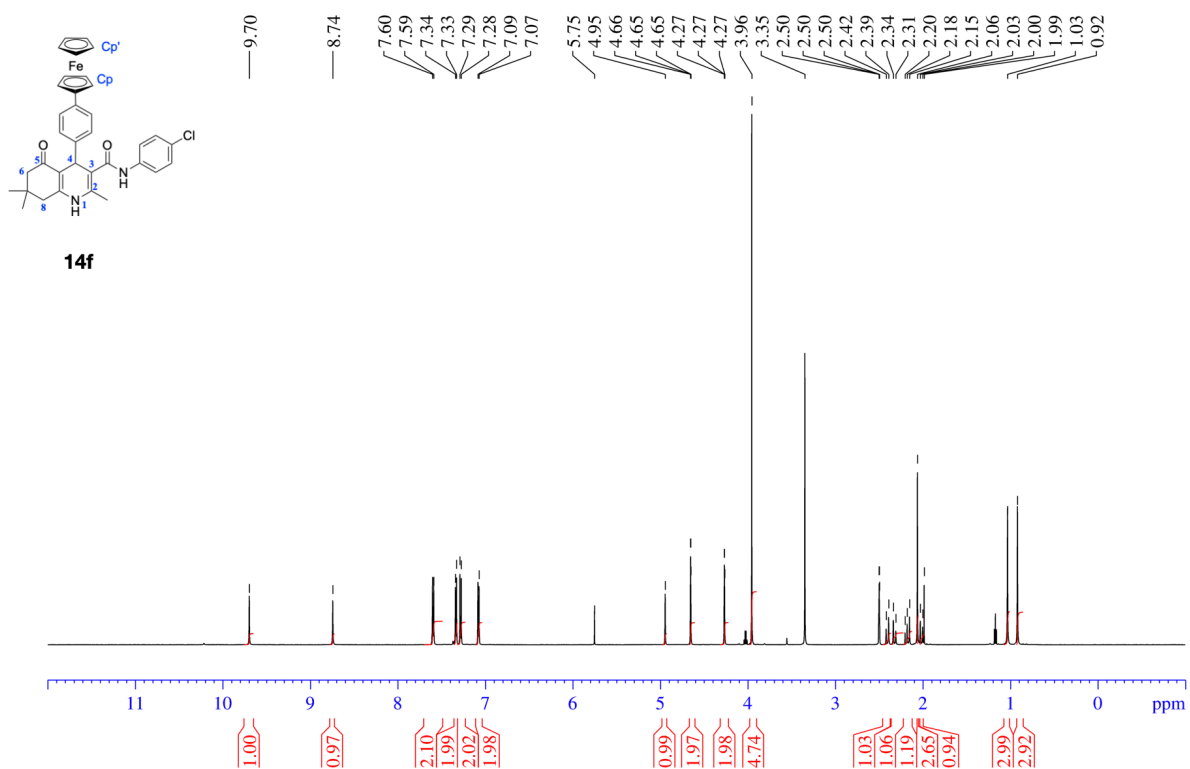

**Figure S31.**  $^{13}\text{C}\{^1\text{H}\}$  NMR spectrum of **14f** in  $\text{DMSO-d}_6$

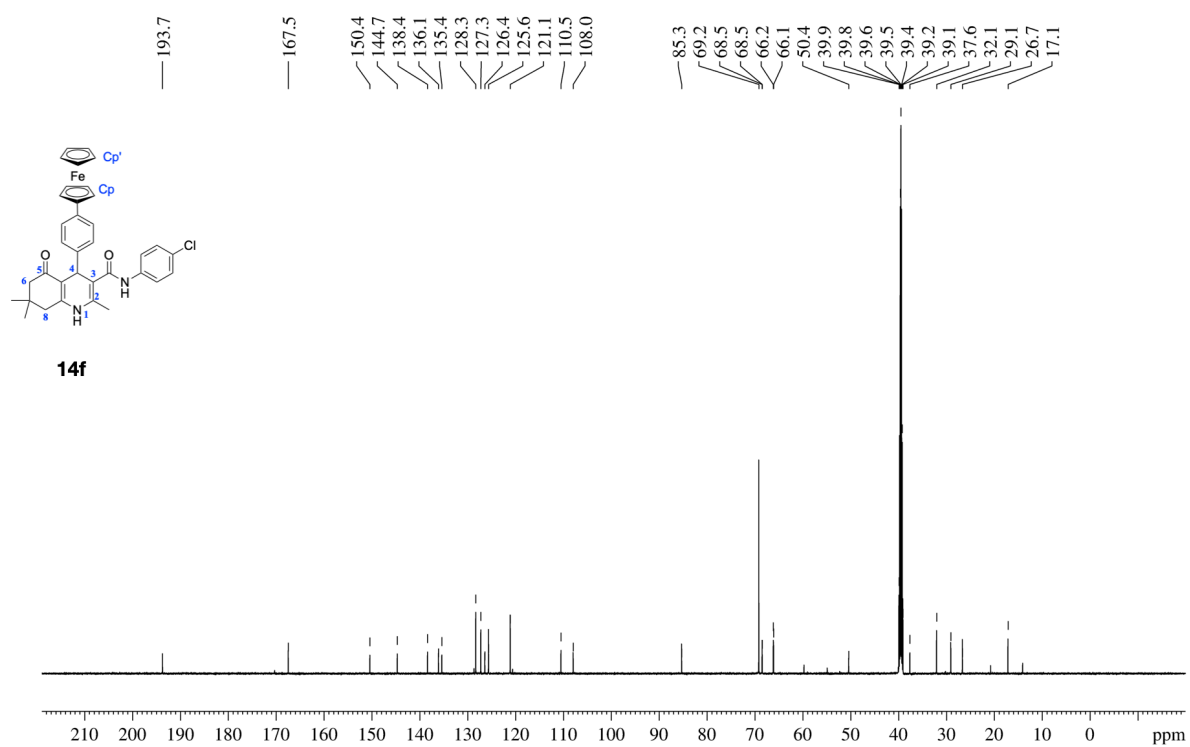

**Figure S32.**  $^{13}\text{C}\{^1\text{H}\}$  NMR spectrum of **14f** in  $\text{DMSO-d}_6$

Sample Information  
 Sample Type : Unknown  
 Sample Name : KGK-00524  
 Sample ID : KGK-00524  
 Vial# : 44  
 Injection Volume : 0.3

Method  
 <<LC Time Program>>  
 Time : 13.00  
 Module : Pumps  
 Pumps : Pumps  
 Controller : Controller  
 Command : B.Conc  
 B.Conc : B.Conc  
 B.Conc : B.Conc  
 Stop : Stop

<<Column Information>>  
 Column Name : XB-C18  
 Column Length : 50 mm  
 Inner Diameter : 2.1 mm  
 <<Mobile Phase Name>>  
 Mobile Phase A : water+0.01%HCOOH  
 Mobile Phase B : Methanol+0.01%HCOOH  
 <<Data Acquisition>>  
 LC Stop Time : 13.00 min  
 <<Pump>>  
 Total Flow : 0.3000 mL/min

Peak Table

| Peak# | Ret. Time | Area%   |
|-------|-----------|---------|
| 1     | 7.265     | 7.816   |
| 2     | 7.483     | 92.184  |
| Total |           | 100.000 |

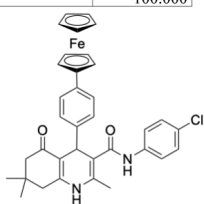

Chemical Formula: C<sub>35</sub>H<sub>35</sub>ClFeN<sub>2</sub>O<sub>2</sub>  
 Exact Mass: 604.2

**14f**

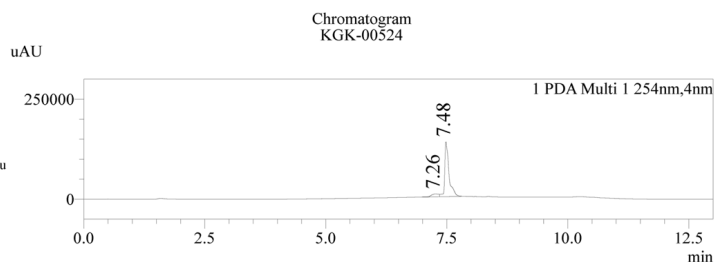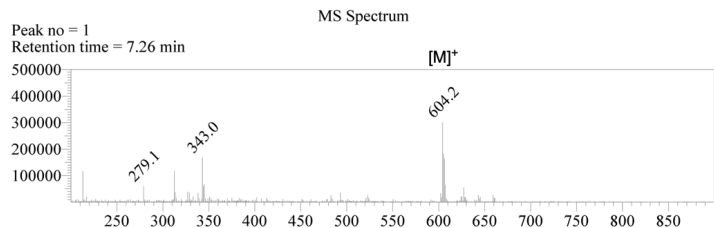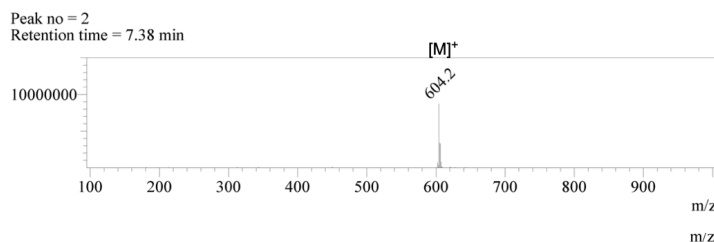

**Figure S33.** <sup>13</sup>C{<sup>1</sup>H} NMR spectrum of **14f** in DMSO-d<sub>6</sub>

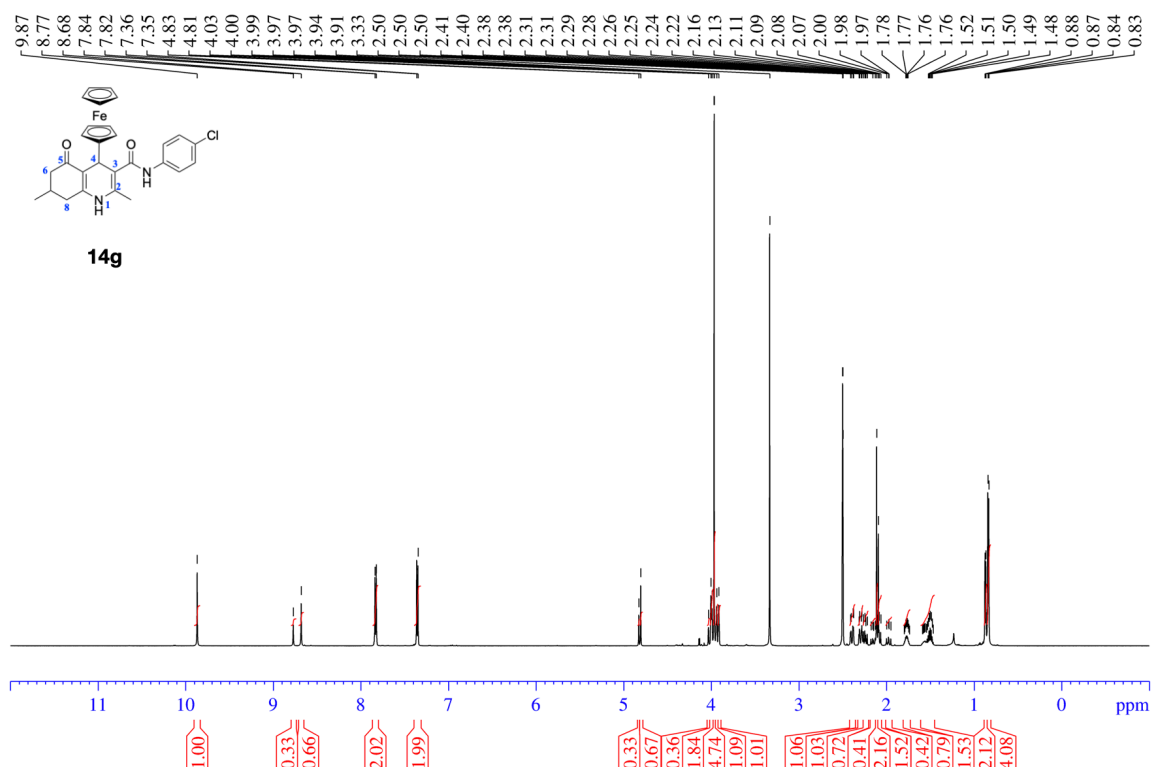

**Figure S34.** <sup>13</sup>C{<sup>1</sup>H} NMR spectrum of **14g** in DMSO-d<sub>6</sub>

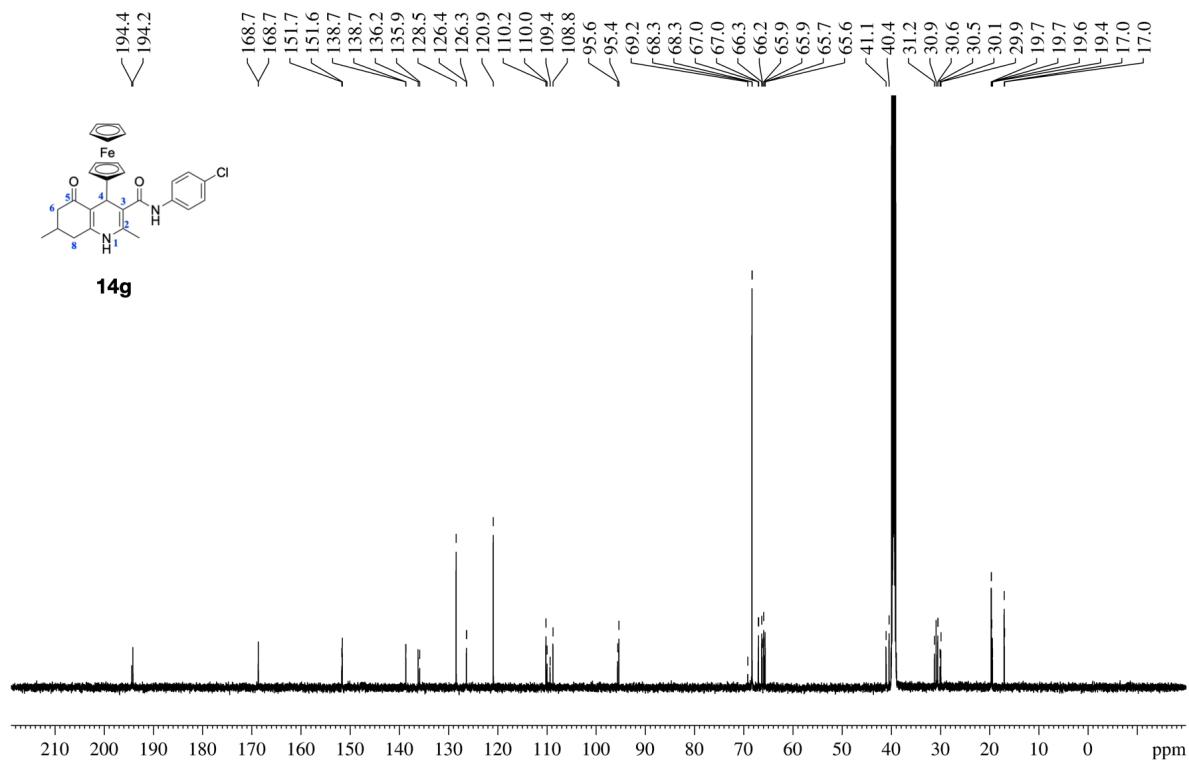

Figure S35.  $^{13}\text{C}\{^1\text{H}\}$  NMR spectrum of **14g** in  $\text{DMSO-}d_6$

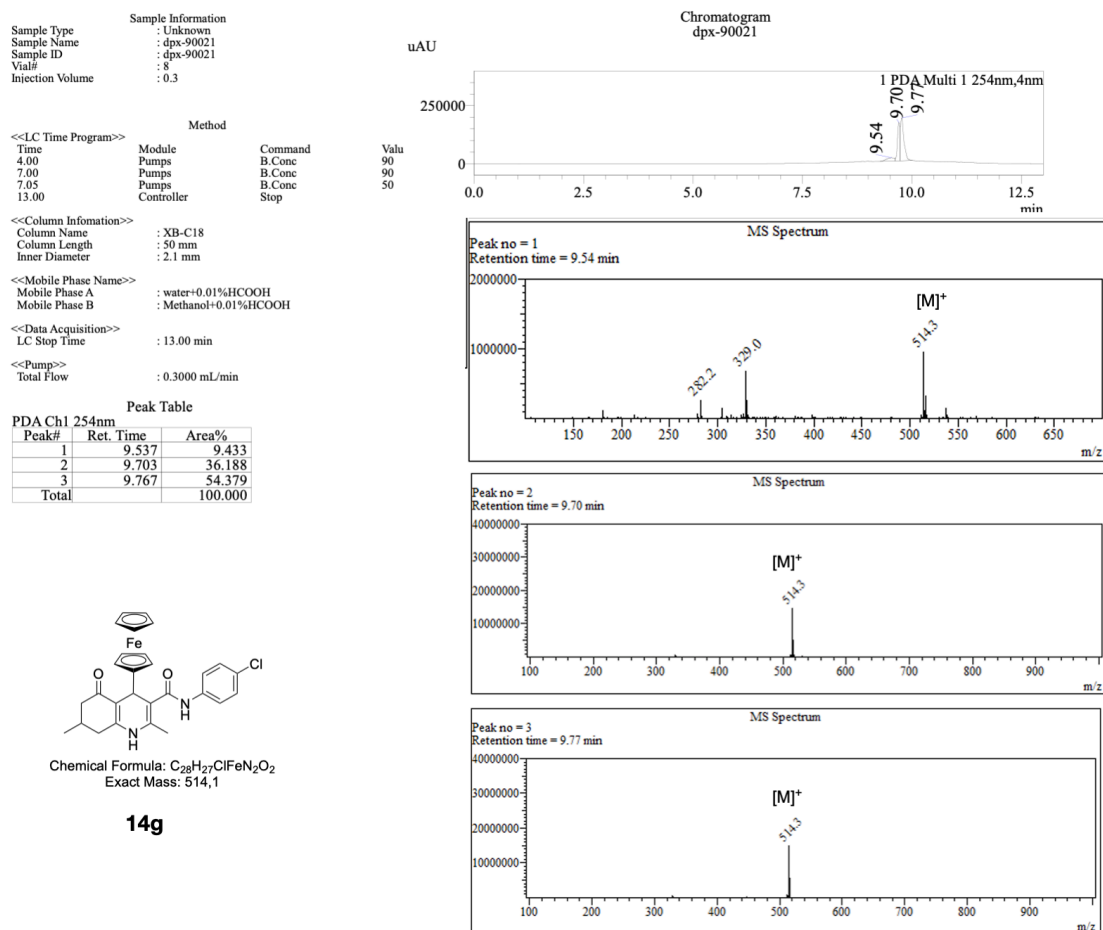

Figure S36.  $^{13}\text{C}\{^1\text{H}\}$  NMR spectrum of **14g** in  $\text{DMSO-}d_6$

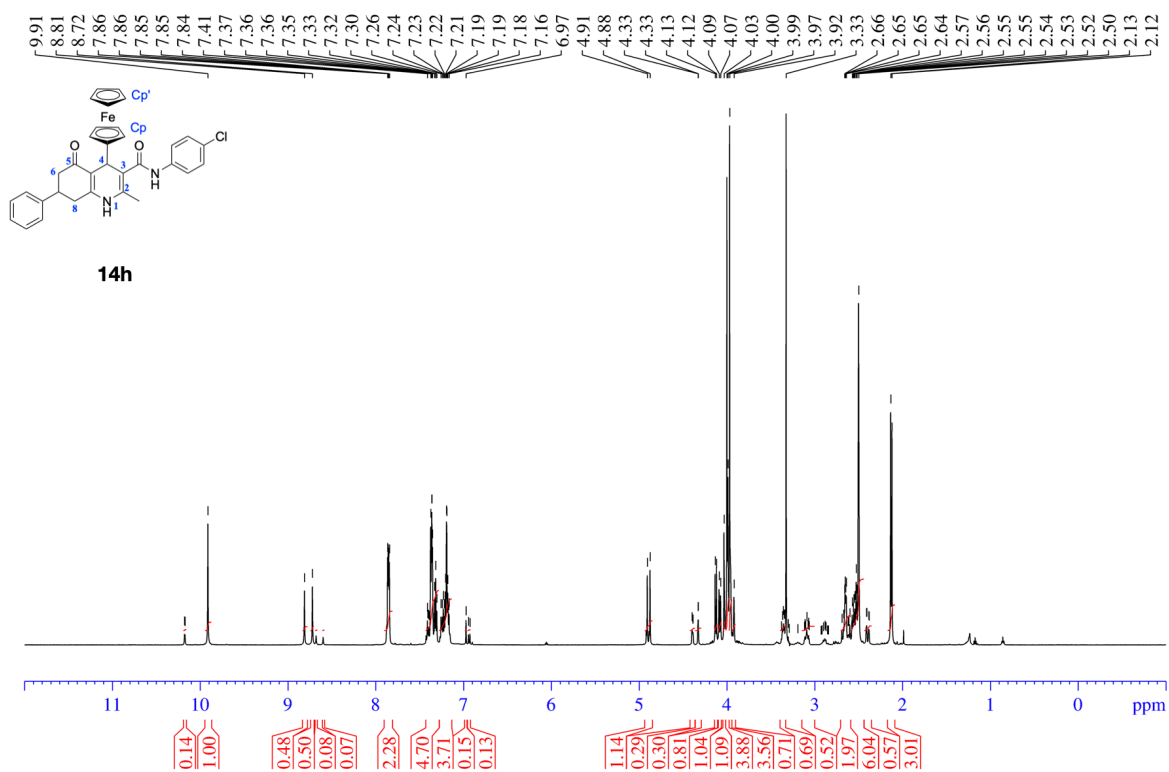

**Figure S37.**  $^{13}\text{C}\{^1\text{H}\}$  NMR spectrum of **14h** in DMSO- $\text{d}_6$

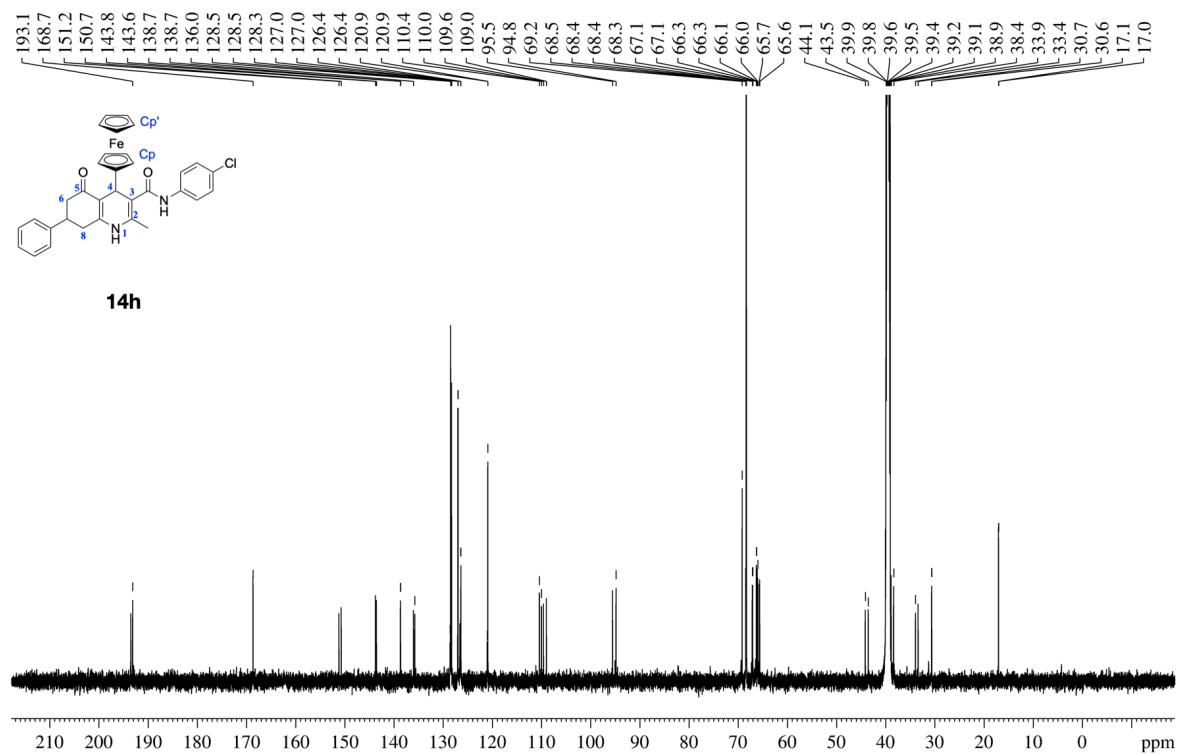

**Figure S38.**  $^{13}\text{C}\{^1\text{H}\}$  NMR spectrum of **14h** in DMSO- $\text{d}_6$

Sample Information  
 Sample Type : Unknown  
 Sample Name : DPX-90024pwt  
 Sample ID : DPX-90024pwt  
 Vial# : 90  
 Injection Volume : 0.5

Method  
 <<LC Time Program>>  
 Time : 13.00  
 Module : Pumps  
 Command : B.Conc  
 Pumps : B.Conc  
 Pumps : B.Conc  
 Controller : Stop

<<Column Information>>  
 Column Name : XB-C18  
 Column Length : 50 mm  
 Inner Diameter : 2.1 mm

<<Mobile Phase Name>>  
 Mobile Phase A : water+0.01%HCOOH  
 Mobile Phase B : Methanol+0.01%HCOOH

<<Data Acquisition>>  
 LC Stop Time : 13.00 min

<<Pump>>  
 Total Flow : 0.3000 mL/min

| Peak# | Ret. Time | Area%   |
|-------|-----------|---------|
| 1     | 7.477     | 7.797   |
| 2     | 7.614     | 40.424  |
| 3     | 7.713     | 51.779  |
| Total |           | 100.000 |

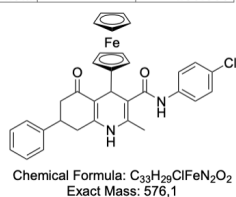

14h

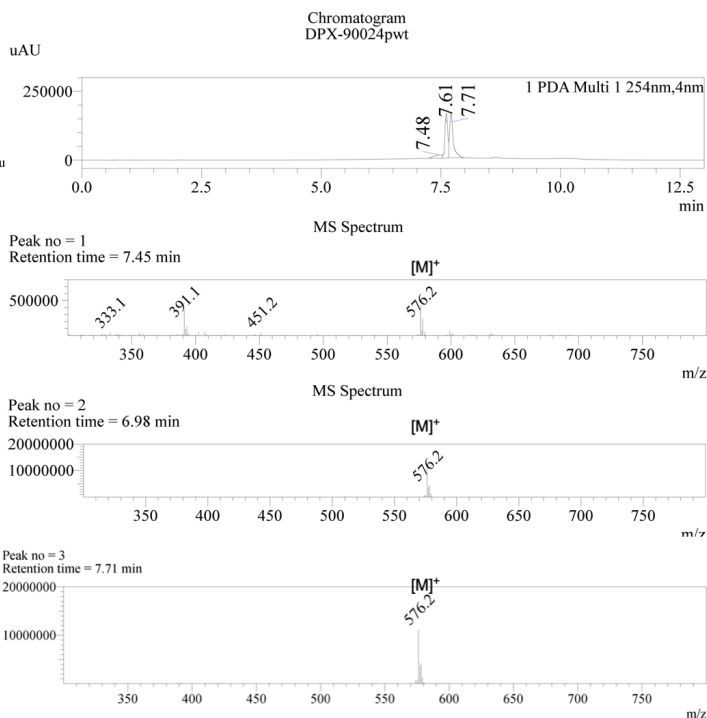

Figure S39. <sup>13</sup>C{<sup>1</sup>H} NMR spectrum of 14h in DMSO-d<sub>6</sub>

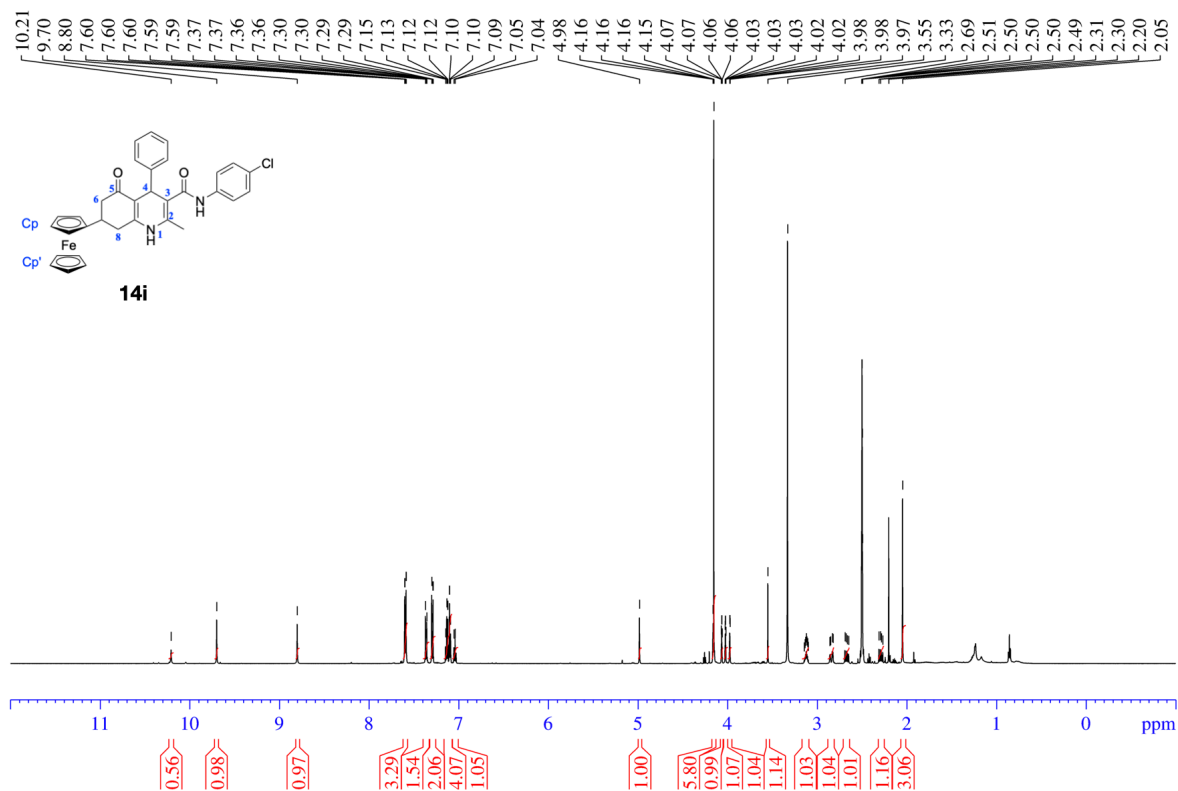

Figure S40. <sup>13</sup>C{<sup>1</sup>H} NMR spectrum of 14i in DMSO-d<sub>6</sub>

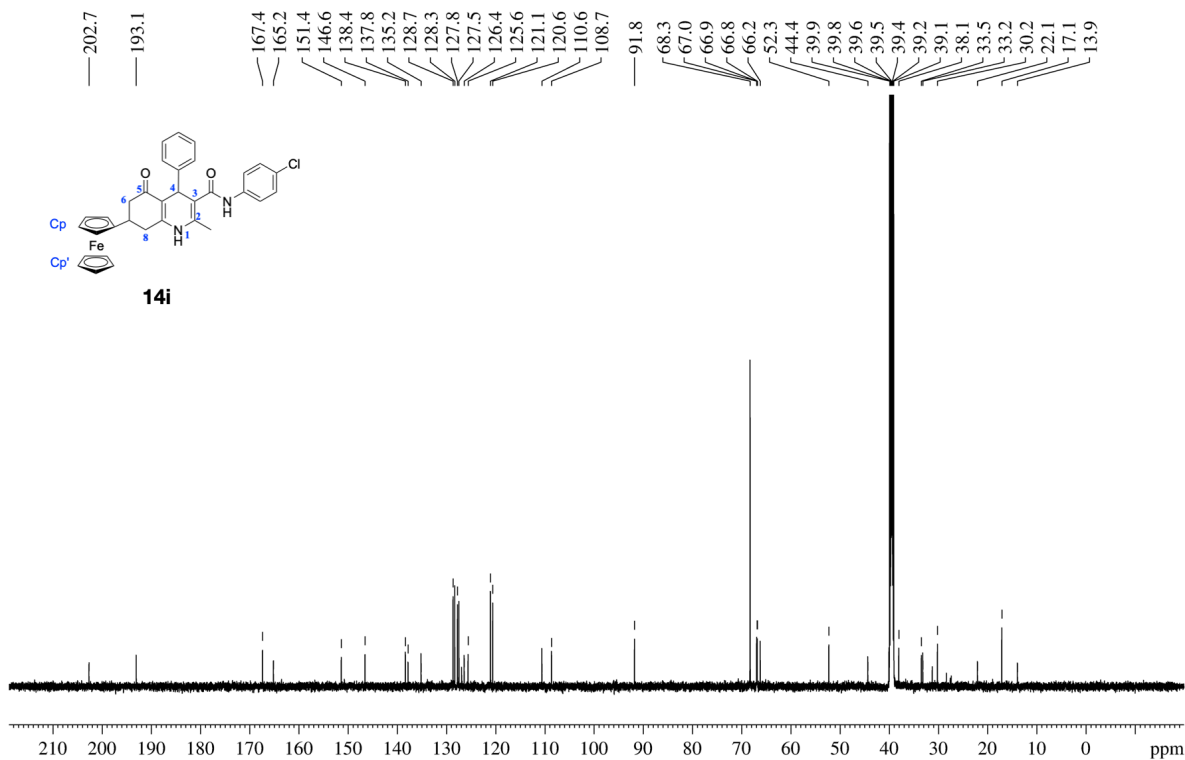

Figure S41.  $^{13}\text{C}\{^1\text{H}\}$  NMR spectrum of **14i** in  $\text{DMSO-d}_6$

Sample Information  
 Sample Type : Unknown  
 Sample Name : kgk-90026\_MeOH\_5-9-5  
 Sample ID : kgk-90026\_MeOH\_5-9-3  
 Vial# : 103  
 Injection Volume : 0.5

Method  
 <<LC Time Program>>  
 Time : 4.00, 7.00, 7.05, 13.00  
 Module : Pumps, Pumps, Pumps, Controller  
 Command : B.Conc, B.Conc, B.Conc, Stop

Mobile Phase Name  
 Mobile Phase A : water+0.01%HCOOH  
 Mobile Phase B : Methanol+0.01%HCOOH

Data Acquisition  
 LC Stop Time : 13.00 min

Pump  
 Total Flow : 0.3000 mL/min

| Peak Table |           |         |
|------------|-----------|---------|
| Peak#      | Ret. Time | Area%   |
| 1          | 7.911     | 100.000 |
| Total      |           | 100.000 |

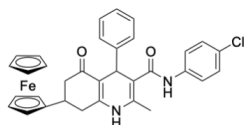

Chemical Formula:  $\text{C}_{33}\text{H}_{29}\text{ClFeN}_2\text{O}_2$   
 Exact Mass: 576.1

**14i**

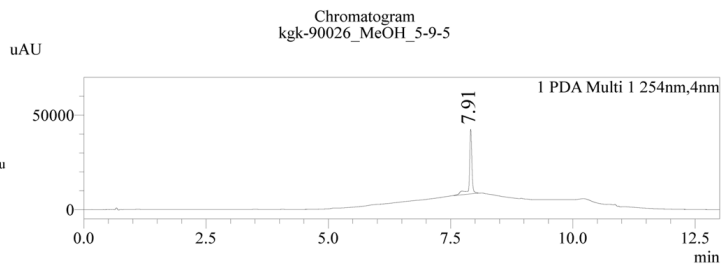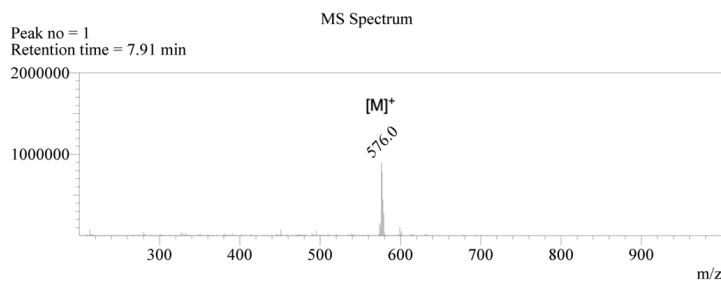

Figure S42.  $^{13}\text{C}\{^1\text{H}\}$  NMR spectrum of **14i** in  $\text{DMSO-d}_6$

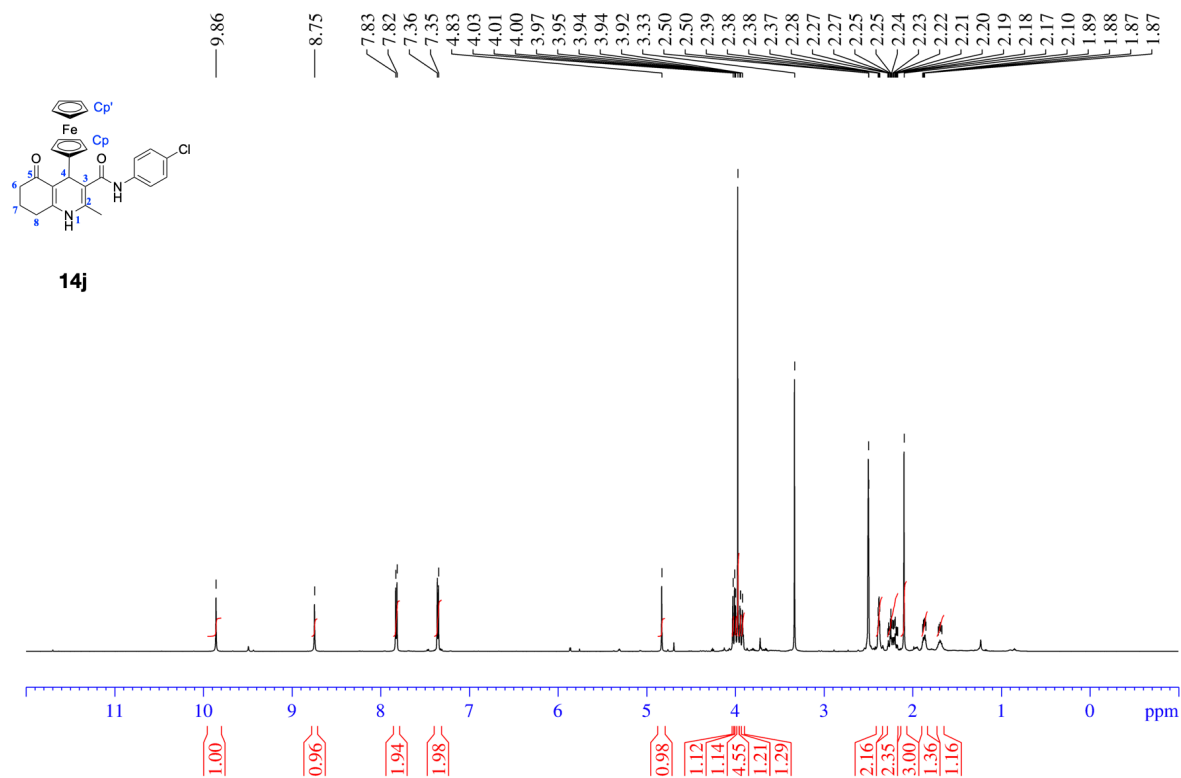

Figure S43.  $^{13}\text{C}\{^1\text{H}\}$  NMR spectrum of **14j** in  $\text{DMSO-d}_6$

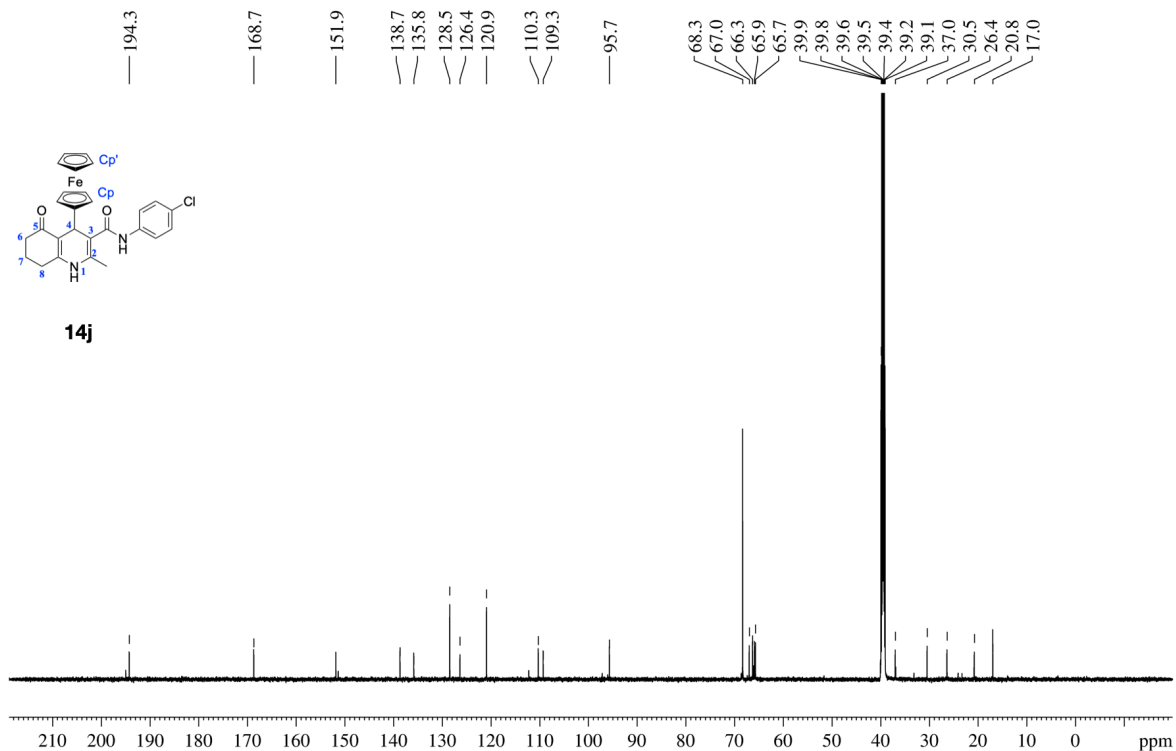

Figure S44.  $^{13}\text{C}\{^1\text{H}\}$  NMR spectrum of **14j** in  $\text{DMSO-d}_6$

Sample Information  
 Sample Type : Unknown  
 Sample Name : dhp-90025\_pwt dp  
 Sample ID : dhp-90025\_pwt dp  
 Vial# : 15  
 Injection Volume : 0.3

Method  
 <<LC Time Program>>  
 Time : 4.00  
 7.00  
 7.05  
 13.00  
 Module : Pumps  
 Pumps  
 Pumps  
 Controller  
 Command : B.Conc  
 B.Conc  
 B.Conc  
 Stop  
 V  
 9  
 9  
 5

<<Column Information>>  
 Column Name : XB-C18  
 Column Length : 50 mm  
 Inner Diameter : 2.1 mm  
 <<Mobile Phase Name>>  
 Mobile Phase A : water+0.01%HCOOH  
 Mobile Phase B : Methanol+0.01%HCOOH

<<Data Acquisition>>  
 LC Stop Time : 13.00 min

<<Pump>>  
 Total Flow : 0.3000 mL/min

Peak Table

| Peak# | Ret. Time | Area%   |
|-------|-----------|---------|
| 1     | 5.034     | 2.217   |
| 2     | 7.189     | 95.164  |
| 3     | 8.389     | 2.619   |
| Total |           | 100.000 |

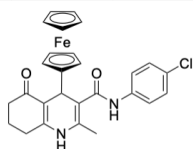

Chemical Formula: C<sub>27</sub>H<sub>25</sub>ClFeN<sub>2</sub>O<sub>2</sub>  
 Exact Mass: 500,1

14j

Chromatogram  
 dhp-90025\_pwt dp

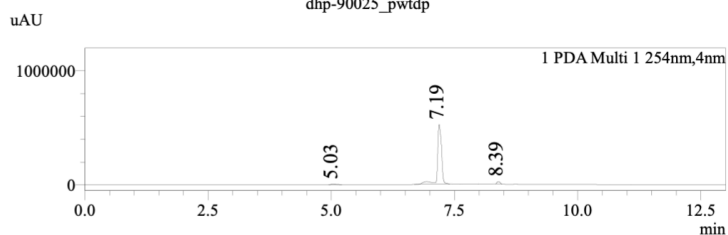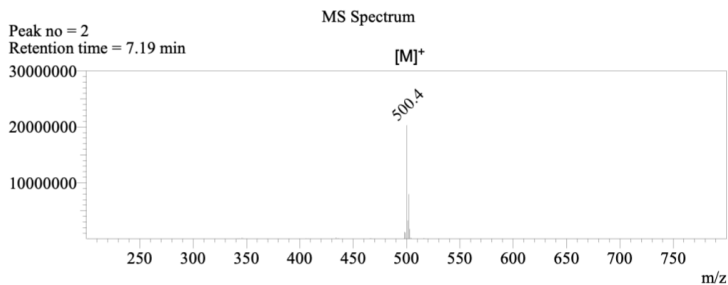

Figure S45. <sup>13</sup>C{<sup>1</sup>H} NMR spectrum of 14j in DMSO-d<sub>6</sub>

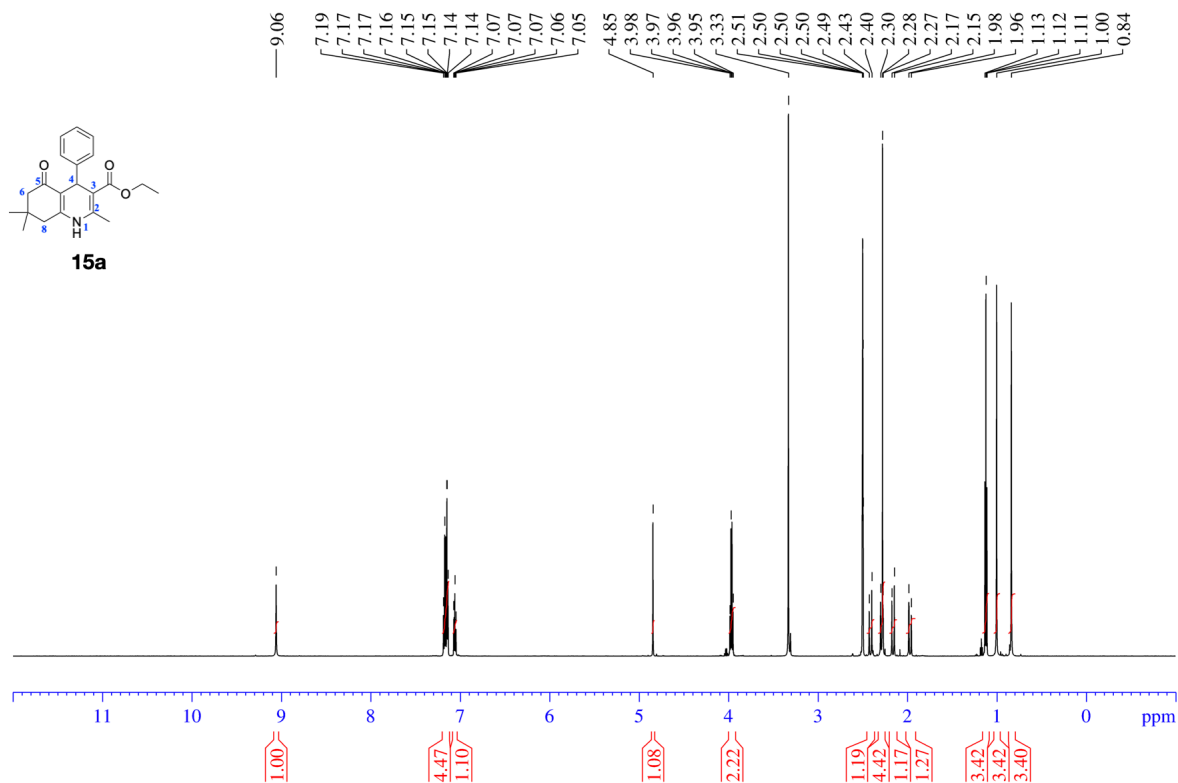

Figure S46. <sup>13</sup>C{<sup>1</sup>H} NMR spectrum of 15a in DMSO-d<sub>6</sub>



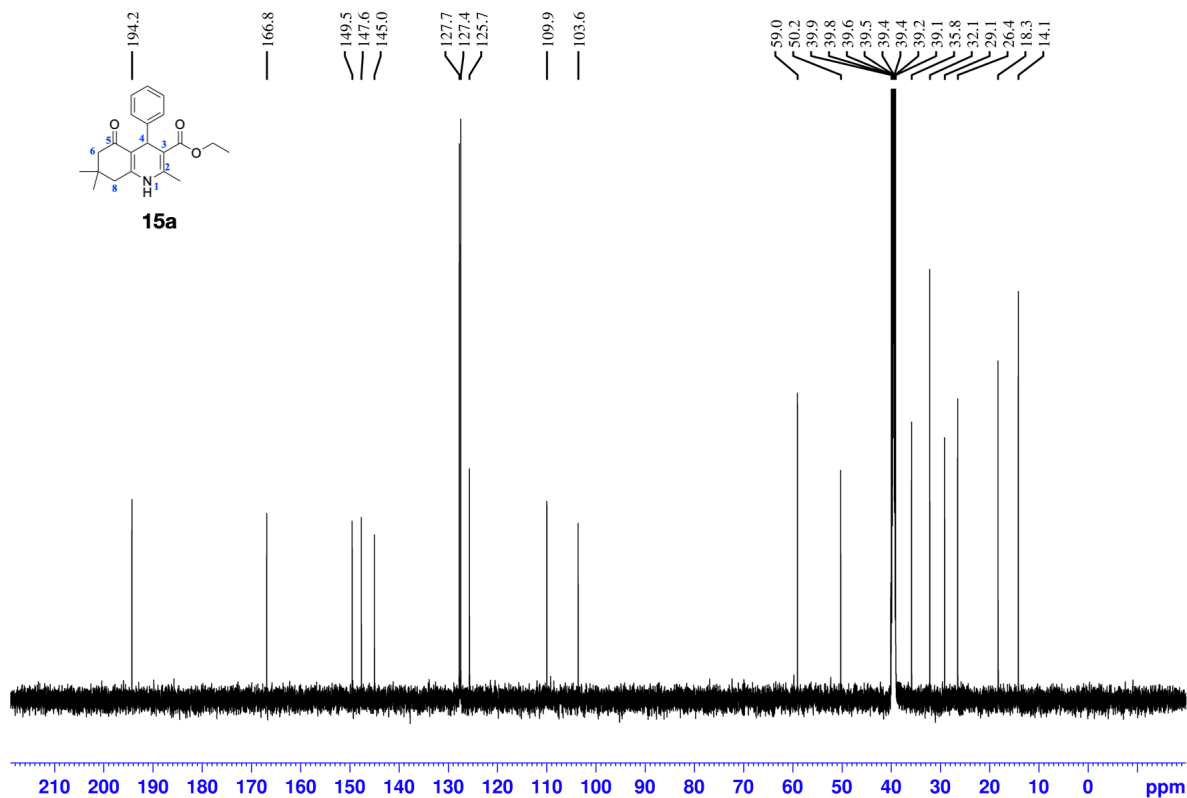

Figure S47.  $^{13}\text{C}\{^1\text{H}\}$  NMR spectrum of **15a** in  $\text{DMSO-d}_6$

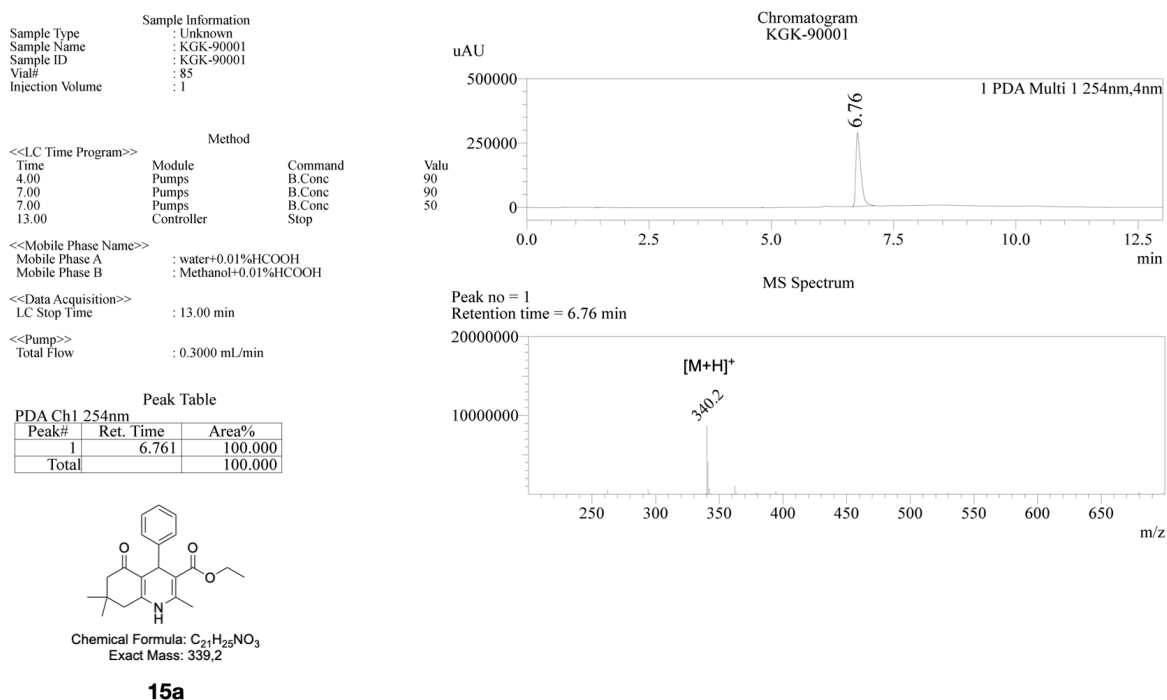

Figure S48.  $^{13}\text{C}\{^1\text{H}\}$  NMR spectrum of **15a** in  $\text{DMSO-d}_6$

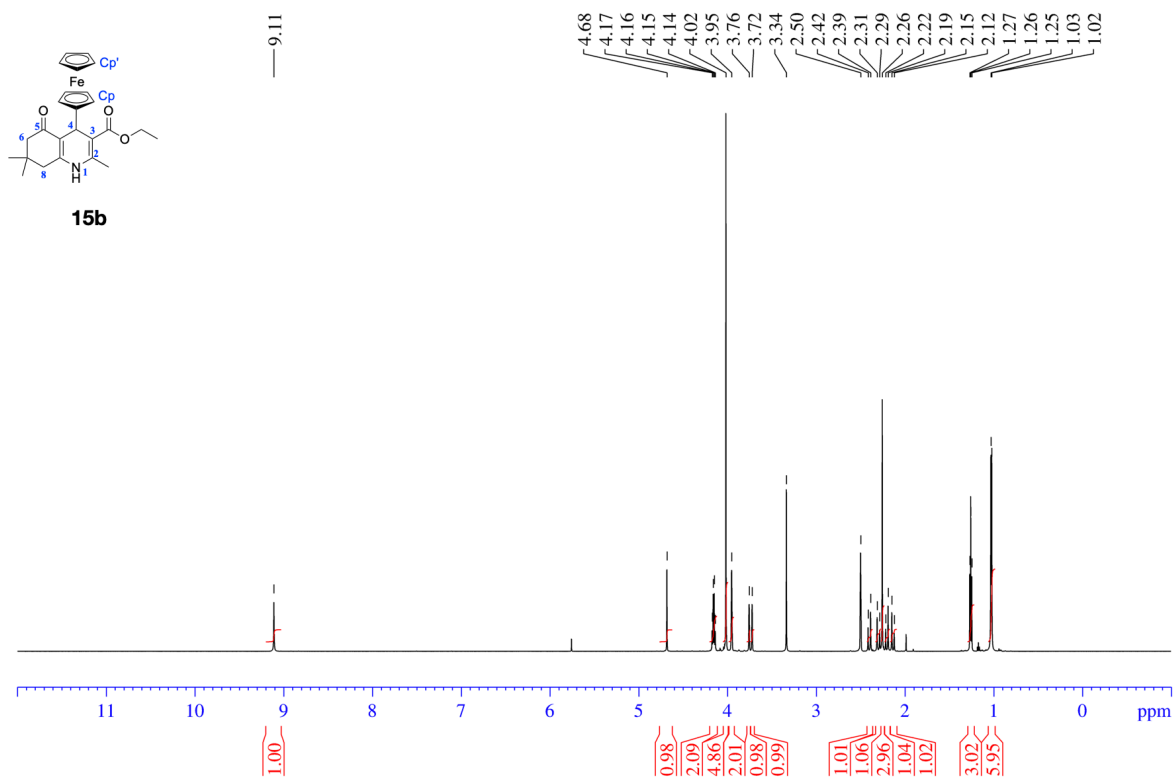

**Figure S49.**  $^{13}\text{C}\{^1\text{H}\}$  NMR spectrum of **15b** in  $\text{DMSO-d}_6$

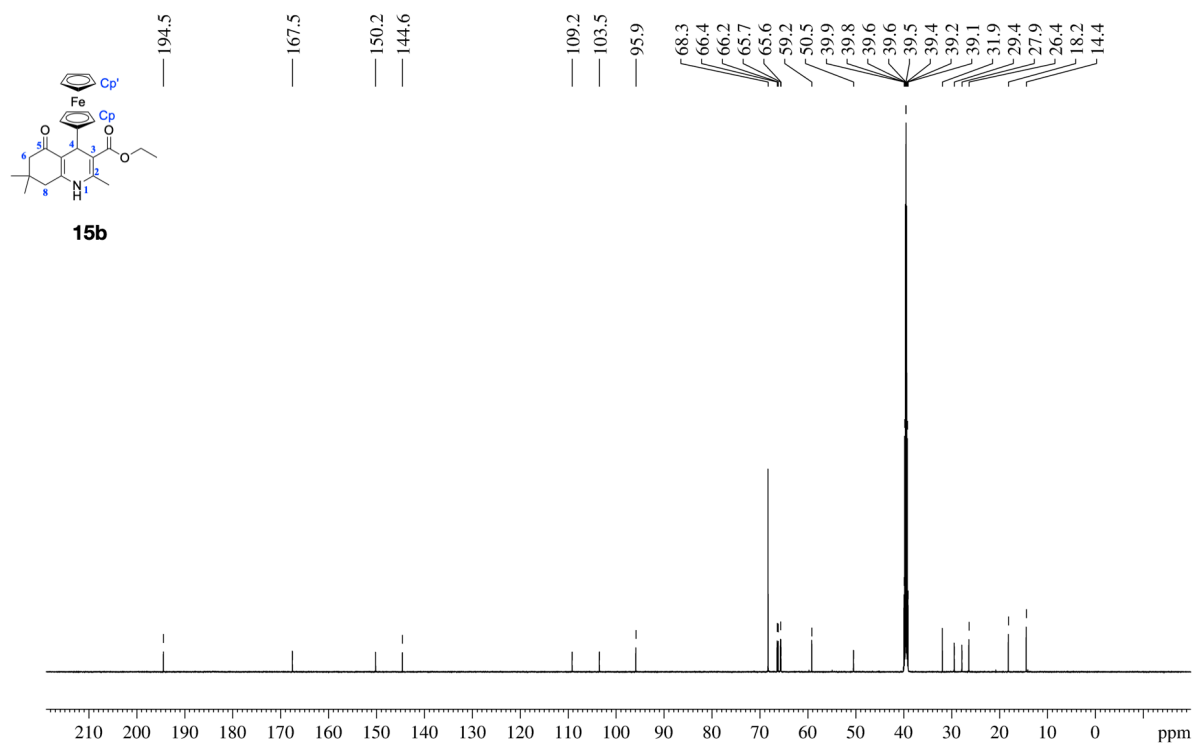

**Figure S50.**  $^{13}\text{C}\{^1\text{H}\}$  NMR spectrum of **15b** in  $\text{DMSO-d}_6$

Sample Information  
 Sample Type : Unknown  
 Sample Name : kgk-00529  
 Sample ID : kgk-00529a  
 Vial# : 102  
 Injection Volume : 0.3

Method  
 <<LC Time Program>>  
 Time : 13.00  
 Module : Pumps  
 Command : B.Conc  
 Pumps : B.Conc  
 Pumps : B.Conc  
 Controller : Stop

<<Column Information>>  
 Column Name : XB-C18  
 Column Length : 50 mm  
 Inner Diameter : 2.1 mm

<<Mobile Phase Name>>  
 Mobile Phase A : water+0.01%HCOOH  
 Mobile Phase B : Methanol+0.01%HCOOH

<<Data Acquisition>>  
 LC Stop Time : 13.00 min

<<Pump>>  
 Total Flow : 0.3000 mL/min

Peak Table

| Peak# | Ret. Time | Area%   |
|-------|-----------|---------|
| 1     | 6.412     | 100.000 |
| Total |           | 100.000 |

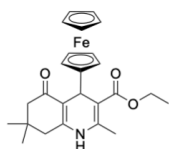

Chemical Formula: C<sub>25</sub>H<sub>29</sub>FeNO<sub>3</sub>  
 Exact Mass: 447,1

**15b**

**Figure S51.** <sup>13</sup>C{<sup>1</sup>H} NMR spectrum of **15b** in DMSO-d<sub>6</sub>

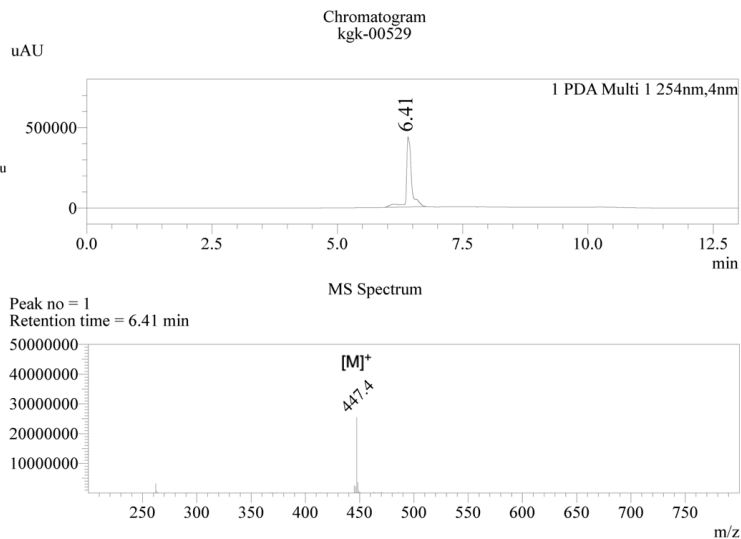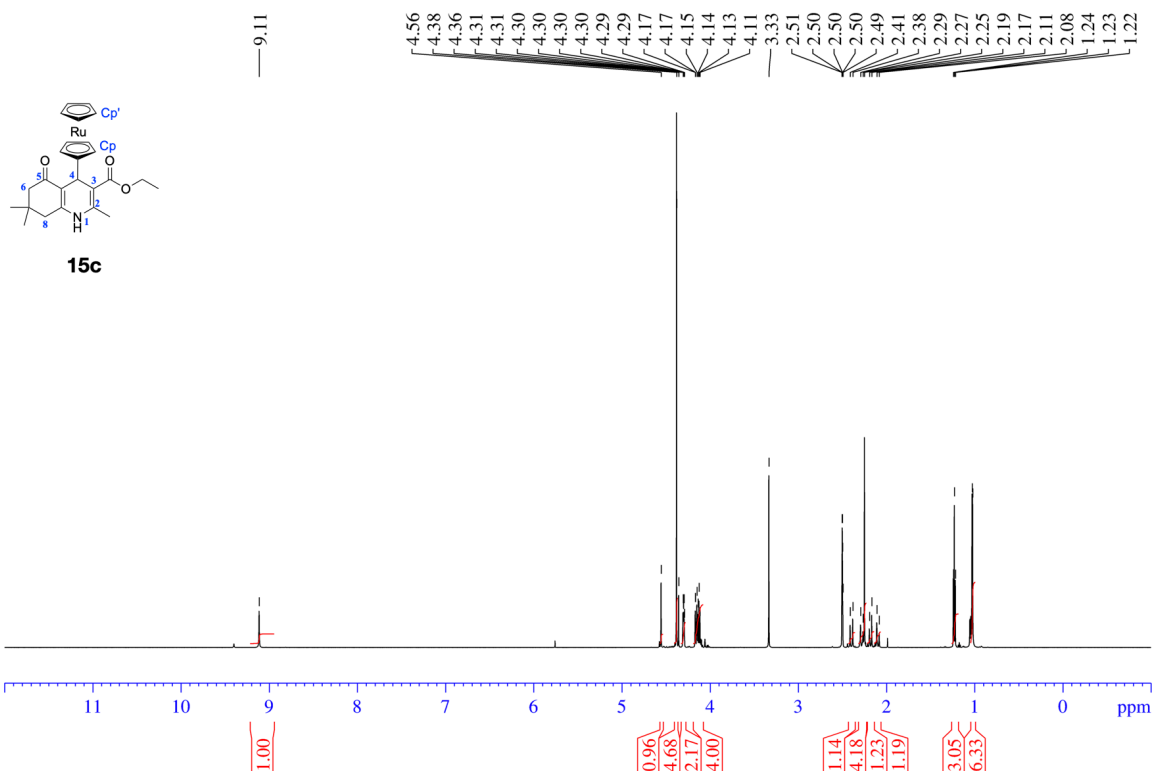

**Figure S52.** <sup>13</sup>C{<sup>1</sup>H} NMR spectrum of **15c** in DMSO-d<sub>6</sub>

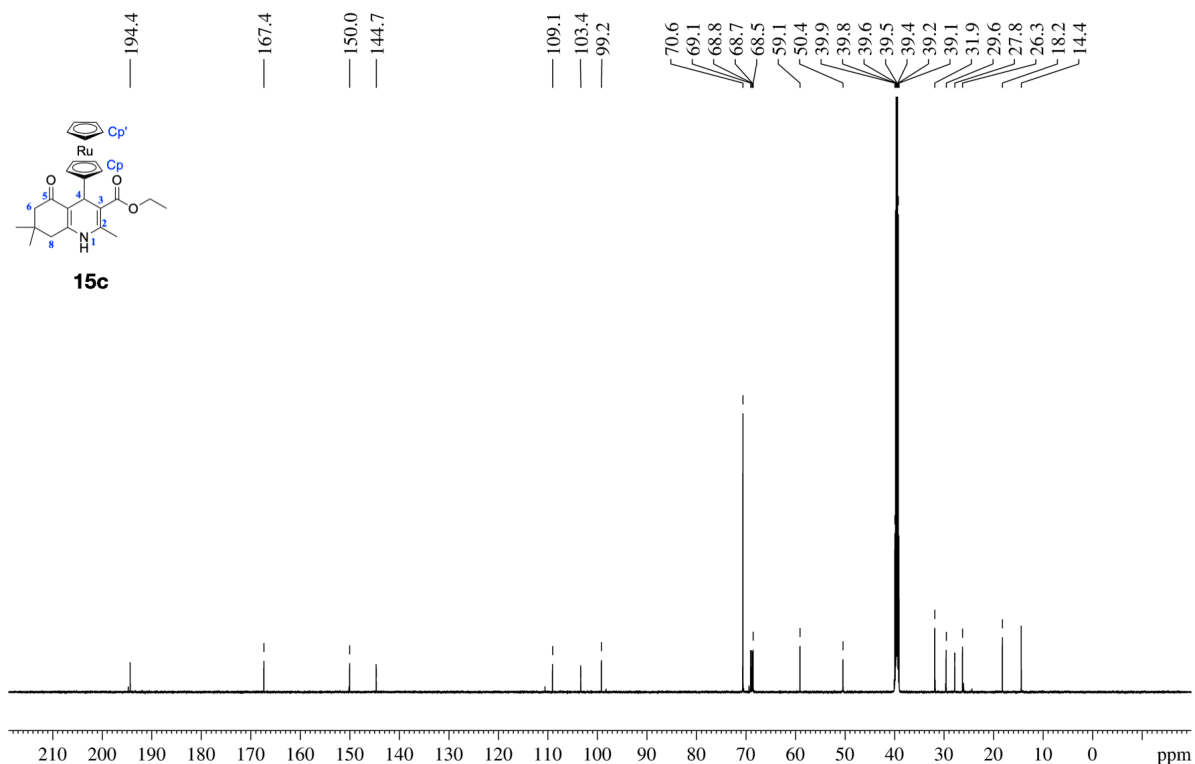

Figure S53.  $^{13}\text{C}\{^1\text{H}\}$  NMR spectrum of **15c** in  $\text{DMSO-d}_6$

Sample Information  
 Sample Type : Unknown  
 Sample Name : DPX-90032  
 Sample ID : DPX-90032  
 Vial# : 39  
 Injection Volume : 0.3

Method  
 <<LC Time Program>>  
 Time Module Command  
 4.00 Pumps B.Conc  
 7.00 Pumps B.Conc  
 7.05 Pumps B.Conc  
 13.00 Controller Stop

<<Column Information>>  
 Column Name : XB-C18  
 Column Length : 50 mm  
 Inner Diameter : 2.1 mm

<<Mobile Phase Name>>  
 Mobile Phase A : water+0.01%HOAc  
 Mobile Phase B : Methanol+0.01%HOAc

<<Data Acquisition>>  
 LC Stop Time : 13.00 min

<<Pump>>  
 Total Flow : 0.3000 mL/min

Peak Table

| Peak# | Ret. Time | Area%   |
|-------|-----------|---------|
| 1     | 6.211     | 9.644   |
| 2     | 6.356     | 90.356  |
| Total |           | 100.000 |

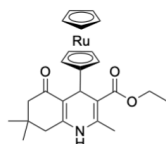

Chemical Formula:  $\text{C}_{25}\text{H}_{29}\text{NO}_3\text{Ru}$   
 Exact Mass: 493.1

**15c**

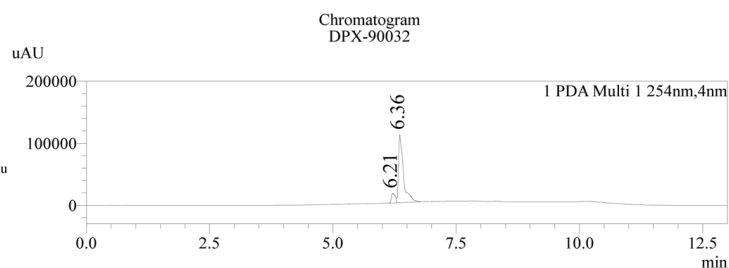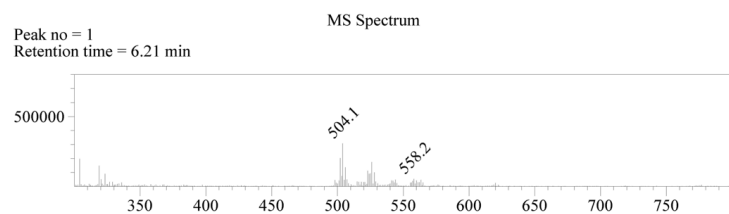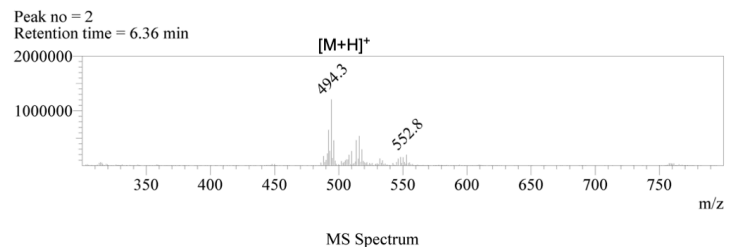

Figure S54.  $^{13}\text{C}\{^1\text{H}\}$  NMR spectrum of **15c** in  $\text{DMSO-d}_6$

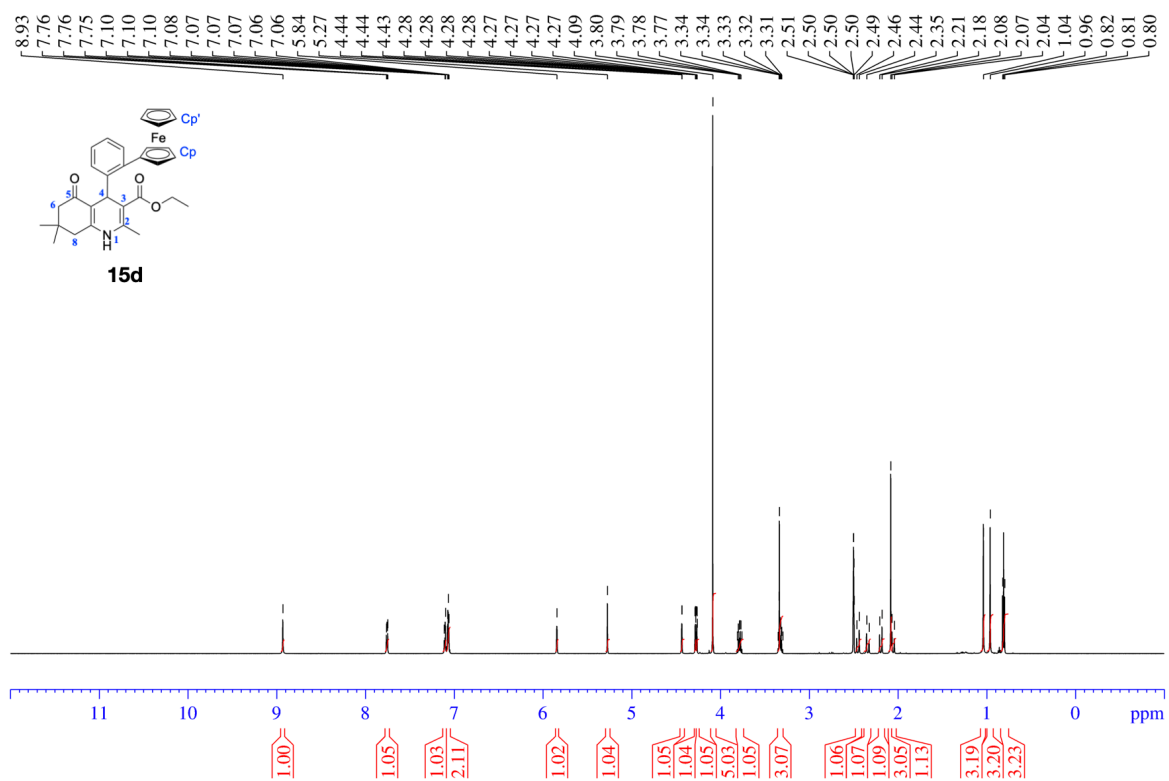

**Figure S55.**  $^{13}\text{C}\{^1\text{H}\}$  NMR spectrum of **15d** in  $\text{DMSO}-d_6$

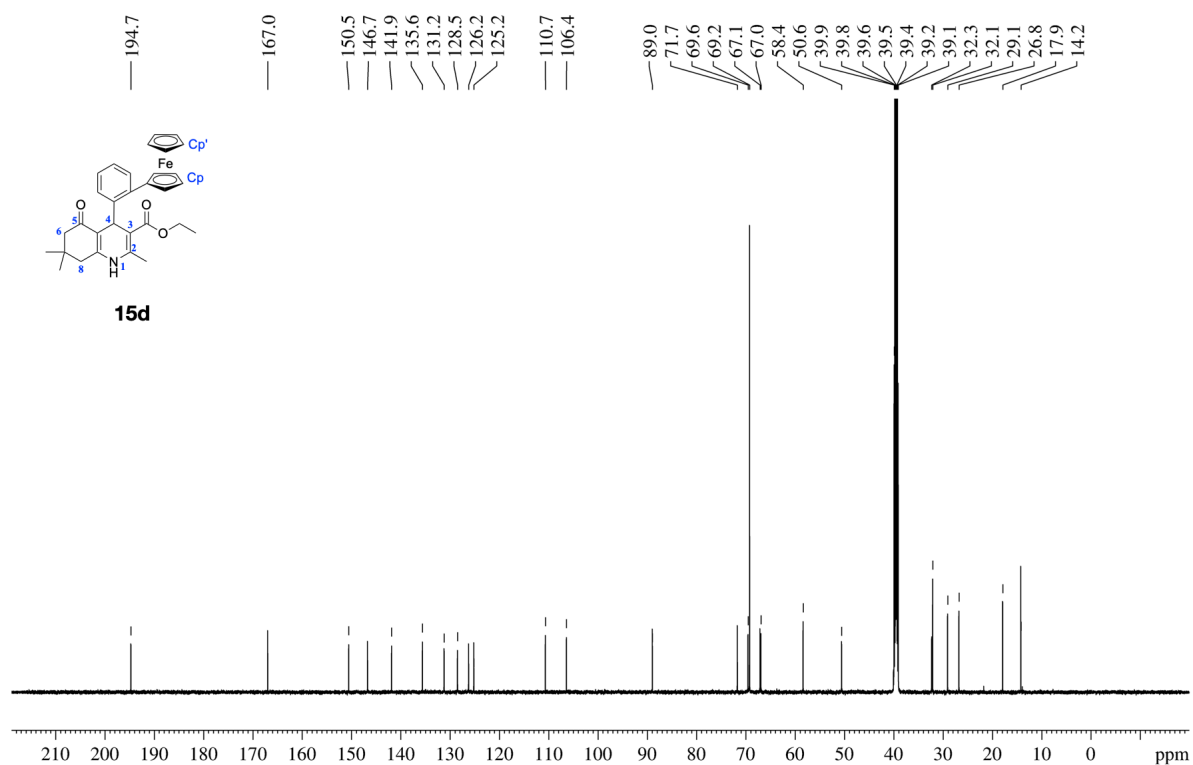

**Figure S56.**  $^{13}\text{C}\{^1\text{H}\}$  NMR spectrum of **15d** in  $\text{DMSO}-d_6$

Sample Information  
 Sample Type : Unknown  
 Sample Name : KGK-00528  
 Sample ID : KGK-00528  
 Vial# : 36  
 Injection Volume : 0.3

Method  
 <<LC Time Program>>  
 Time : 4.00  
 Module : Pumps  
 7.00 : Pumps  
 7.05 : Pumps  
 13.00 : Controller  
 Command : B.Conc  
 B.Conc  
 B.Conc  
 Stop

<<Column Information>>  
 Column Name : XB-C18  
 Column Length : 50 mm  
 Inner Diameter : 2.1 mm

<<Mobile Phase Name>>  
 Mobile Phase A : water+0.01%HCOOH  
 Mobile Phase B : Methanol+0.01%HCOOH

<<Data Acquisition>>  
 LC Stop Time : 13.00 min

<<Pump>>  
 Total Flow : 0.3000 mL/min

Peak Table  
 PDA Ch1 254nm

| Peak# | Ret. Time | Area%   |
|-------|-----------|---------|
| 1     | 7.072     | 11.794  |
| 2     | 7.340     | 88.206  |
| Total |           | 100.000 |

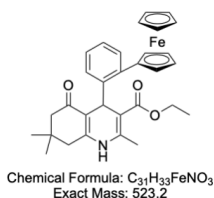

**15d**

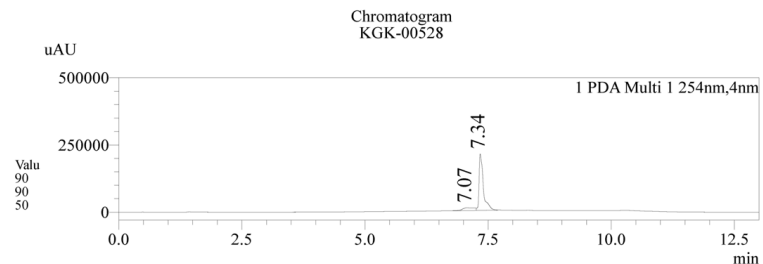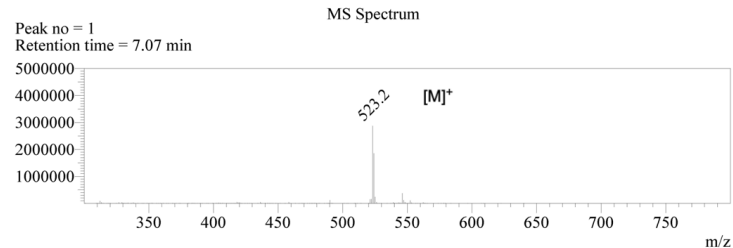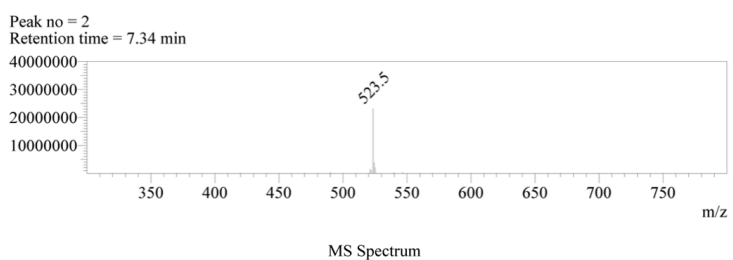

**Figure S57.**  $^{13}C\{^1H\}$  NMR spectrum of **15d** in  $DMSO-d_6$

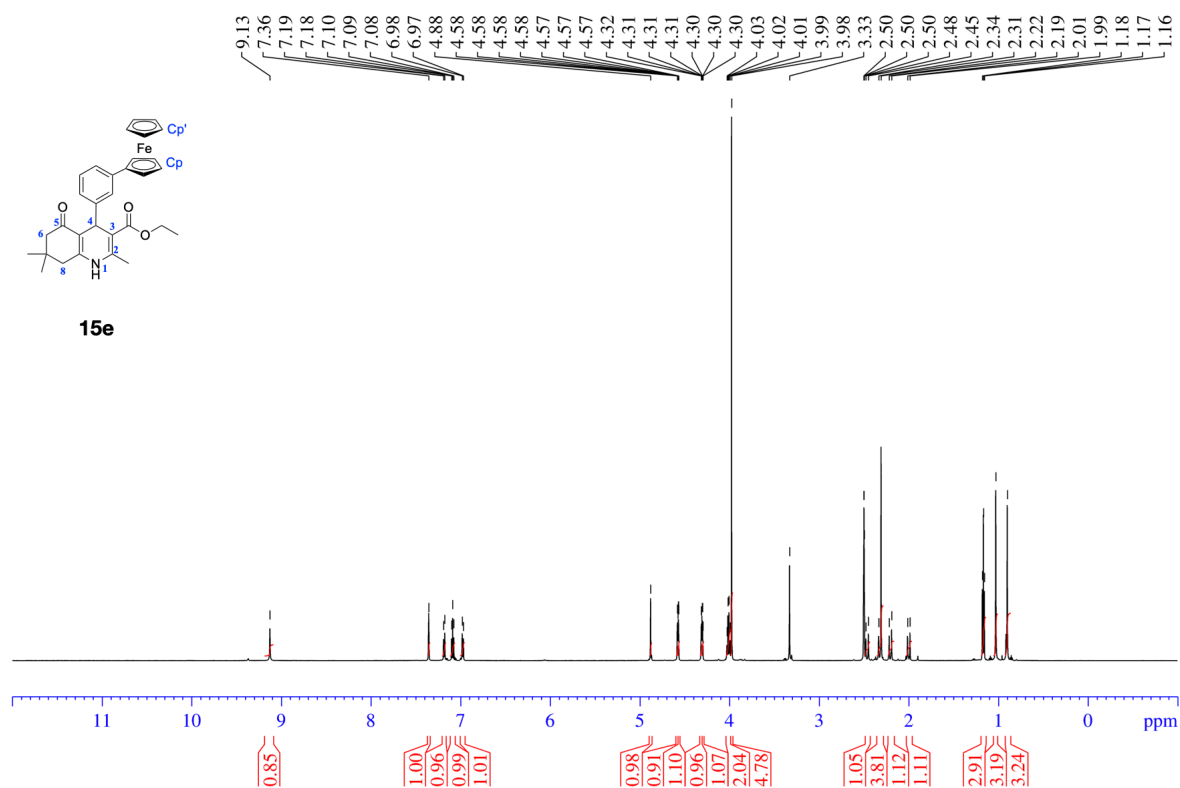

**Figure S58.**  $^{13}C\{^1H\}$  NMR spectrum of **15e** in  $DMSO-d_6$

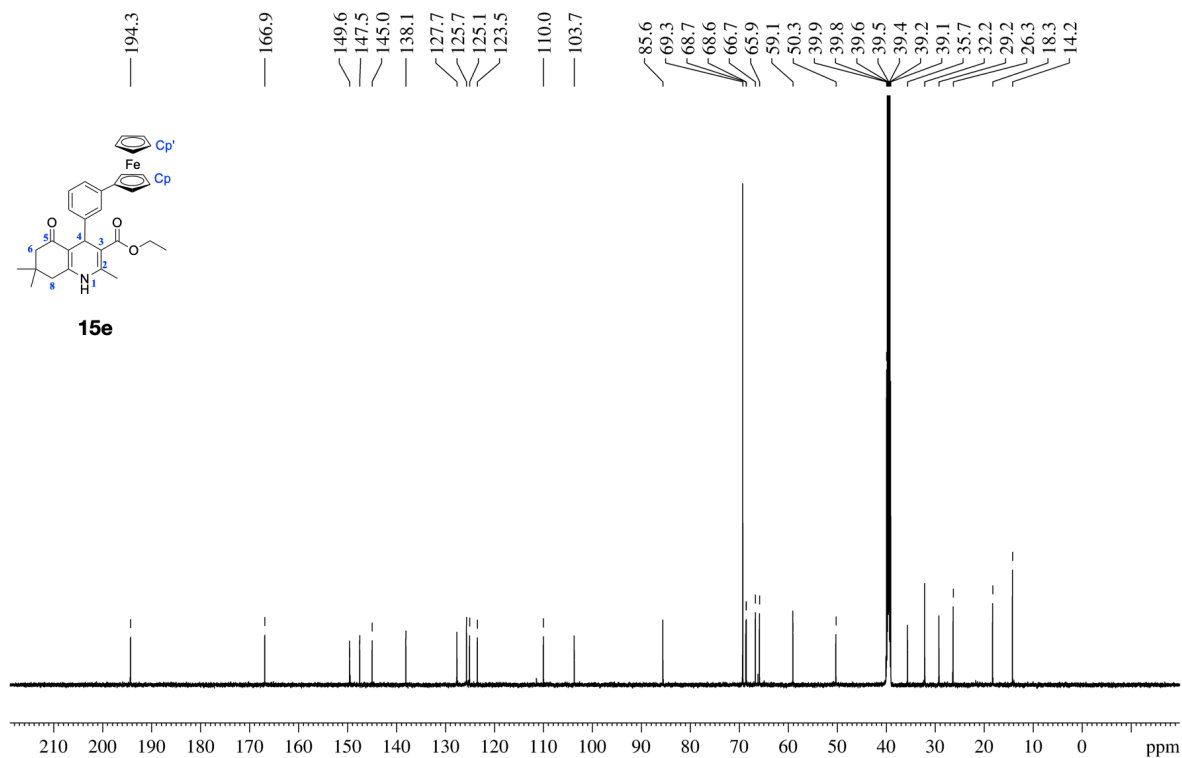

Figure S59.  $^{13}\text{C}\{^1\text{H}\}$  NMR spectrum of **15e** in  $\text{DMSO-d}_6$

Sample Information  
 Sample Type : Unknown  
 Sample Name : DPX-90007  
 Sample ID : DPX-90007  
 Vial# : 45  
 Injection Volume : 0.3

Method  
 Time : 4.00  
 Module : Pumps  
 Pumps : B.Conc  
 7.00 : Pumps  
 B.Conc  
 7.05 : Pumps  
 B.Conc  
 13.00 : Controller  
 Stop

<<Column Information>>  
 Column Name : XB-C18  
 Column Length : 50 mm  
 Inner Diameter : 2.1 mm

<<Mobile Phase Name>>  
 Mobile Phase A : water+0.01% $\text{HCOOH}$   
 Mobile Phase B : Methanol+0.01% $\text{HCOOH}$

<<Data Acquisition>>  
 LC Stop Time : 13.00 min

<<Pump>>  
 Total Flow : 0.3000 mL/min

PDA Ch1 254nm

| Peak# | Ret. Time | Area%   |
|-------|-----------|---------|
| 1     | 6.968     | 13.836  |
| 2     | 7.219     | 86.164  |
| Total |           | 100.000 |

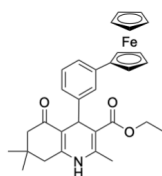

Chemical Formula:  $\text{C}_{31}\text{H}_{33}\text{FeNO}_3$   
 Exact Mass: 523.2

**15e**

Figure S60.  $^{13}\text{C}\{^1\text{H}\}$  NMR spectrum of **15e** in  $\text{DMSO-d}_6$

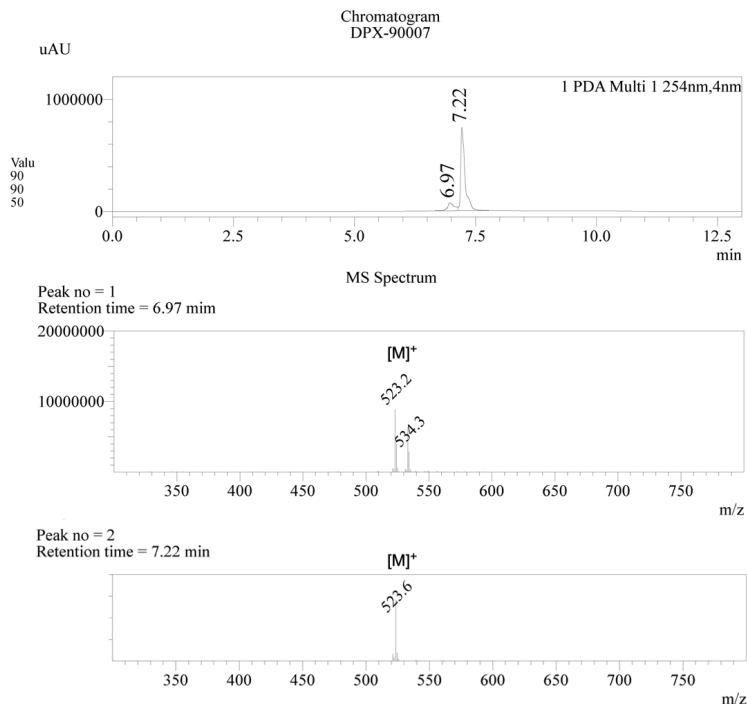

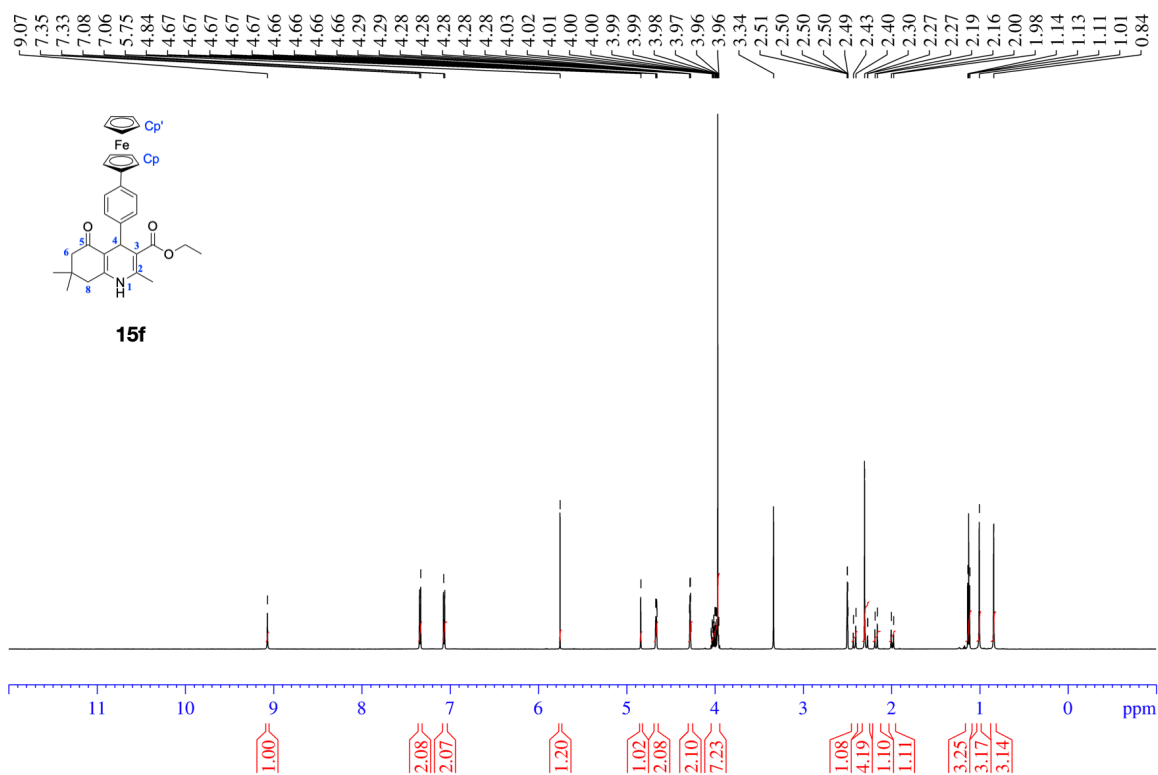

**Figure S61.**  $^{13}\text{C}\{^1\text{H}\}$  NMR spectrum of **15f** in  $\text{DMSO-d}_6$

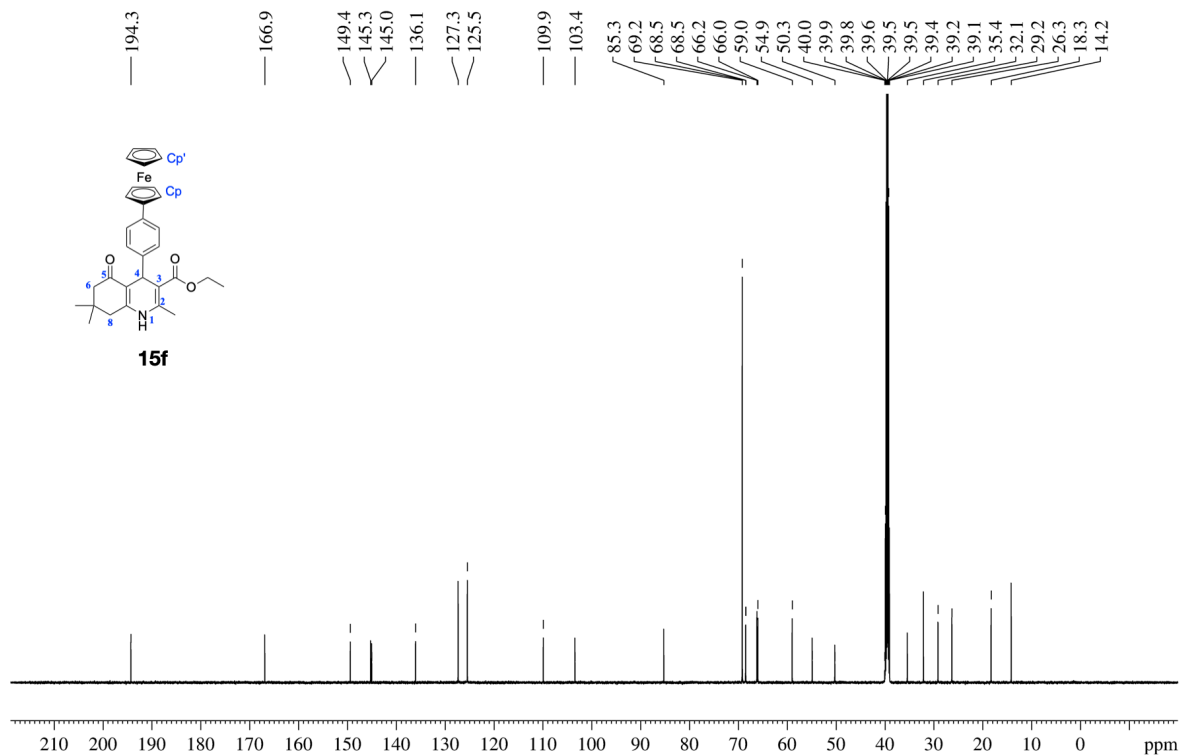

**Figure S62.**  $^{13}\text{C}\{^1\text{H}\}$  NMR spectrum of **15f** in  $\text{DMSO-d}_6$



Sample Information  
 Sample Type : Unknown  
 Sample Name : kgk-00527\_MeOH\_5-9-5  
 Sample ID : kgk-00527\_MeOH\_5-9-5  
 Vial# : 97  
 Injection Volume : 0.5

Method  
 <<LC Time Program>>  
 Time Module Command Valu  
 4.00 Pumps B.Conc 90  
 7.00 Pumps B.Conc 90  
 7.05 Pumps B.Conc 50  
 13.00 Controller Stop

<<Mobile Phase Name>>  
 Mobile Phase A : water+0.01%HCOOH  
 Mobile Phase B : Methanol+0.01%HCOOH

<<Data Acquisition>>  
 LC Stop Time : 13.00 min

<<Pump>>  
 Total Flow : 0.3000 mL/min

Peak Table

| Peak# | Ret. Time | Area%   |
|-------|-----------|---------|
| 1     | 8.002     | 4.595   |
| 2     | 8.205     | 95.405  |
| Total |           | 100.000 |

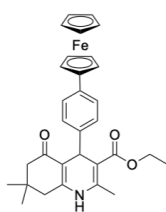

Chemical Formula: C<sub>31</sub>H<sub>33</sub>FeNO<sub>3</sub>  
 Exact Mass: 523,2

15f

Figure S63. <sup>13</sup>C{<sup>1</sup>H} NMR spectrum of 15f in DMSO-d<sub>6</sub>

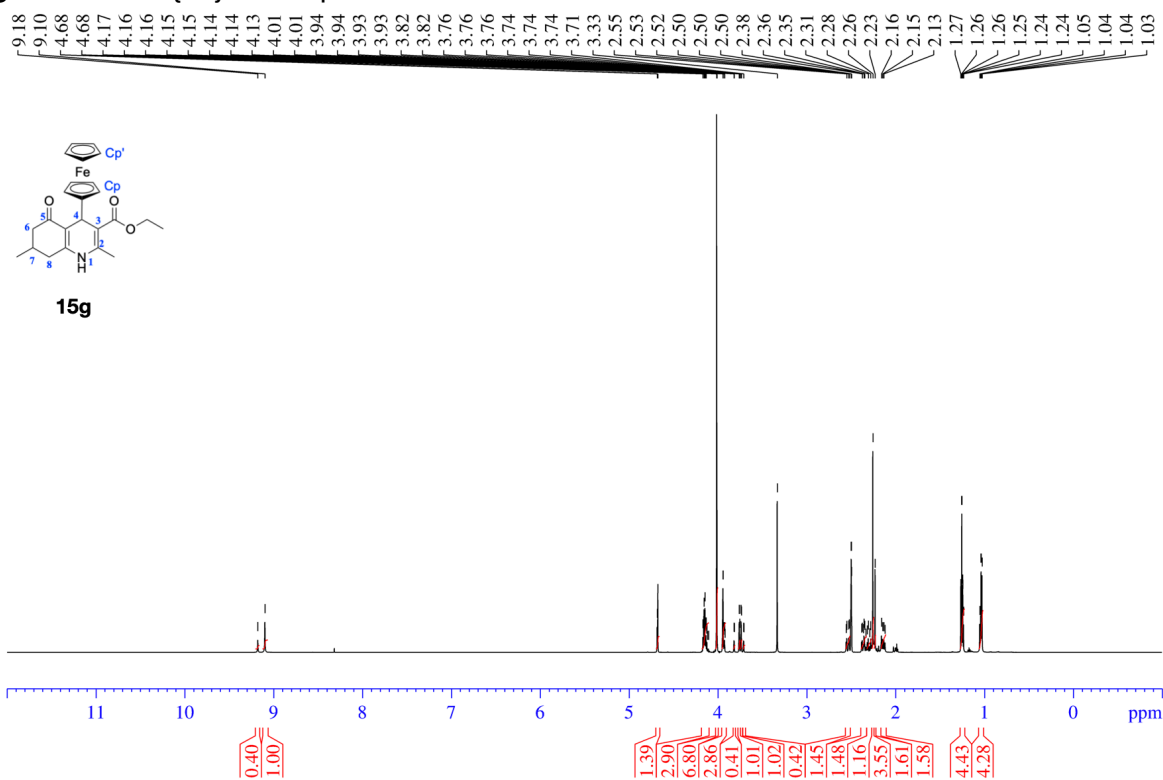

Figure S64. <sup>13</sup>C{<sup>1</sup>H} NMR spectrum of 15g in DMSO-d<sub>6</sub>

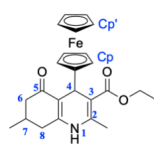

15g

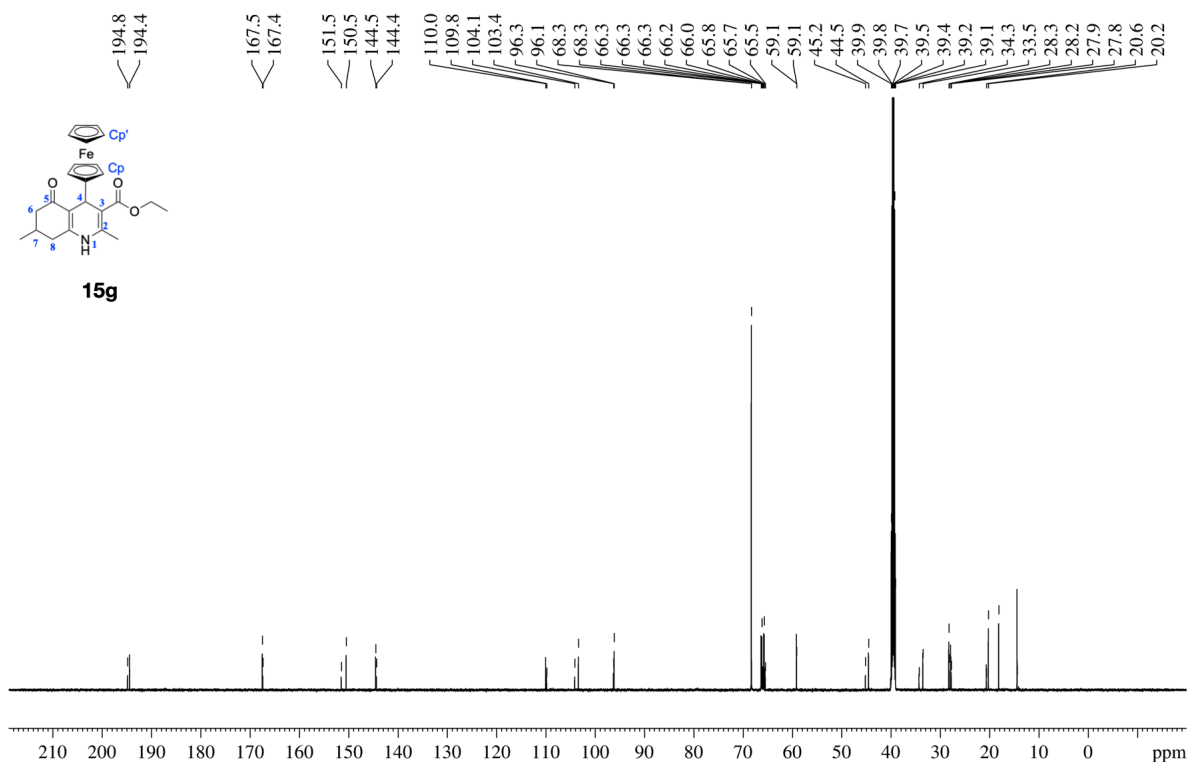

Figure S65.  $^{13}\text{C}\{^1\text{H}\}$  NMR spectrum of **15g** in  $\text{DMSO-d}_6$

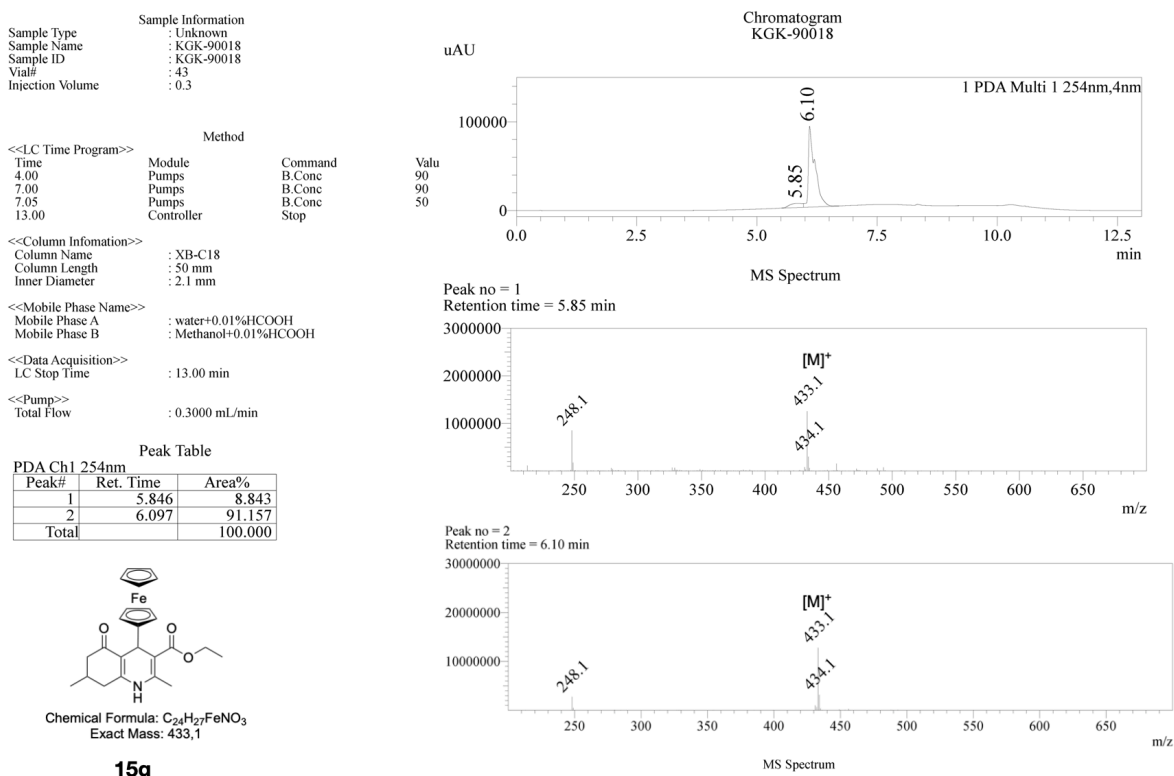

Figure S66.  $^{13}\text{C}\{^1\text{H}\}$  NMR spectrum of **15g** in  $\text{DMSO-d}_6$

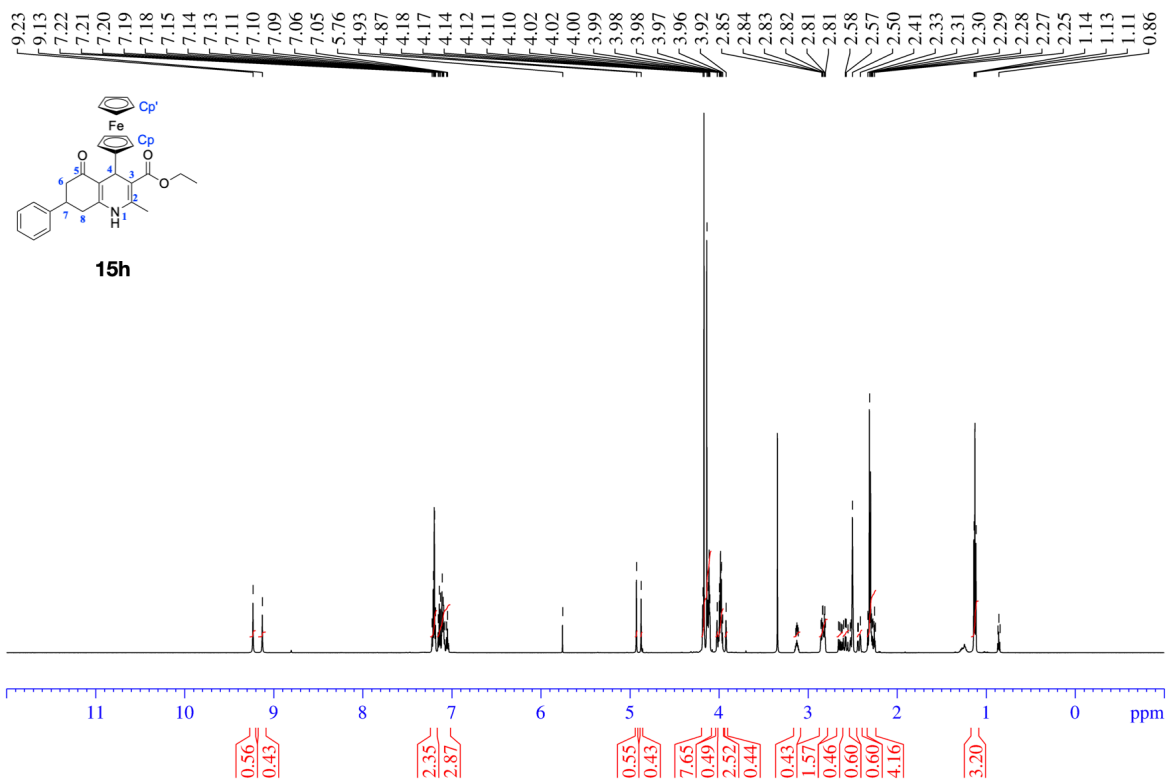

**Figure S67.**  $^{13}\text{C}\{^1\text{H}\}$  NMR spectrum of **15h** in  $\text{DMSO-d}_6$

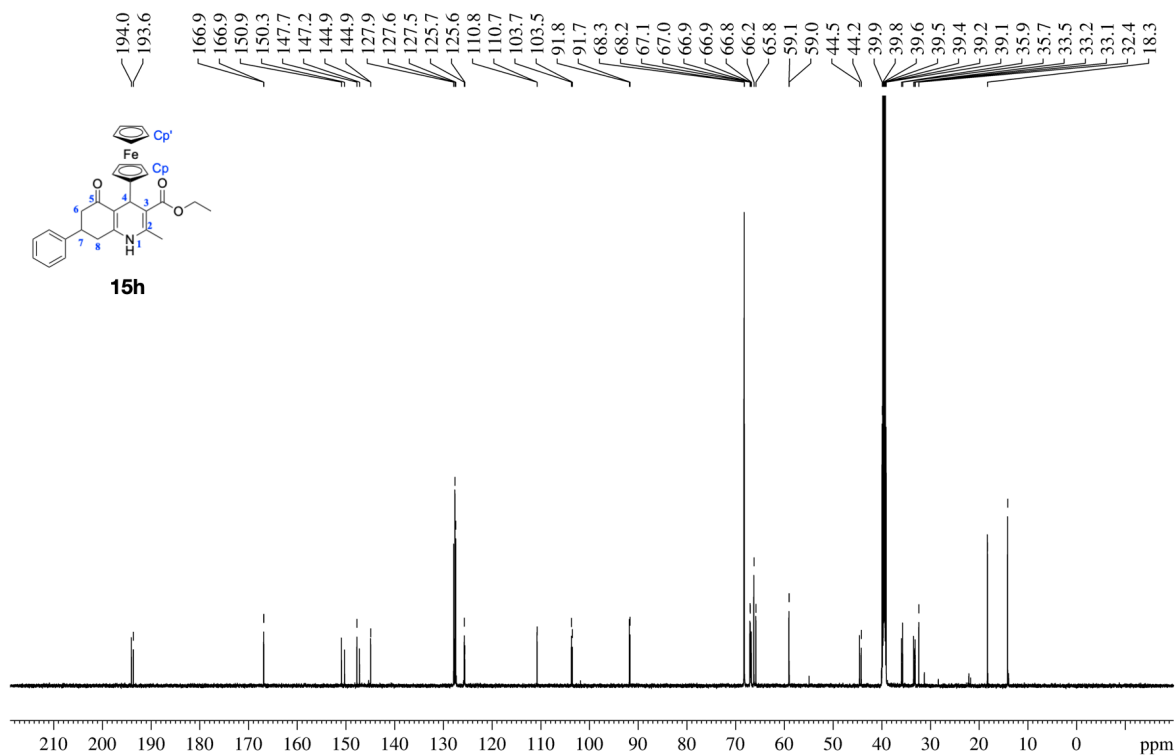

**Figure S68.**  $^{13}\text{C}\{^1\text{H}\}$  NMR spectrum of **15h** in  $\text{DMSO-d}_6$

Sample Information  
 Sample Type : Unknown  
 Sample Name : KGK-90013  
 Sample ID : KGK-90013  
 Vial#: 38  
 Injection Volume : 0.3

Method  
 Module : Pumps  
 Command : B.Conc  
 Pumps : B.Conc  
 Controller : B.Conc  
 Stop

<<LC Time Program>>  
 Time : 4.00  
 7.00  
 7.05  
 13.00

<<Column Information>>  
 Column Name : XB-C18  
 Column Length : 50 mm  
 Inner Diameter : 2.1 mm

<<Mobile Phase Name>>  
 Mobile Phase A : water+0.01%HCOOH  
 Mobile Phase B : Methanol+0.01%HCOOH

<<Data Acquisition>>  
 LC Stop Time : 13.00 min

<<Pump>>  
 Total Flow : 0.3000 mL/min

Peak Table

| Peak# | Ret. Time | Area%   |
|-------|-----------|---------|
| 1     | 5.752     | 1.483   |
| 2     | 6.786     | 49.413  |
| 3     | 6.942     | 49.104  |
| Total |           | 100.000 |

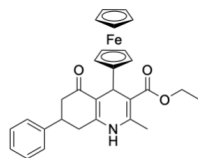

Chemical Formula: C<sub>29</sub>H<sub>29</sub>FeNO<sub>3</sub>  
 Exact Mass: 495.1

15h

Figure S69. <sup>13</sup>C{<sup>1</sup>H} NMR spectrum of 15h in DMSO-d<sub>6</sub>

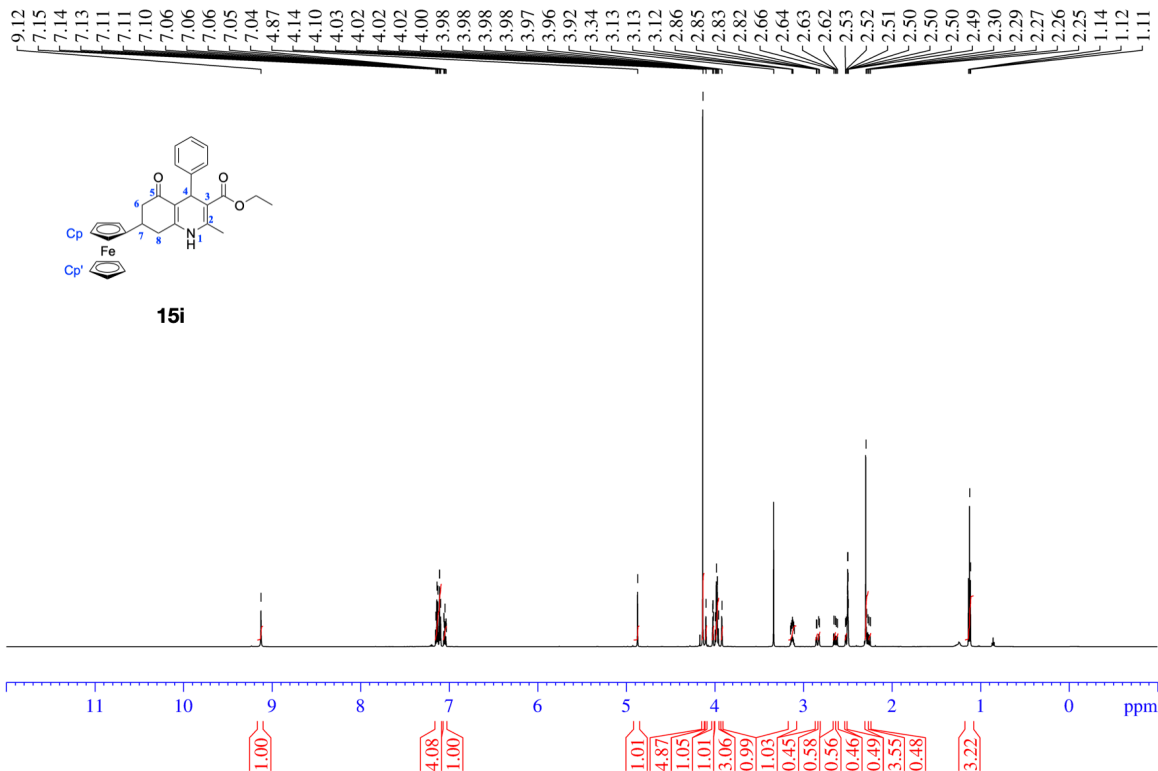

Figure S70. <sup>13</sup>C{<sup>1</sup>H} NMR spectrum of 15i in DMSO-d<sub>6</sub>

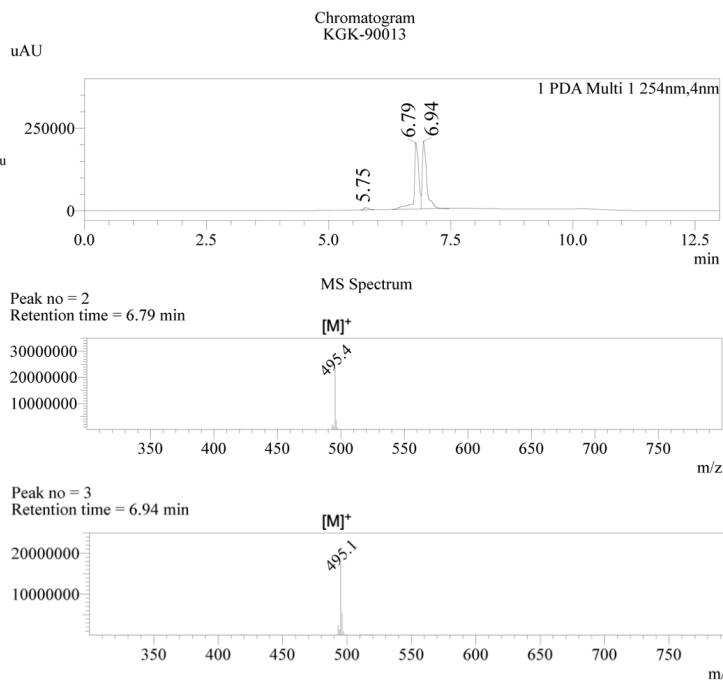

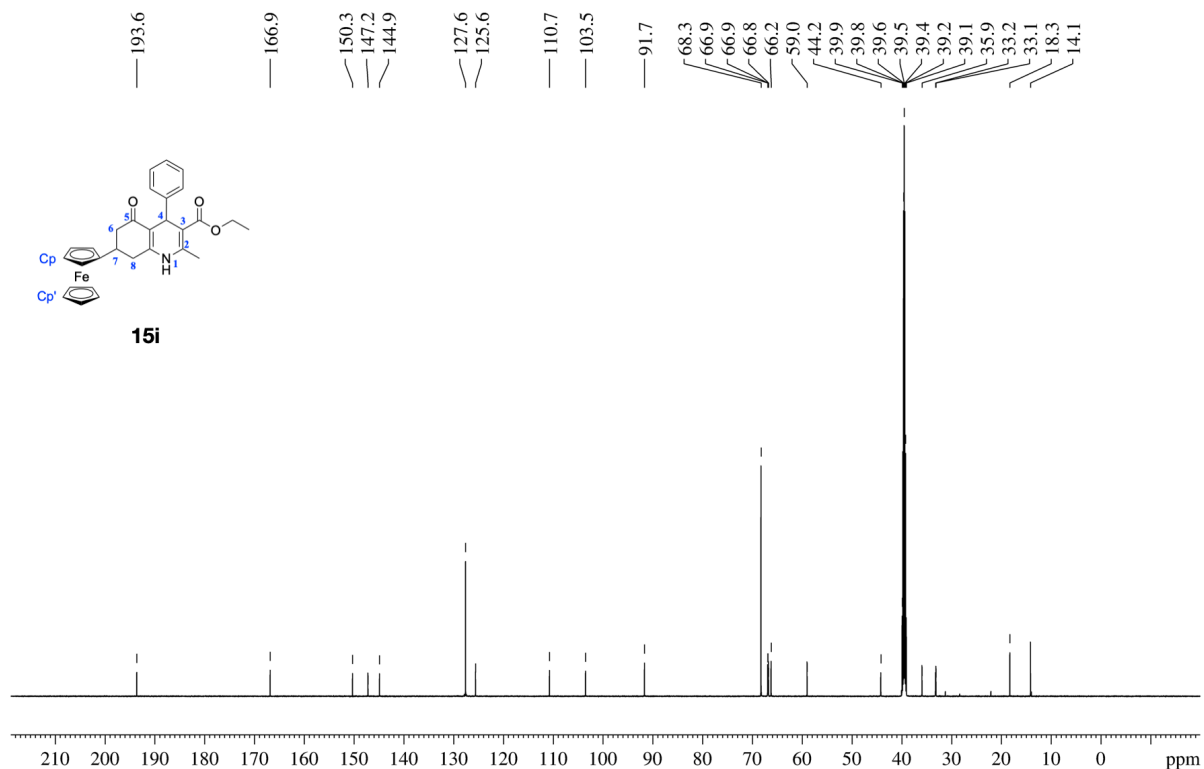

Figure S71.  $^{13}\text{C}\{^1\text{H}\}$  NMR spectrum of **15i** in  $\text{DMSO}-d_6$

Sample Information  
 Sample Type : Unknown  
 Sample Name : kgk-00545\_MeOH\_5-9-5  
 Sample ID : kgk-00545\_MeOH\_5-9-5  
 Vial# : 101  
 Injection Volume : 0.5

Method  
 Module Command  
 Pumps B.Conc  
 Pumps B.Conc  
 Pumps B.Conc  
 Controller Stop

<<LC Time Program>>  
 Time 4.00  
 7.00  
 7.05  
 13.00

<<Mobile Phase Name>>  
 Mobile Phase A : water+0.01% $\text{HCOOH}$   
 Mobile Phase B : Methanol+0.01% $\text{HCOOH}$

<<Data Acquisition>>  
 LC Stop Time : 13.00 min

<<Pump>>  
 Total Flow : 0.3000 mL/min

| Peak Table |           |         |
|------------|-----------|---------|
| Peak#      | Ret. Time | Area%   |
| 1          | 7.770     | 100.000 |
| Total      |           | 100.000 |

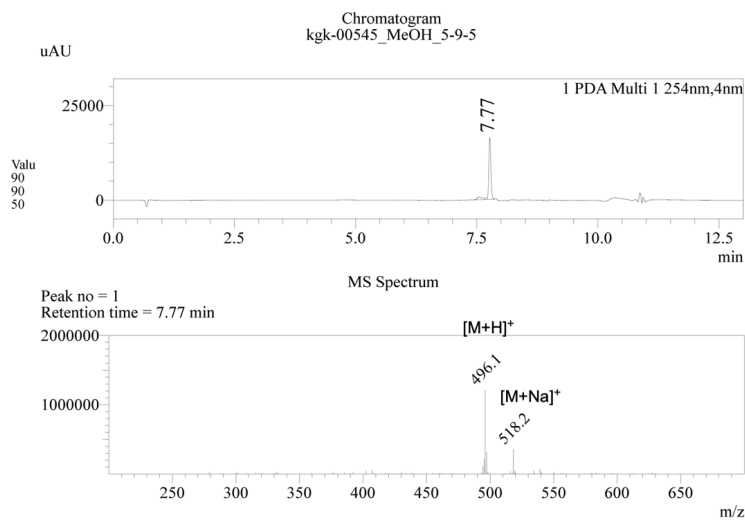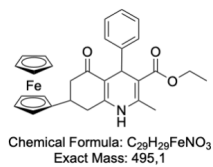

**15i**

Figure S72.  $^{13}\text{C}\{^1\text{H}\}$  NMR spectrum of **15i** in  $\text{DMSO}-d_6$

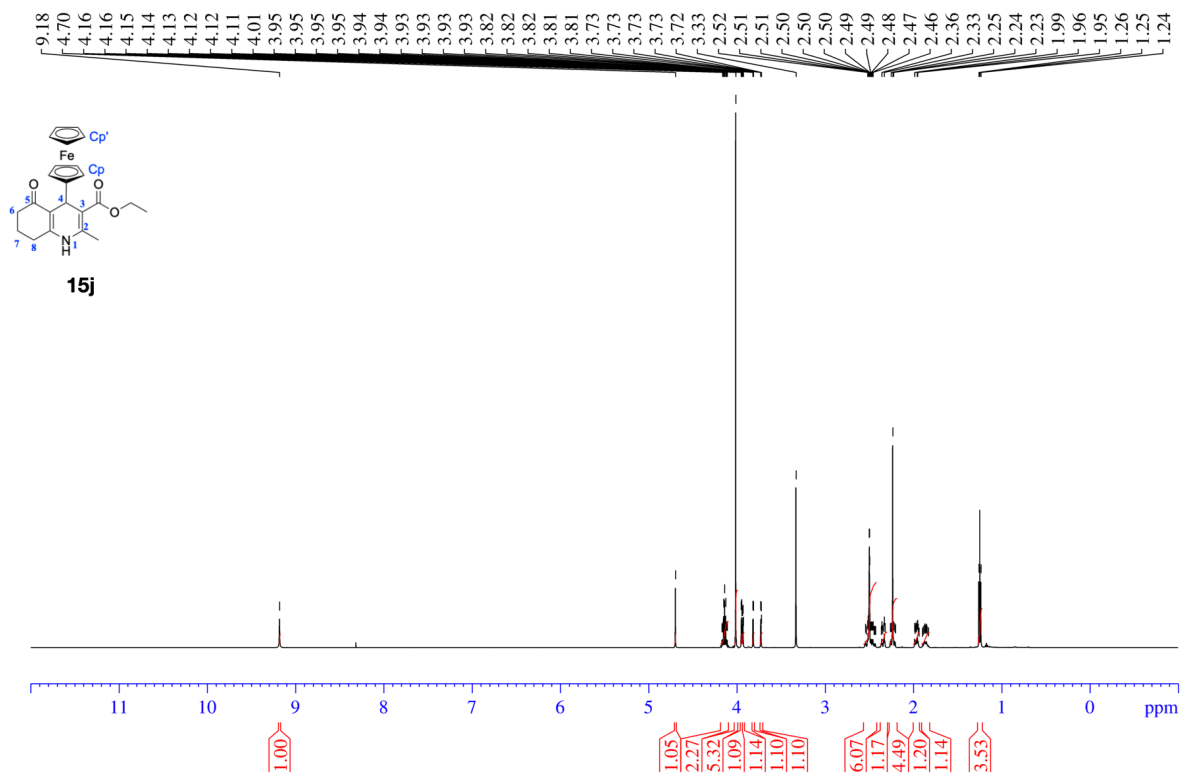

**Figure S73.**  $^{13}\text{C}\{^1\text{H}\}$  NMR spectrum of **15i** in  $\text{DMSO-d}_6$

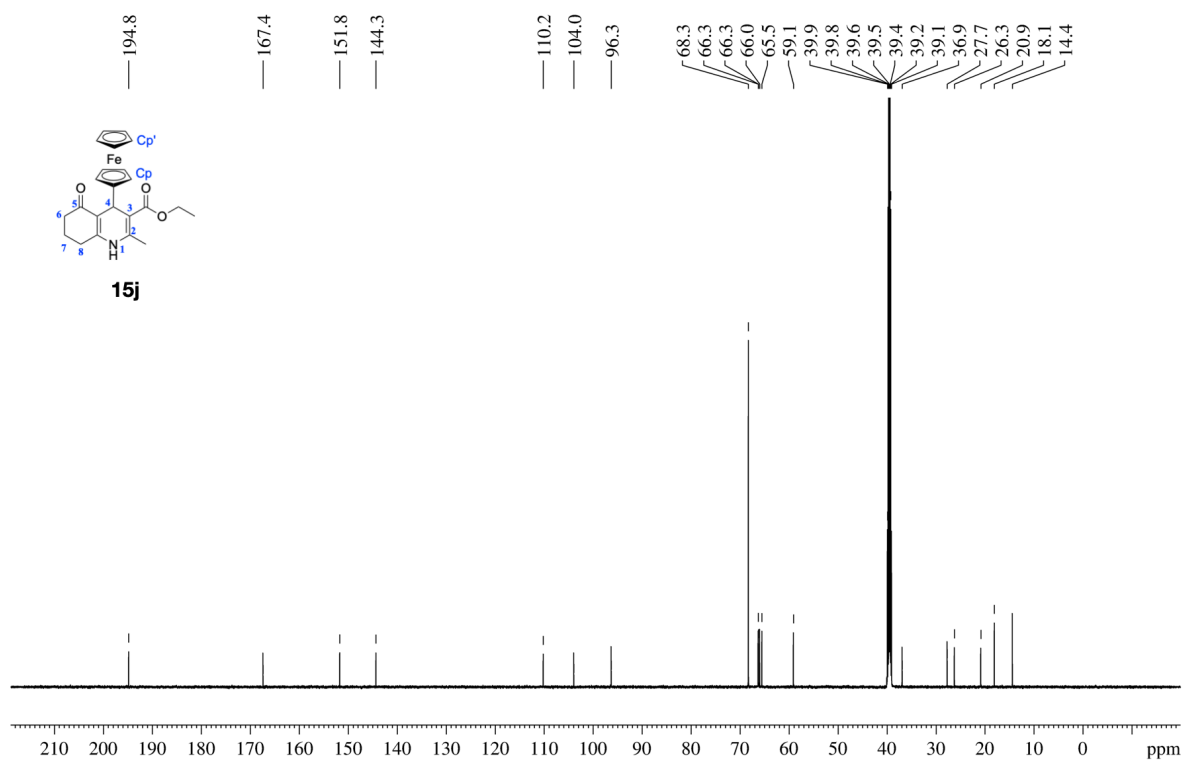

**Figure S74.**  $^{13}\text{C}\{^1\text{H}\}$  NMR spectrum of **15j** in  $\text{DMSO-d}_6$

Sample Information  
 Sample Type : Unknown  
 Sample Name : KKG-90005  
 Sample ID : KKG-90005  
 Vial# : 71  
 Injection Volume : 2

Method  
 <<LC Time Program>>  
 Time Module Command  
 4.00 Pumps B.Conc 90  
 7.00 Pumps B.Conc 90  
 7.00 Pumps B.Conc 90  
 13.00 Controller Stop

<<Mobile Phase Name>>  
 Mobile Phase A : water+0.01%*HCOOH*  
 Mobile Phase B : Methanol+0.01%*HCOOH*

<<Data Acquisition>>  
 LC Stop Time : 13.00 min

<<Pump>>  
 Total Flow : 0.3000 mL/min

Peak Table

| Peak# | Ret. Time | Area%   |
|-------|-----------|---------|
| 1     | 7.032     | 11.735  |
| 2     | 7.369     | 88.265  |
| Total |           | 100.000 |

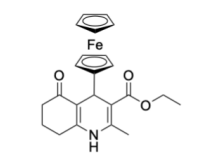

15j

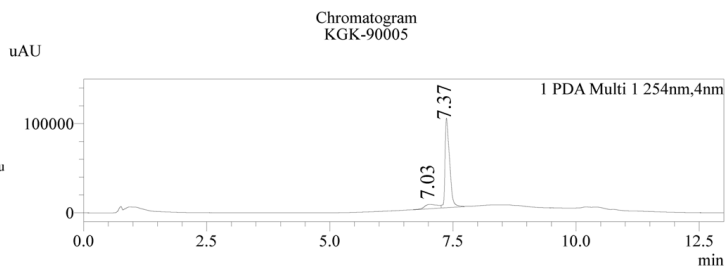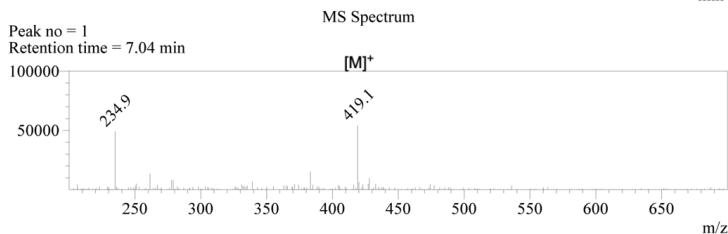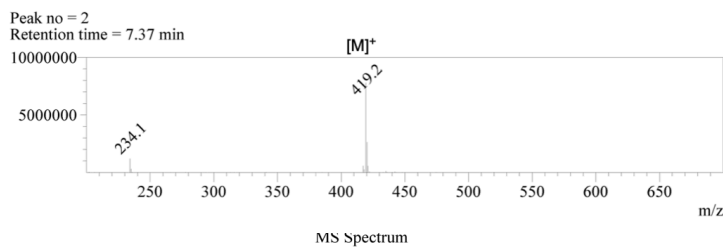

Figure S75.  $^{13}C\{^1H\}$  NMR spectrum of 15j in  $DMSO-d_6$

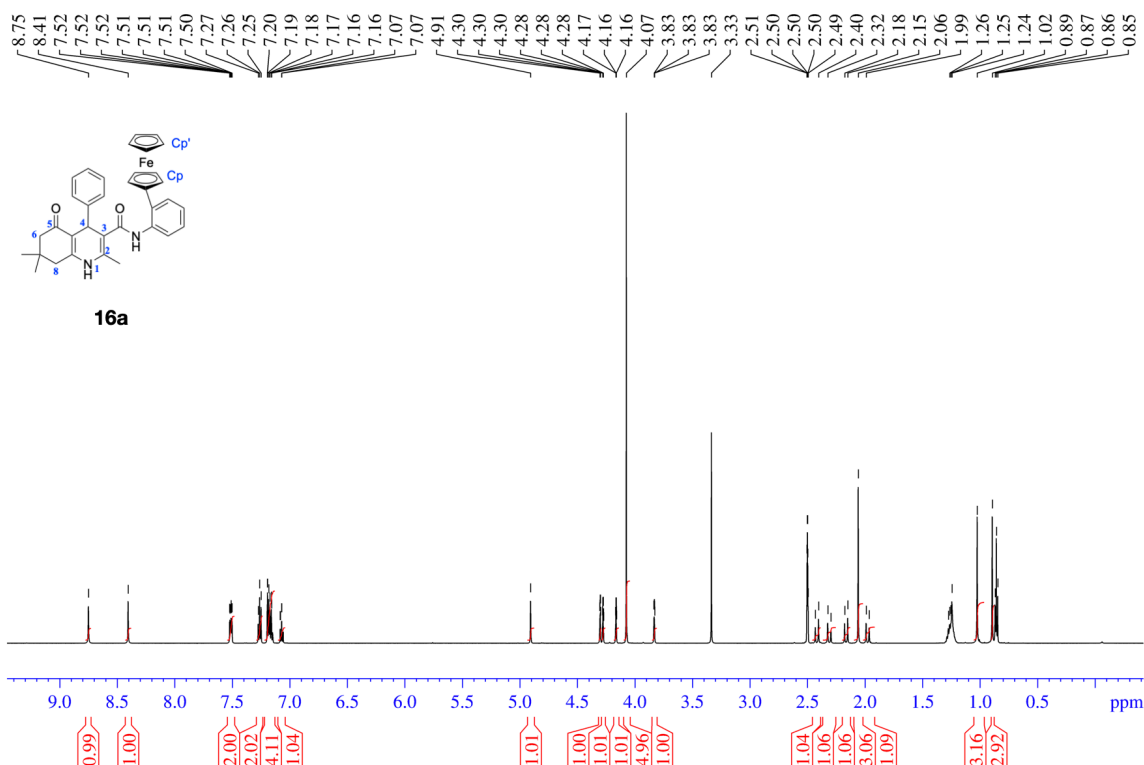

Figure S76.  $^{13}C\{^1H\}$  NMR spectrum of 16a in  $DMSO-d_6$

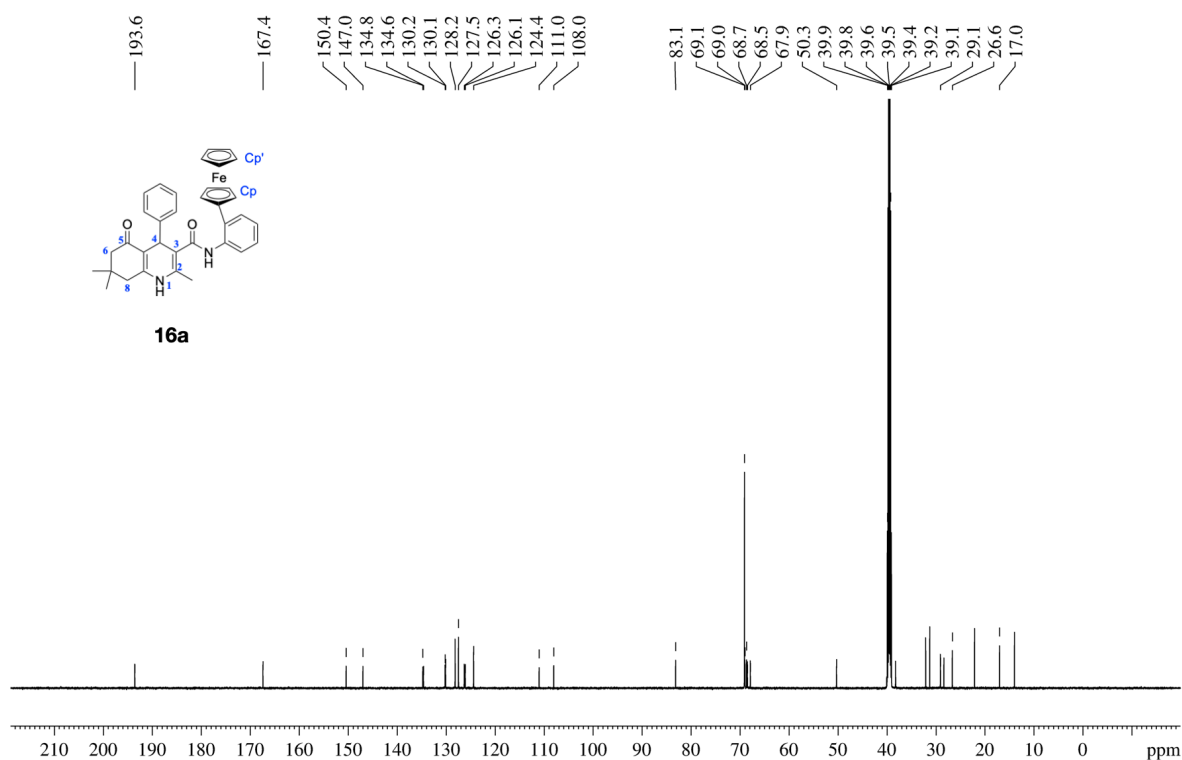

**Figure S77.**  $^{13}\text{C}\{^1\text{H}\}$  NMR spectrum of **16a** in  $\text{DMSO-}d_6$

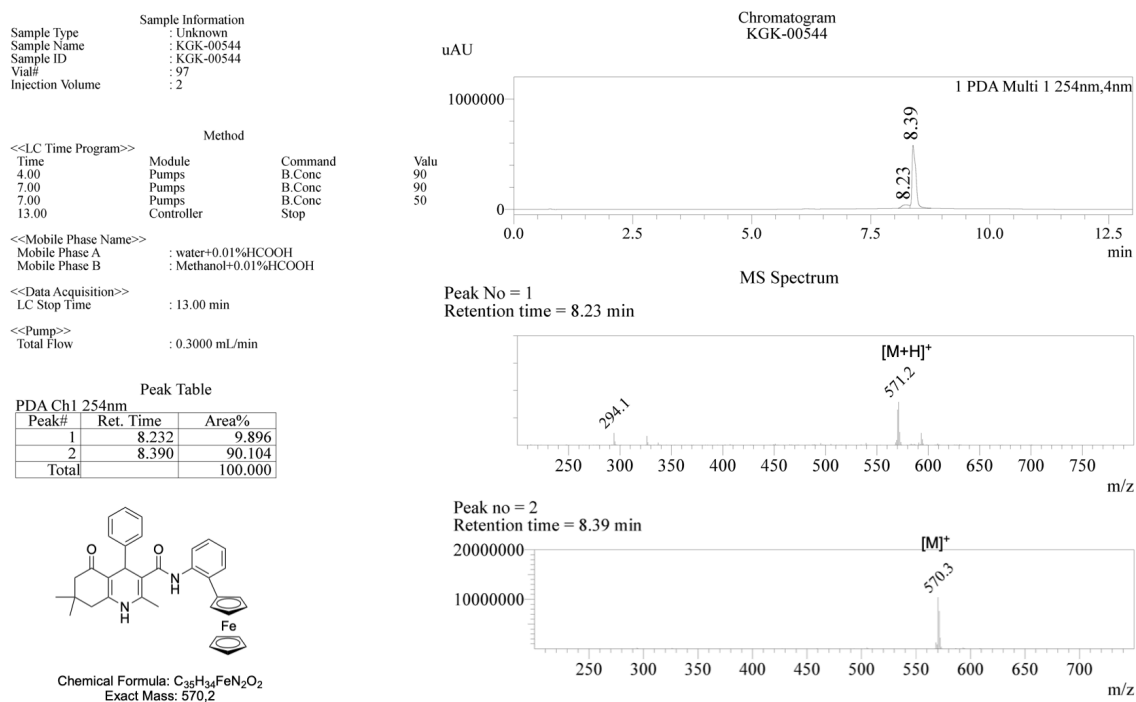

**Figure S78.**  $^{13}\text{C}\{^1\text{H}\}$  NMR spectrum of **16a** in  $\text{DMSO-}d_6$



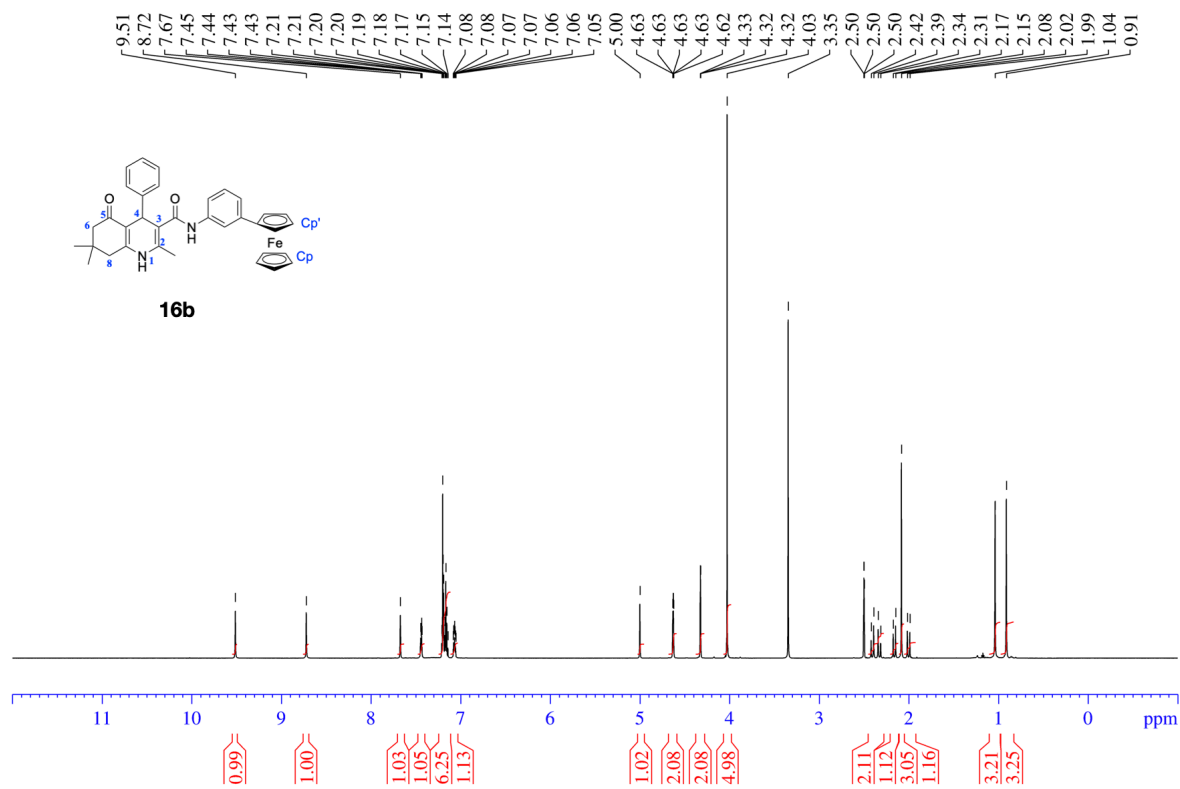

**Figure S79.**  $^{13}\text{C}\{^1\text{H}\}$  NMR spectrum of **16b** in  $\text{DMSO-d}_6$

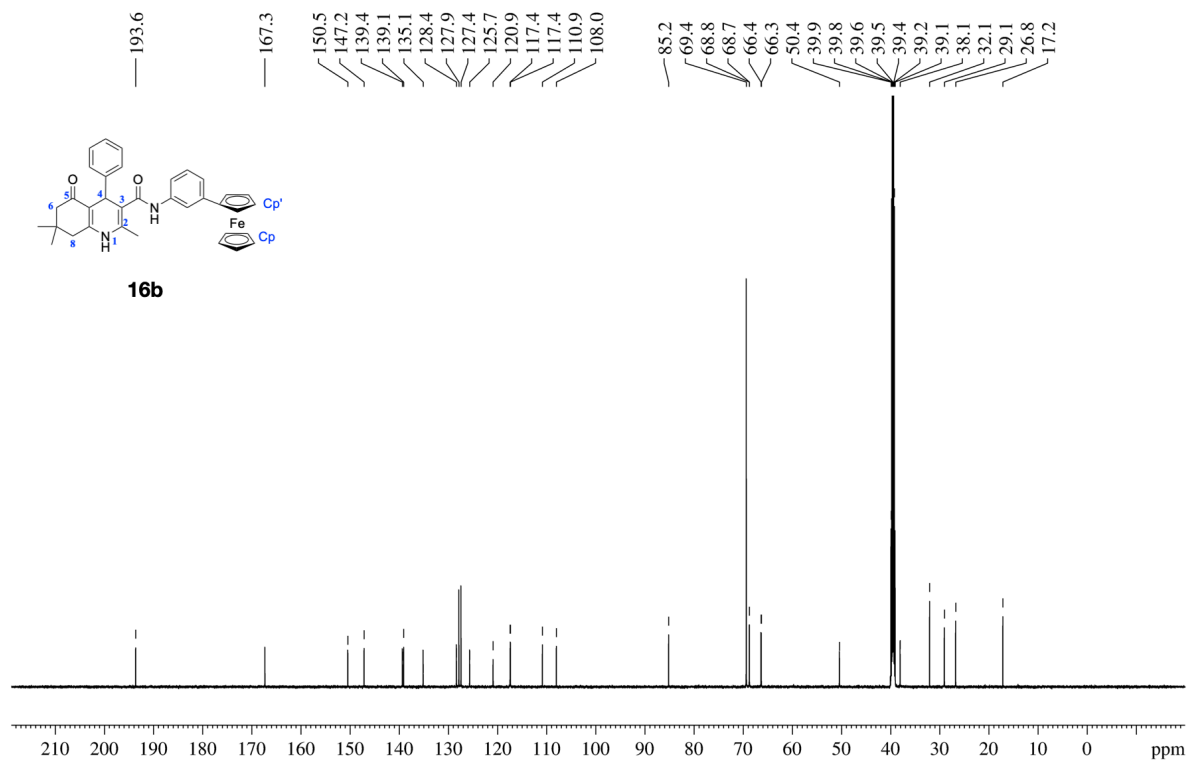

**Figure S80.**  $^{13}\text{C}\{^1\text{H}\}$  NMR spectrum of **16b** in  $\text{DMSO-d}_6$

Sample Information  
 Sample Type : Unknown  
 Sample Name : KGK-00540  
 Sample ID : KGK-00540  
 Vial# : 96  
 Injection Volume : 2

Method  
 <<LC Time Program>>  
 Time Module Command Valu  
 4.00 Pumps B.Conc 90  
 7.00 Pumps B.Conc 90  
 7.00 Pumps B.Conc 50  
 13.00 Controller Stop

<<Mobile Phase Name>>  
 Mobile Phase A : water+0.01%HCOOH  
 Mobile Phase B : Methanol+0.01%HCOOH

<<Data Acquisition>>  
 LC Stop Time : 13.00 min

<<Pump>>  
 Total Flow : 0.3000 mL/min

Peak Table

| Peak# | Ret. Time | Area%   |
|-------|-----------|---------|
| 1     | 8.319     | 10.734  |
| 2     | 8.481     | 89.266  |
| Total |           | 100.000 |

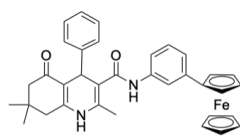

Chemical Formula: C<sub>35</sub>H<sub>34</sub>FeN<sub>2</sub>O<sub>2</sub>  
 Exact Mass: 570.2

16b

Chromatogram  
 KGK-00540

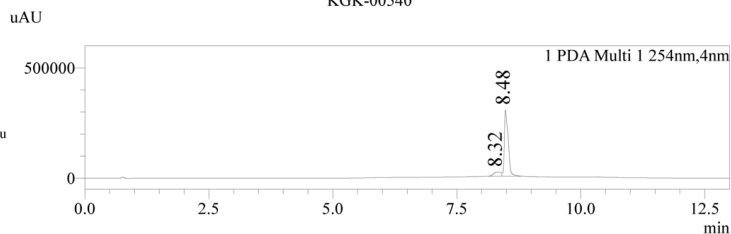

MS Spectrum

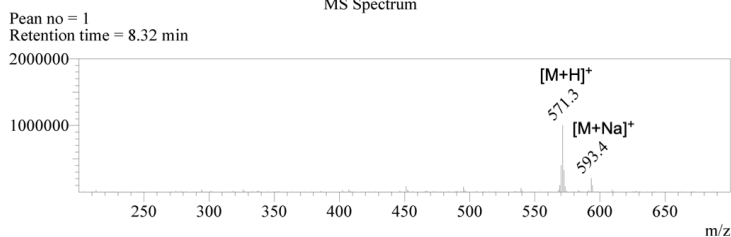

Peak no = 2  
 Retention time = 8.48 min

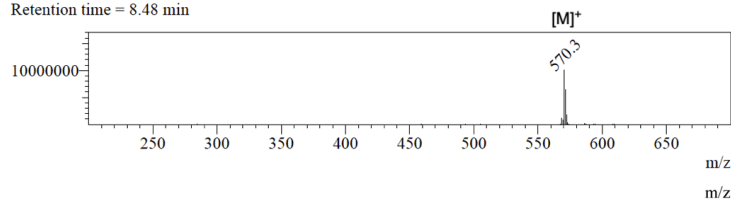

Figure S81. <sup>13</sup>C{<sup>1</sup>H} NMR spectrum of 16b in DMSO-d<sub>6</sub>

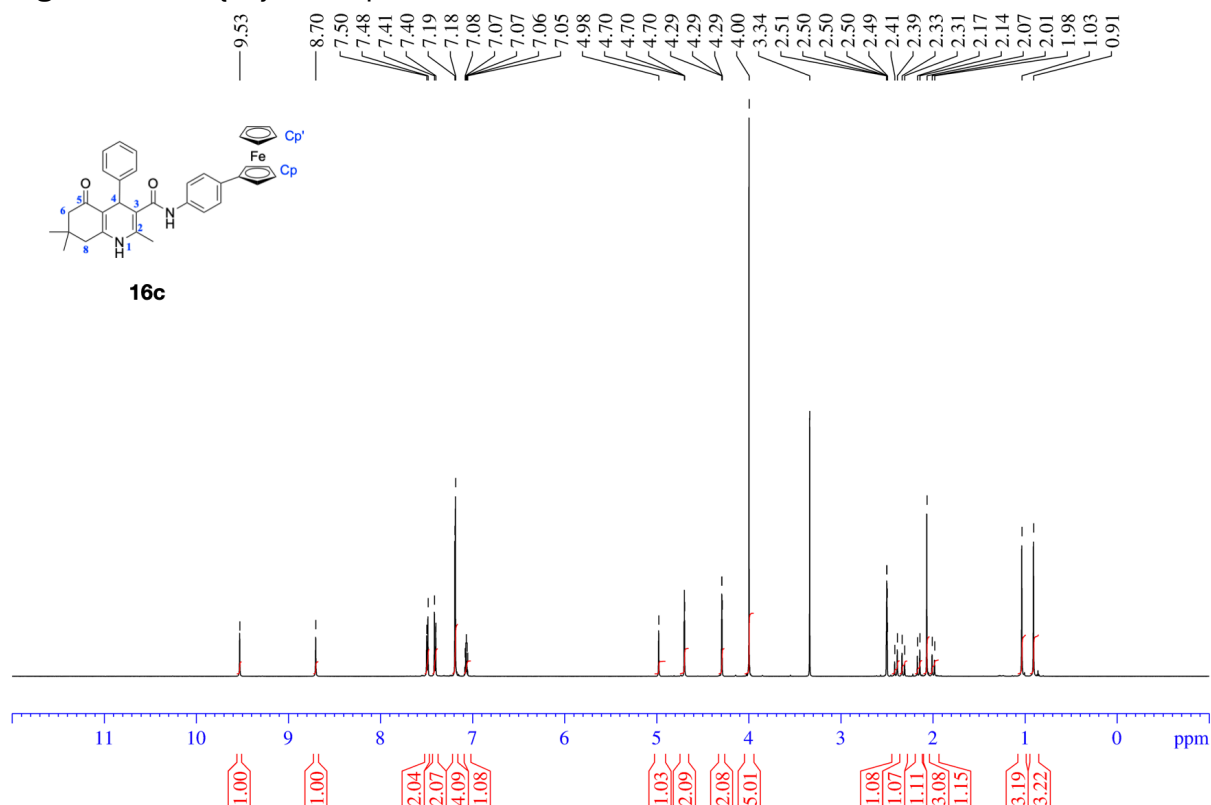

Figure S82. <sup>13</sup>C{<sup>1</sup>H} NMR spectrum of 16c in DMSO-d<sub>6</sub>

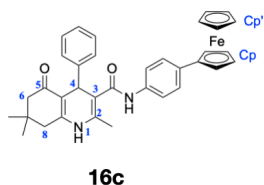

16c

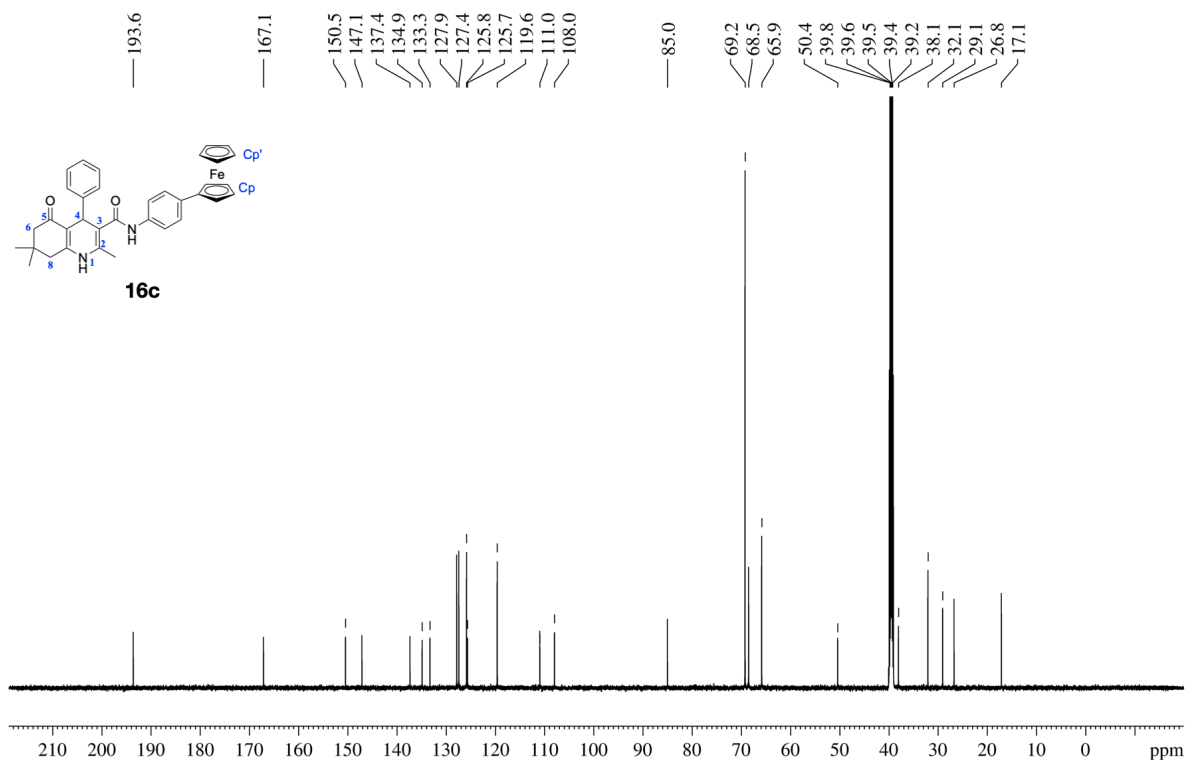

Figure S83.  $^{13}\text{C}\{^1\text{H}\}$  NMR spectrum of **16c** in  $\text{DMSO-d}_6$

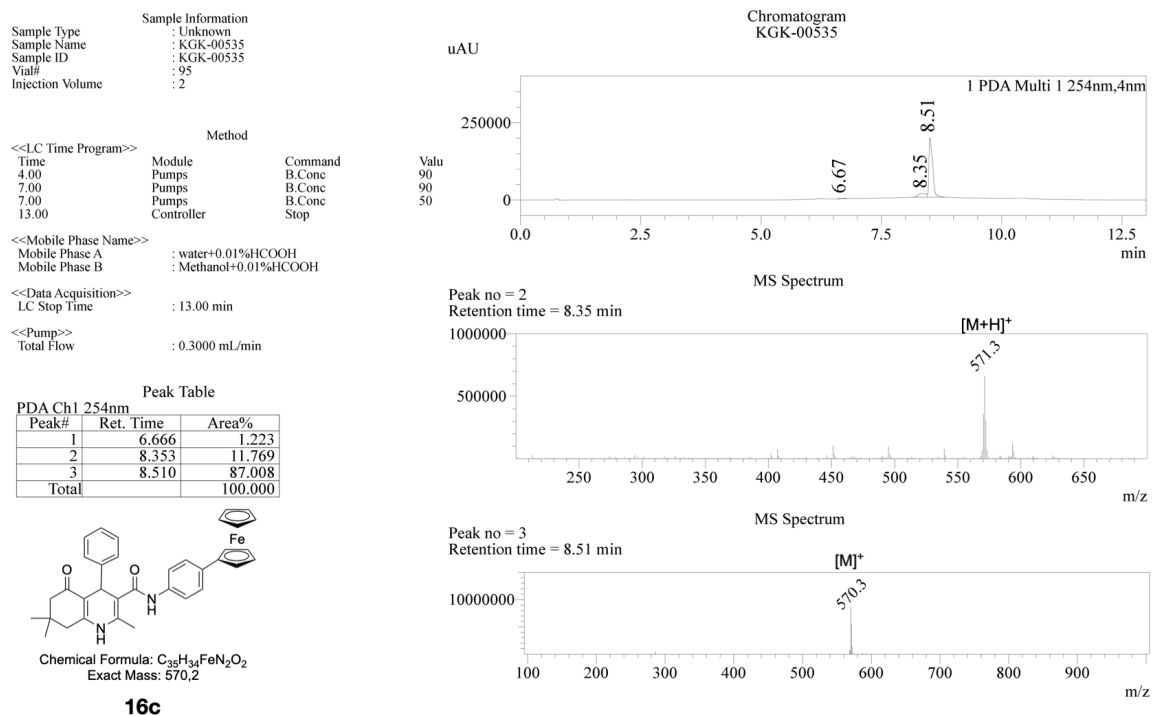

Figure S84.  $^{13}\text{C}\{^1\text{H}\}$  NMR spectrum of **16c** in  $\text{DMSO-d}_6$
